# Supplementary material for: Iron-catalyzed carboamination of vinylarenes with alkanes and nitrogen nucleophiles
Source: Royal Society of Chemistry journal article supplement (doi:10.1039/d3qo01934a), 2024-01-01

## Electronic Supplementary Information For

# Iron-Catalyzed Carboamination of Vinylarenes with Alkanes and Nitrogen Nucleophiles

Fengxiang Zhu\* and Jianxin Xue

School of Chemistry and Chemical Engineering, Shanxi University, Taiyuan 030006, China.

E-mail: zfx201989@sxu.edu.cn (F. Zhu).

### Table of Content

|                                                           |         |
|-----------------------------------------------------------|---------|
| 1. General Methods                                        | S2      |
| 2. Optimization of Reaction Conditions                    | S2      |
| 3. Typical reaction procedure for the synthesis of amines | S3      |
| 4. Unsuccessful examples                                  | S3      |
| 5. Control experiments                                    | S3-S4   |
| 6. Characterization data for products                     | S4-S13  |
| 7. References                                             | S13     |
| 8. NMR Spectrum Copies                                    | S14-S51 |

## 1. General Methods

NMR spectra were recorded on Bruker Avance NEO 600 M and 400 M. Chemical shifts (ppm) are given relative to solvent: references for  $\text{CDCl}_3$  were 7.26 ppm ( $^1\text{H-NMR}$ ) and 77.0 ppm ( $^{13}\text{C-NMR}$ ).  $^{13}\text{C}$  NMR spectra were acquired on a broad band decoupled mode. Multiplets were assigned as s (singlet), d (doublet), t (triplet), dd (doublet of doublet), m (multiplet) and br. s (broad singlet). All measurements were carried out at room temperature unless otherwise stated. Gas chromatography analysis was performed on a Shimadzu 2014 instrument with an FID detector and HP-5 capillary column (polydimethylsiloxane with 5% phenyl groups, 30 m, 0.32 mm i.d., 0.25  $\mu\text{m}$  film thickness) using  $\text{N}_2$  as carrier gas. HRMS was obtained on a Bruker Daltonics Bio-TOF-Q mass spectrometer by the ESI method. The products were isolated from the reaction mixture by column chromatography on silica gel 60, 0.063-0.2 mm, 70-230 mesh. All reactions were carried out under  $\text{N}_2$  atmosphere. All the reagents were purchased from Heowns, Rhawn, and Laajoo chemical company.

## 2. Optimization of Reaction Conditions

**S-Table 1.** Optimization of Reaction Conditions. <sup>[a]</sup>

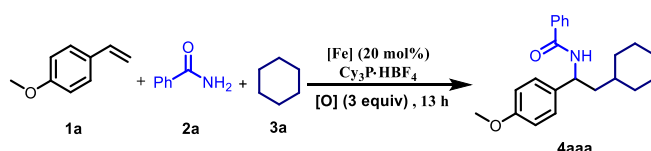

| Entry           | [M]                        | [O]  | T ( $^{\circ}\text{C}$ ) | Yield (%)           |
|-----------------|----------------------------|------|--------------------------|---------------------|
| 1 <sup>b)</sup> | $\text{FeCl}_3$            | DTBP | 130                      | 58                  |
| 2               | $\text{FeBr}_2$            | DTBP | 130                      | 45                  |
| 3               | $\text{Fe}(\text{acac})_2$ | DTBP | 130                      | 38                  |
| 4               | $\text{Fe}(\text{OTf})_2$  | DTBP | 130                      | 34                  |
| 5               | $\text{Fe}(\text{BF}_4)_2$ | DTBP | 130                      | 63                  |
| 6               | $\text{FeCl}_2$            | TBHP | 130                      | 11 (6) <sup>b</sup> |
| 7               | $\text{FeCl}_2$            | BPO  | 130                      | 2 (-) <sup>b</sup>  |
| 8               | $\text{FeCl}_2$            | TBPB | 130                      | 12 (6) <sup>b</sup> |
| 9               | $\text{FeCl}_2$            | TBPO | 130                      | 8 (2) <sup>b</sup>  |
| 10              | $\text{FeCl}_2$            | TBPA | 130                      | 14 (5) <sup>b</sup> |

[a] Reaction conditions: **1a** (0.18 mmol, 1.8 equiv), **2a** (0.1 mmol, 1.0 equiv), DTBP (0.3 mmol, 3.0 equiv),  $[\text{Fe}]$  (20 mol%),  $\text{Cy}_3\text{P}\cdot\text{HBF}_4$  (10 mol%), cyclohexane (1 mL), 130  $^{\circ}\text{C}$ ,  $\text{N}_2$ , and 13 h, yields were determined by GC analysis using hexadecane as internal standard. [b] 120  $^{\circ}\text{C}$ . TBHP: tert-butyl hydroperoxide (5.5mol/L in decane (over molecular sieve 4A)). BPO: benzoyl peroxide. TBPB: tert-butyl peroxybenzoate. TBPO: tert-butyl peroxide. TBPA: tert-butyl peroxyacetate.

### 3. Typical reaction procedure for the synthesis of amines:

General procedure: To a 10 mL oven-dried Schlenk tube equipped with a magnetic stirring bar was added  $\text{FeCl}_2$  (20 mol%) and  $\text{Cy}_3\text{P}\cdot\text{HBF}_4$  (10 mol%). The reaction vessel was evacuated and filled with  $\text{N}_2$  three times. Subsequently, degassed cyclohexane (1.0 mL), alkene **1** (0.18 mmol, 1.8 equiv), amine **2** (0.1 mmol, 1.0 equiv), and DTBP (0.3 mmol, 3 equiv) was added separately via syringe under  $\text{N}_2$  at room temperature. The reaction mixture was heated with stirring at 130 °C (no need for preheating) in an oil bath for 13 hours. Upon completion, the yellow clear liquid was concentrated under vacuum. The residue was purified by silica gel column chromatography using petroleum ether/AcOEt (20:1) as the eluent to give the corresponding products.

Scale up experiment: To a 50 mL oven-dried Schlenk tube equipped with a magnetic stirring bar was added  $\text{FeCl}_2$  (20 mol%) and  $\text{Cy}_3\text{P}\cdot\text{HBF}_4$  (10 mol%). The reaction vessel was evacuated and filled with  $\text{N}_2$  three times. Subsequently, degassed cyclohexane (20 mL), alkene **1a** (5.4 mmol, 1.8 equiv), amine **2a** (3 mmol, 1.0 equiv), and DTBP (9 mmol, 3 equiv) was added separately via syringe under  $\text{N}_2$  at room temperature. The reaction mixture was heated with stirring at 130 °C (no need for preheating) in an oil bath for 13 hours. Upon completion, the yellow clear liquid was concentrated under vacuum. The residue was purified by silica gel column chromatography using petroleum ether/AcOEt (20:1) as the eluent to give the corresponding products.

### 4. Unsuccessful examples

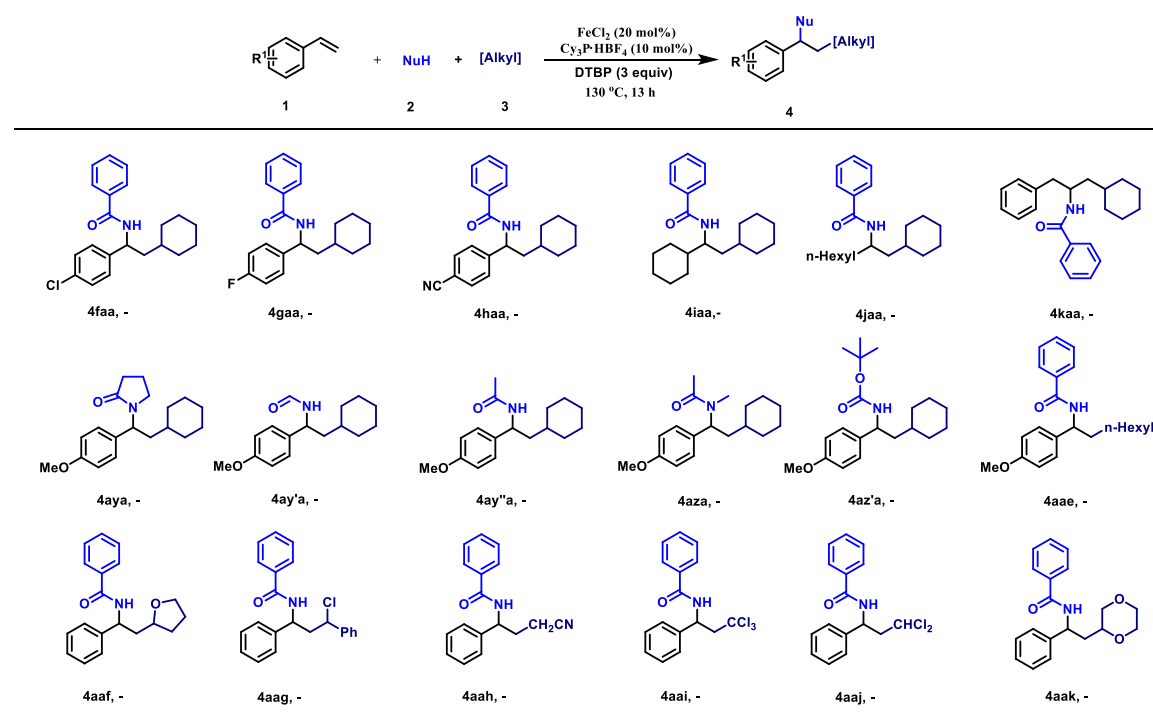

### 5. Control experiments

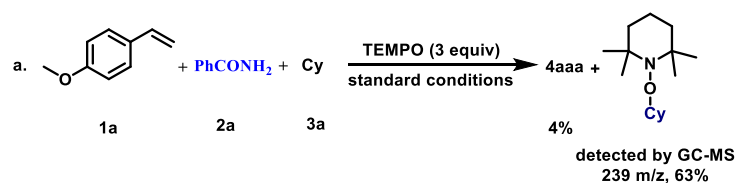

General procedure: To a 10 mL oven-dried Schlenk tube equipped with a magnetic stirring bar was added FeCl<sub>2</sub> (20 mol%) and Cy<sub>3</sub>P·HBF<sub>4</sub> (10 mol%). The reaction vessel was evacuated and filled with N<sub>2</sub> three times. Subsequently, degassed cyclohexane (1.0 mL), alkene **1** (0.18 mmol, 1.8 equiv), amine **2** (0.1 mmol, 1.0 equiv), DTBP (0.3 mmol, 3 equiv) and TEMPO (0.3 mmol, 3 equiv) was added separately via syringe under N<sub>2</sub> at room temperature. The reaction mixture was heated with stirring at 130 °C (no need for preheating) in an oil bath for 13 hours. Upon completion, the reaction mixture was added hexadecane (20 mg) as internal standard. The reaction mixture was diluted with ethyl acetate (2 mL) and stir for 10 minutes. Finally, took 1 μL of the reaction solution and performed GC-MS detection. There was still a large amount of olefin remaining. Benzamide and its possible byproducts have not been discovered.

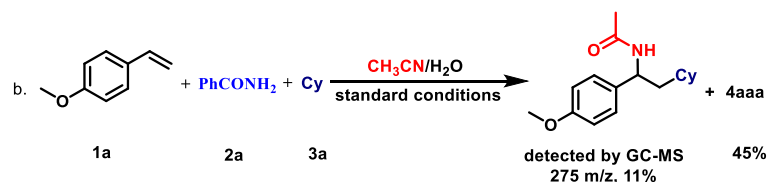

General procedure: To a 10 mL oven-dried Schlenk tube equipped with a magnetic stirring bar was added FeCl<sub>2</sub> (20 mol%) and Cy<sub>3</sub>P·HBF<sub>4</sub> (10 mol%). The reaction vessel was evacuated and filled with N<sub>2</sub> three times. Subsequently, degassed cyclohexane (1.0 mL), alkene **1** (0.18 mmol, 1.8 equiv), amine **2** (0.1 mmol, 1.0 equiv), DTBP (0.3 mmol, 3 equiv), CH<sub>3</sub>CN (0.1 mL), and H<sub>2</sub>O (0.2 mmol, 2 equiv) was added separately via syringe under N<sub>2</sub> at room temperature. The reaction mixture was heated with stirring at 130 °C (no need for preheating) in an oil bath for 13 hours. Upon completion, the reaction mixture was added hexadecane (20 mg) as internal standard. The reaction mixture was diluted with ethyl acetate (2 mL) and stir for 10 minutes. Finally, took 1 μL of the reaction solution and performed GC-MS detection.

## 6. Characterization data for products

### N-(2-cyclohexyl-1-(4-methoxyphenyl)ethyl)benzamide (4aaa)

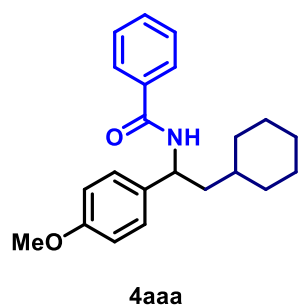

Purification by flash column chromatography (petroleum ether/EtOAc = 15:1). Colorless oil (23.6 mg, 70%). <sup>1</sup>H NMR (400 MHz, Chloroform-*d*) δ 7.67 (d, *J* = 7.2 Hz, 2H), 7.39 (t, *J* = 7.3 Hz, 1H), 7.33 (d, *J* = 7.5 Hz, 2H), 7.21 (d, *J* = 8.4 Hz, 2H), 6.79 (d, *J* = 8.5 Hz, 2H), 6.19 (d, *J* = 7.6 Hz, 1H), 5.17 (q, *J* = 7.8 Hz, 1H), 3.71 (s, 3H), 1.77 – 1.63 (m, 6H), 1.23 – 1.16 (m, 2H), 1.11 – 1.05 (m, 3H), 1.00 – 0.87 (m, 2H). <sup>13</sup>C{<sup>1</sup>H} NMR (101 MHz, Chloroform-*d*) δ 165.4, 157.8, 133.9, 133.8, 130.3, 127.5, 126.8, 125.9, 113.1, 54.3, 49.8, 43.0, 33.5, 32.3, 32.2, 25.5, 25.12, 25.09. GC-MS (EI-70 eV): *m/z* (%) 337 (5), 240 (63), 216 (12), 134 (18), 121 (15), 105 (100). HRMS (ESI): calcd for C<sub>22</sub>H<sub>27</sub>NNaO<sub>2</sub><sup>+</sup> [M+Na]<sup>+</sup> 360.1934, found: 360.1933.

### N-(2-cyclohexyl-1-(2-methoxyphenyl)ethyl)benzamide (4baa)

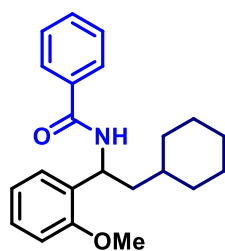

4baa

Purification by flash column chromatography (petroleum ether/EtOAc = 15:1). Colorless oil (19.5 mg, 58%). <sup>1</sup>H NMR (400 MHz, Chloroform-*d*) δ 57.81 (d, *J* = 7.0 Hz, 2H), 7.51 (d, *J* = 7.1 Hz, 1H), 7.46 (t, *J* = 7.2 Hz, 2H), 7.30 (t, *J* = 7.8 Hz, 2H), 7.23 (d, *J* = 9.2 Hz, 1H), 6.96 (t, *J* = 7.9 Hz, 2H), 5.47 (q, *J* = 8.4 Hz, 1H), 3.95 (s, 3H), 1.92 – 1.67 (m, 7H), 1.28 – 1.14 (m, 4H), 1.07 – 0.91 (m, 2H). <sup>13</sup>C{<sup>1</sup>H} NMR (101 MHz, Chloroform-*d*) δ 166.2, 157.3, 135.2, 131.3, 130.3, 129.0, 128.6, 128.4, 127.0, 121.0, 111.2, 55.5, 50.4, 43.4, 34.8, 33.5, 33.2, 26.6, 26.3, 26.2. GC-MS (EI-70 eV): *m/z* (%)

337 (5), 240 (99), 216 (3), 134 (5), 121 (8), 105 (100). HRMS (ESI): calcd for C<sub>22</sub>H<sub>27</sub>NNaO<sub>2</sub><sup>+</sup> [M+Na]<sup>+</sup> 360.1934, found: 360.1938.

### N-(2-cyclohexyl-1-(3,4-dimethoxyphenyl)ethyl)benzamide (4caa)

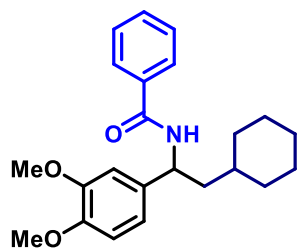

4caa

Purification by flash column chromatography (petroleum ether/EtOAc = 15:1). Colorless oil (24.2 mg, 66%). <sup>1</sup>H NMR (400 MHz, Chloroform-*d*) δ 7.79 (d, *J* = 7.2 Hz, 2H), 7.52 (t, *J* = 7.3 Hz, 1H), 7.45 (t, *J* = 7.4 Hz, 2H), 6.95 (d, *J* = 8.2 Hz, 1H), 6.92 (s, 1H), 6.86 (d, *J* = 8.2 Hz, 1H), 6.36 (d, *J* = 8.1 Hz, 1H), 5.27 (q, *J* = 7.9 Hz, 1H), 3.90 (d, *J* = 6.9 Hz, 6H), 1.88 – 1.71 (m, 7H), 1.35 – 1.27 (m, 1H), 1.23 – 1.15 (m, 3H), 1.11 – 0.92 (m, 2H). <sup>13</sup>C{<sup>1</sup>H} NMR (101 MHz, Chloroform-*d*)

δ 166.6, 149.0, 148.2, 135.5, 134.7, 131.5, 128.7, 127.0, 118.4, 111.2, 110.2, 55.98, 55.96, 51.2, 44.1, 34.6, 33.4, 33.2, 26.5, 26.23, 26.19. GC-MS (EI-70 eV): *m/z* (%) 367 (5), 270 (58), 246 (10), 121 (8), 105 (100), 77 (23). HRMS (ESI): calcd for C<sub>23</sub>H<sub>29</sub>NNaO<sub>3</sub><sup>+</sup> [M+Na]<sup>+</sup> 390.2040, found: 390.2045.

### N-(2-cyclohexyl-1-(4-methoxyphenyl)propyl)benzamide (4daa)

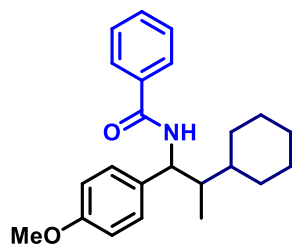

4daa

Purification by flash column chromatography (petroleum ether/EtOAc = 15:1). Colorless oil (19.3 mg, 55%). <sup>1</sup>H NMR (400 MHz, Chloroform-*d*) δ 7.83 – 7.73 (m, 5H), 7.52 (d, *J* = 7.5 Hz, 2H), 7.50 – 7.40 (m, 5H), 7.27 (t, *J* = 7.4 Hz, 4H), 6.89 (q, *J* = 7.9 Hz, 5H), 6.42 (t, *J* = 7.4 Hz, 2H), 5.28 (t, *J* = 7.4 Hz), 5.05 (t, *J* = 7.3 Hz), 3.82 (s, 6H), 1.83 – 1.68 (m, 12H), 1.37 – 1.29 (m, 6H), 1.19 – 1.08 (m, 9H), 0.93 – 0.86 (m, 3H). <sup>13</sup>C{<sup>1</sup>H} NMR (101 MHz, Chloroform-*d*) δ 131.5, 131.4,

128.7, 128.6, 128.4, 127.8, 127.0, 114.0, 55.9, 55.3, 55.1, 43.5, 39.5, 39.0, 32.4, 31.8, 28.1, 27.1, 26.8, 26.7, 26.6, 26.5, 12.5, 11.6. GC-MS (EI-70 eV): *m/z* (%) 351 (3), 240 (75), 137 (5), 121 (5), 105 (100), 77 (22). HRMS (ESI): calcd for C<sub>23</sub>H<sub>29</sub>NNaO<sub>2</sub><sup>+</sup> [M+Na]<sup>+</sup> 374.2091, found: 374.2091.

### N-(2-cyclohexyl-1-(thiophen-2-yl)ethyl)benzamide (4eaa)

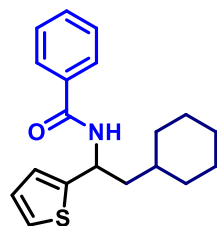

4eaa

Purification by flash column chromatography (petroleum ether/EtOAc = 15:1). Colorless oil (18.5 mg, 59%). <sup>1</sup>H NMR (400 MHz, Chloroform-*d*) δ 7.80 (d, *J* = 7.3 Hz, 2H), 7.54 (t, *J* = 7.3 Hz, 1H), 7.47 (t, *J* = 7.4 Hz, 2H), 7.25 (d, *J* = 5.0 Hz, 1H), 7.08 (d, *J* = 3.3 Hz, 1H), 7.00 (t, *J* = 8.1 Hz, 1H), 6.28 (d, *J* = 8.2 Hz, 1H), 5.66 (q, *J* = 7.9 Hz, 1H), 1.93 – 1.84 (m, 3H), 1.75 – 1.65 (m, 4H), 1.45 – 1.37 (m, 1H), 1.25 – 1.17 (m, 3H), 1.13 – 0.97 (m, 2H). <sup>13</sup>C{<sup>1</sup>H} NMR (101 MHz, Chloroform-*d*) δ 166.5, 146.7, 134.4, 131.7, 128.7, 127.03, 126.97, 124.6, 124.3, 46.9, 44.6, 34.6, 33.4, 33.0, 26.5, 26.21, 26.16.

GC-MS (EI-70 eV): m/z (%) 313 (11), 230 (2), 216 (40), 110 (13), 105 (100), 77 (27). HRMS (ESI): calcd for  $C_{19}H_{23}NNaOS^+$   $[M+Na]^+$  336.1393, found: 336.1395.

#### N-(2-cyclohexyl-1-(4-methoxyphenyl)ethyl)-4-methylbenzamide (4aba)

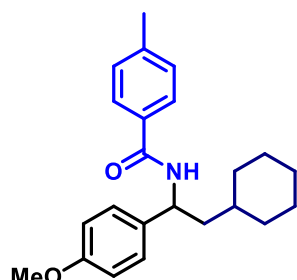

4aba

Purification by flash column chromatography (petroleum ether/EtOAc = 15:1). Colorless oil (22.5 mg, 64%).  $^1H$  NMR (400 MHz, Chloroform-*d*)  $\delta$  7.69 (d,  $J$  = 8.1 Hz, 2H), 7.32 (d,  $J$  = 8.6 Hz, 2H), 7.24 (d,  $J$  = 8.0 Hz, 2H), 6.90 (d,  $J$  = 8.6 Hz, 2H), 6.31 (d,  $J$  = 8.0 Hz, 1H), 5.27 (q,  $J$  = 7.8 Hz, 1H), 3.83 (s, 3H), 2.42 (s, 3H), 1.86 – 1.70 (m, 6H), 1.33 – 1.24 (m, 2H), 1.21 – 1.14 (m, 3H), 1.09 – 0.91 (m, 2H).  $^{13}C\{^1H\}$  NMR (101 MHz, Chloroform-*d*)  $\delta$  166.5, 158.7, 141.9, 135.0, 131.8, 129.2, 127.8, 127.0, 114.0, 55.3, 50.7, 44.1, 34.5, 33.3, 33.2, 26.6, 26.20, 26.17, 21.6. GC-MS (EI-70 eV): m/z (%) 351 (3), 254 (44), 216 (10), 134 (12), 119 (100), 91 (24). HRMS (ESI): calcd for  $C_{23}H_{29}NNaO_2^+$   $[M+Na]^+$  374.2091, found: 374.2094.

#### 4-(tert-butyl)-N-(2-cyclohexyl-1-(4-methoxyphenyl)ethyl)benzamide (4aca)

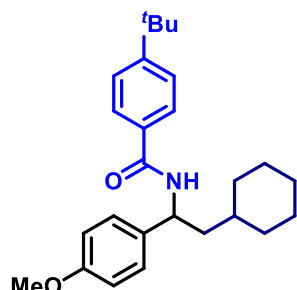

4aca

Purification by flash column chromatography (petroleum ether/EtOAc = 15:1). Colorless oil (26.3 mg, 67%).  $^1H$  NMR (400 MHz, Chloroform-*d*)  $\delta$  7.74 (d,  $J$  = 8.3 Hz, 2H), 7.45 (d,  $J$  = 8.3 Hz, 2H), 7.32 (d,  $J$  = 8.5 Hz, 2H), 6.90 (d,  $J$  = 8.5 Hz, 2H), 6.42 (d,  $J$  = 8.1 Hz, 1H), 5.29 (q,  $J$  = 7.9 Hz, 1H), 3.82 (s, 3H), 1.93 – 1.63 (m, 8H), 1.35 (s, 9H), 1.21 – 1.14 (m, 3H), 1.09 – 0.91 (m, 2H).  $^{13}C$  NMR (101 MHz, Chloroform-*d*)  $\delta$  166.5, 158.7, 154.9, 135.2, 131.8, 127.8, 126.9, 125.5, 114.0, 55.3, 50.7, 44.2, 35.0, 34.5, 33.4, 33.2, 31.2, 26.6, 26.24, 26.19. GC-MS (EI-70 eV): m/z (%) 393 (5), 296 (57), 216 (14), 161 (100), 134 (14), 118 (11). HRMS (ESI): calcd for  $C_{26}H_{35}NNaO_2^+$   $[M+Na]^+$  416.2560, found: 416.2563.

#### N-(2-cyclohexyl-1-(4-methoxyphenyl)ethyl)-4-methoxybenzamide (4ada)

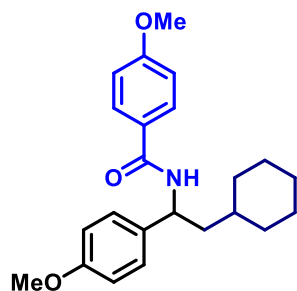

4ada

Purification by flash column chromatography (petroleum ether/EtOAc = 15:1). Colorless oil (28.6 mg, 78%).  $^1H$  NMR (400 MHz, Chloroform-*d*)  $\delta$  7.76 (d,  $J$  = 8.7 Hz, 2H), 7.32 (d,  $J$  = 8.6 Hz, 2H), 6.93 (d,  $J$  = 8.8 Hz, 2H), 6.90 (d,  $J$  = 8.6 Hz, 2H), 6.26 (d,  $J$  = 8.0 Hz, 1H), 5.25 (q,  $J$  = 7.8 Hz, 1H), 3.87 (s, 3H), 3.82 (s, 3H), 1.85 – 1.67 (m, 7H), 1.29 – 1.24 (m, 1H), 1.21 – 1.14 (m, 3H), 1.07 – 0.93 (m, 2H).  $^{13}C\{^1H\}$  NMR (101 MHz, Chloroform-*d*)  $\delta$  166.1, 162.1, 158.7, 135.1, 128.8, 127.8, 127.0, 114.0, 113.7, 55.5, 55.4, 50.7, 44.1, 34.5, 33.32, 33.25, 26.6, 26.20, 26.17. GC-MS (EI-70 eV): m/z (%) 367 (3), 270 (33), 216 (11), 135 (100), 121 (8), 107 (7). HRMS (ESI): calcd for  $C_{23}H_{29}NNaO_3^+$   $[M+Na]^+$  390.2040, found: 390.2045.

#### 4-chloro-N-(2-cyclohexyl-1-(4-methoxyphenyl)ethyl)benzamide (4aea)

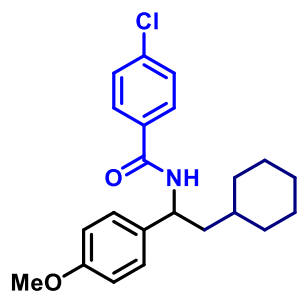

4aea

Purification by flash column chromatography (petroleum ether/EtOAc = 15:1). Colorless oil (27.5 mg, 74%).  $^1H$  NMR (400 MHz, Chloroform-*d*)  $\delta$  7.70 (d,  $J$  = 8.5 Hz, 2H), 7.36 (d,  $J$  = 8.5 Hz, 2H), 7.30 (d,  $J$  = 8.6 Hz, 2H), 6.89 (d,  $J$  = 8.7 Hz, 2H), 6.59 (d,  $J$  = 8.0 Hz, 1H), 5.24 (q,  $J$  = 7.9 Hz, 1H), 3.82 (s, 3H), 1.87 – 1.61 (m, 7H), 1.27 – 1.23 (m, 1H), 1.23 – 1.15 (m, 3H), 1.05 – 0.90 (m, 2H).  $^{13}C\{^1H\}$  NMR (101 MHz, Chloroform-*d*)  $\delta$  165.6, 158.8, 137.6, 134.8, 133.1,

128.8, 128.5, 127.9, 114.1, 55.3, 51.0, 44.0, 34.5, 33.3, 26.5, 26.2. GC-MS (EI-70 eV): m/z (%) 371 (3), 274 (84), 216 (16), 139 (100), 134 (20), 111 (22). HRMS (ESI): calcd for C<sub>22</sub>H<sub>26</sub>CINNaO<sub>2</sub><sup>+</sup> [M+Na]<sup>+</sup> 394.1544, found: 394.1539.

#### 4-bromo-N-(2-cyclohexyl-1-(4-methoxyphenyl)ethyl)benzamide (4afa)

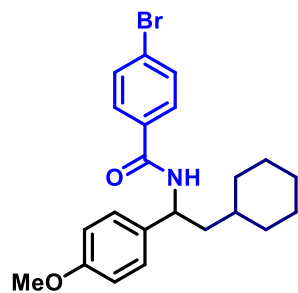

4afa

Purification by flash column chromatography (petroleum ether/EtOAc = 15:1). Colorless oil (27.8 mg, 67%). <sup>1</sup>H NMR (400 MHz, Chloroform-*d*) δ 7.62 (d, *J* = 8.2 Hz, 2H), 7.49 (d, *J* = 8.3 Hz, 2H), 7.30 (d, *J* = 8.4 Hz, 2H), 6.88 (d, *J* = 8.4 Hz, 2H), 6.78 (d, *J* = 8.1 Hz, 1H), 5.24 (q, *J* = 7.8 Hz, 1H), 3.82 (s, 3H), 1.87 – 1.64 (m, 7H), 1.27 – 1.24 (m, 1H), 1.21 – 1.14 (m, 3H), 1.06 – 0.90 (m, 2H). <sup>13</sup>C{<sup>1</sup>H} NMR (101 MHz, Chloroform-*d*) δ 165.8, 158.8, 134.8, 133.6, 131.7, 128.8, 127.9, 126.0, 114.1, 55.3, 51.0, 44.0, 34.5, 33.3, 26.6, 26.2. GC-MS (EI-70 eV): m/z (%) 415 (5), 320 (91), 216 (41), 185 (100), 173 (14), 134 (49).

HRMS (ESI): calcd for C<sub>22</sub>H<sub>26</sub>BrNNaO<sub>2</sub><sup>+</sup> [M+Na]<sup>+</sup> 438.1039, found: 438.1041.

#### N-(2-cyclohexyl-1-(4-methoxyphenyl)ethyl)-2-fluorobenzamide (4aga)

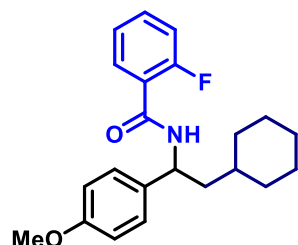

4aga

Purification by flash column chromatography (petroleum ether/EtOAc = 15:1). Colorless oil (19.9 mg, 56%). <sup>1</sup>H NMR (400 MHz, Chloroform-*d*) δ 8.11 (t, *J* = 8.8 Hz, 1H), 7.49 (q, *J* = 7.3 Hz, 1H), 7.33 (d, *J* = 8.6 Hz, 2H), 7.29 (d, *J* = 9.8 Hz, 1H), 7.14 (m, 1H), 6.98 (m, 1H), 6.91 (d, *J* = 8.7 Hz, 2H), 5.28 (q, *J* = 8.8, 8.1 Hz, 1H), 3.83 (s, 3H), 1.88 – 1.80 (m, 3H), 1.77 – 1.66 (m, 4H), 1.33 – 1.26 (m, 1H), 1.23 – 1.14 (m, 3H), 1.09 – 0.91 (m, 2H). <sup>13</sup>C{<sup>1</sup>H} NMR (101 MHz, Chloroform-*d*) δ 162.4, 160.7 (d, *J* = 247.5 Hz), 158.7, 135.0, 133.3 (d, *J* = 9.1

Hz), 132.3 (d, *J* = 2.0 Hz), 127.8, 124.9 (d, *J* = 3.0 Hz), 121.2 (d, *J* = 12.1 Hz), 116.0 (d, *J* = 25.3 Hz), 114.1, 55.3, 51.1, 44.5, 34.5, 33.4, 33.2, 26.6, 26.21, 26.16. <sup>19</sup>F NMR (376 MHz, Chloroform-*d*) δ -106.28. GC-MS (EI-70 eV): m/z (%) 355 (3), 258 (91), 216 (5), 137 (11), 123 (100), 95 (13). HRMS (ESI): calcd for C<sub>22</sub>H<sub>26</sub>FNNaO<sub>2</sub><sup>+</sup> [M+Na]<sup>+</sup> 378.1840, found: 378.1839.

#### N-(2-cyclohexyl-1-(4-methoxyphenyl)ethyl)-4-(trifluoromethyl)benzamide (4aha)

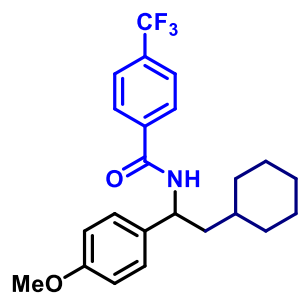

4aha

Purification by flash column chromatography (petroleum ether/EtOAc = 15:1). Colorless oil (28.4 mg, 70%). <sup>1</sup>H NMR (400 MHz, Chloroform-*d*) δ 7.85 (d, *J* = 8.1 Hz, 2H), 7.64 (d, *J* = 8.1 Hz, 2H), 7.32 (d, *J* = 8.6 Hz, 2H), 6.90 (d, *J* = 8.6 Hz, 2H), 6.68 (d, *J* = 8.0 Hz, 1H), 5.26 (q, *J* = 8.1 Hz, 1H), 3.82 (s, 3H), 1.89 – 1.73 (m, 5H), 1.71 – 1.64 (m, 2H), 1.32 – 1.25 (m, 1H), 1.22 – 1.15 (m, 3H), 1.08 – 0.90 (m, 2H). <sup>13</sup>C{<sup>1</sup>H} NMR (101 MHz, Chloroform-*d*) δ 165.5, 158.9, 138.0, 134.6, 133.1 (q, *J* = 33.3 Hz), 127.9, 127.5, 125.6 (q, *J* = 4.0 Hz), 123.7 (q, *J* = 273.7 Hz), 114.1, 55.3, 51.2, 43.9, 34.5, 33.3, 33.2, 26.5, 26.2. GC-MS (EI-70 eV): m/z (%) 405 (5), 308 (100), 216 (10), 173 (88), 145 (26), 121 (10). HRMS (ESI): calcd for C<sub>23</sub>H<sub>26</sub>F<sub>3</sub>NNaO<sub>2</sub><sup>+</sup> [M+Na]<sup>+</sup> 428.1808, found: 428.1803.

#### N-(2-cyclohexyl-1-(4-methoxyphenyl)ethyl)-[1,1'-biphenyl]-4-carboxamide (4aia)

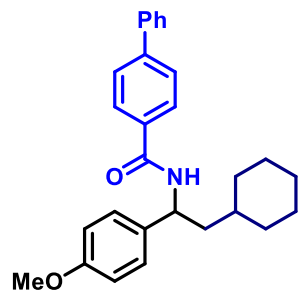

4aia

Purification by flash column chromatography (petroleum ether/EtOAc = 15:1). White solid (30.1 mg, 73%). <sup>1</sup>H NMR (400 MHz, Chloroform-*d*) δ 7.87 (d, *J* = 8.3

Hz, 2H), 7.67 (d,  $J = 8.3$  Hz, 2H), 7.63 (d,  $J = 7.2$  Hz, 2H), 7.50 (t,  $J = 7.4$  Hz, 2H), 7.43 (d,  $J = 7.3$  Hz, 1H), 7.35 (d,  $J = 8.6$  Hz, 2H), 6.92 (d,  $J = 8.7$  Hz, 2H), 6.40 (d,  $J = 7.9$  Hz, 1H), 5.31 (q,  $J = 7.9$  Hz, 1H), 3.83 (s, 3H), 1.90 – 1.76 (m, 4H), 1.74 – 1.66 (m, 3H), 1.34 – 1.31 (m, 1H), 1.23 – 1.16 (m, 3H), 1.11 – 0.96 (m, 2H).  $^{13}\text{C}\{^1\text{H}\}$  NMR (101 MHz, Chloroform- $d$ )  $\delta$  140.1, 133.4, 129.0, 128.1, 127.9, 127.5, 127.3, 114.1, 55.4, 50.9, 44.1, 34.6, 33.34, 33.27, 26.6, 26.22, 26.19. HRMS (ESI): calcd for  $\text{C}_{28}\text{H}_{31}\text{NNaO}_2^+$   $[\text{M}+\text{Na}]^+$  436.2247, found: 436.2245.

#### 4-cyano-N-(2-cyclohexyl-1-(4-methoxyphenyl)ethyl)benzamide (4aja)

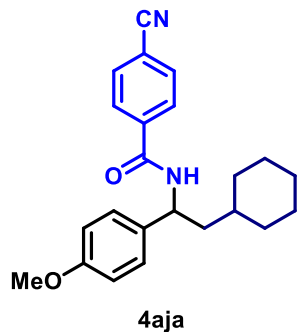

Purification by flash column chromatography (petroleum ether/EtOAc = 15:1). White solid (13.8 mg, 38%).  $^1\text{H}$  NMR (400 MHz, Chloroform- $d$ )  $\delta$  7.87 (d,  $J = 8.3$  Hz, 2H), 7.75 (d,  $J = 8.3$  Hz, 2H), 7.31 (d,  $J = 1.6$  Hz, 2H), 6.92 (d,  $J = 8.6$  Hz, 2H), 6.36 (d,  $J = 8.0$  Hz, 1H), 5.26 (q,  $J = 7.8$  Hz, 1H), 3.84 (s, 3H), 1.89 – 1.78 (m, 4H), 1.76 – 1.69 (m, 3H), 1.27 – 1.24 (m, 1H), 1.21 – 1.17 (m, 3H), 1.09 – 0.96 (m, 2H).  $^{13}\text{C}\{^1\text{H}\}$  NMR (101 MHz, Chloroform- $d$ )  $\delta$  159.0, 138.7, 134.2, 132.5, 127.9, 127.7, 118.2, 115.0, 114.2, 55.4, 51.3, 43.8, 34.5, 33.3, 33.2, 29.8, 26.5, 26.2. GC-MS (EI-70 eV):  $m/z$  (%) 362 (4), 265 (98), 216 (21), 173 (8), 134 (28), 130 (100). HRMS (ESI): calcd for  $\text{C}_{23}\text{H}_{26}\text{N}_2\text{NaO}_2^+$   $[\text{M}+\text{Na}]^+$  385.1886, found: 385.1888.

#### N-(2-cyclohexyl-1-(4-methoxyphenyl)ethyl)-N-methylbenzamide (4aka)

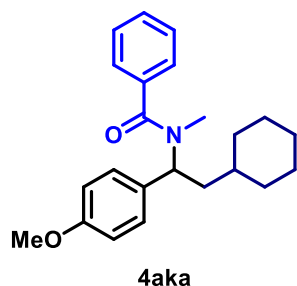

Purification by flash column chromatography (petroleum ether/EtOAc = 15:1). Colorless oil (15.4 mg, 44%).  $^1\text{H}$  NMR (400 MHz, Chloroform- $d$ )  $\delta$  7.45 – 7.39 (m, 6H), 7.19 (d,  $J = 8.3$  Hz, 1H), 6.93 (d,  $J = 8.7$  Hz, 2H), 6.16 (q,  $J = 7.8$  Hz, 0.5H), 4.95 (t,  $J = 7.8$  Hz, 0.5H), 3.85 (s, 3H), 2.89 (s, 1.5H), 2.61 (s, 1.5H), 2.08 – 1.61 (m, 7H), 1.94 – 1.61 (m, 4H), 1.04 – 0.75 (m, 2H).  $^{13}\text{C}$  NMR (101 MHz, Chloroform- $d$ )  $\delta$  158.9, 129.5, 129.4, 129.2, 128.6, 128.5, 128.3, 126.9, 126.7, 114.0, 113.8, 58.3, 55.4, 51.6, 39.6, 37.1, 34.8, 34.2, 34.0, 33.6, 33.4, 33.0, 31.6, 28.1, 26.63, 26.56, 26.4, 26.3, 26.0. GC-MS (EI-70 eV):  $m/z$  (%) 351 (6), 254 (19), 216 (37), 173 (11), 134 (45), 105 (100). HRMS (ESI): calcd for  $\text{C}_{23}\text{H}_{29}\text{NNaO}_2^+$   $[\text{M}+\text{Na}]^+$  374.2091, found: 374.2090.

#### N-(2-cyclohexyl-1-(4-methoxyphenyl)ethyl)benzenesulfonamide (4ala)

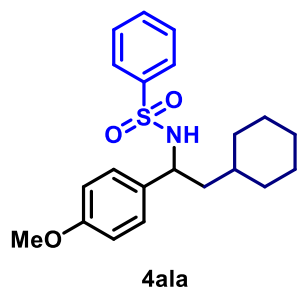

Purification by flash column chromatography (petroleum ether/EtOAc = 15:1). Colorless oil (26.5 mg, 71%).  $^1\text{H}$  NMR (400 MHz, Chloroform- $d$ )  $\delta$  7.67 (d,  $J = 7.9$  Hz, 2H), 7.47 (t,  $J = 7.4$  Hz, 1H), 7.35 (t,  $J = 7.7$  Hz, 2H), 6.95 (d,  $J = 8.6$  Hz, 2H), 6.68 (d,  $J = 8.6$  Hz, 2H), 5.20 (d,  $J = 7.3$  Hz, 1H), 4.37 (q,  $J = 7.5$  Hz, 1H), 3.77 (s, 3H), 1.68 – 1.58 (m, 5H), 1.57 – 1.45 (m, 2H), 1.18 – 1.03 (m, 4H), 0.93 – 0.79 (m, 2H).  $^{13}\text{C}\{^1\text{H}\}$  NMR (101 MHz, Chloroform- $d$ )  $\delta$  158.7, 140.7, 133.4, 132.2, 128.7, 127.7, 127.0, 113.8, 55.3, 45.5, 33.9, 33.1, 32.9, 26.4, 26.1, 26.0. GC-MS (EI-70 eV):  $m/z$  (%) 373 (3), 276 (100), 216 (9), 134 (24), 121 (11), 77 (41). HRMS (ESI): calcd for  $\text{C}_{21}\text{H}_{27}\text{NNaO}_3\text{S}^+$   $[\text{M}+\text{Na}]^+$  396.1604, found: 396.1606.

#### 4-(tert-butyl)-N-(2-cyclohexyl-1-(4-methoxyphenyl)ethyl)benzenesulfonamide (4ama)

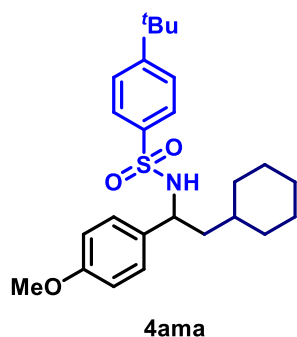

Purification by flash column chromatography (petroleum ether/EtOAc = 15:1). White solid (35.6 mg, 83%).  $^1\text{H}$  NMR (400 MHz, Chloroform- $d$ )  $\delta$  7.59 (d,  $J = 8.5$  Hz, 2H), 7.34 (d,  $J = 8.5$  Hz, 2H), 6.94 (d,  $J = 8.6$  Hz, 2H), 6.65 (d,  $J = 8.6$  Hz,



2H), 5.18 (d,  $J = 7.6$  Hz, 1H), 4.36 (q,  $J = 7.6$  Hz, 1H), 3.77 (s, 3H), 1.66 – 1.58 (m, 6H), 1.52 – 1.45 (m, 1H), 1.33 (s, 9H), 1.17 – 1.07 (m, 4H), 0.92 – 0.77 (m, 2H).  $^{13}\text{C}\{^1\text{H}\}$  NMR (101 MHz, Chloroform- $d$ )  $\delta$  158.6, 155.8, 137.5, 133.5, 127.6, 127.0, 125.6, 113.6, 55.17, 55.19, 45.7, 35.0, 33.8, 33.2, 32.8, 31.1, 26.4, 26.11, 26.05. GC-MS (EI-70 eV):  $m/z$  (%) 429 (3), 232 (100), 216 (13), 198 (24), 134 (25), 121 (14). HRMS (ESI): calcd for  $\text{C}_{25}\text{H}_{35}\text{NNaO}_3\text{S}^+$   $[\text{M}+\text{Na}]^+$  452.2230, found: 452.2236.

#### N-(2-cyclohexyl-1-(4-methoxyphenyl)ethyl)-2-methylbenzenesulfonamide (4ana)

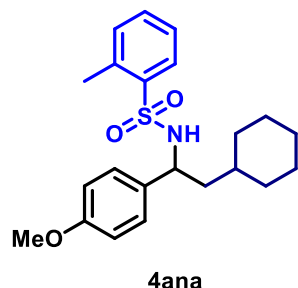

Purification by flash column chromatography (petroleum ether/EtOAc = 15:1). White solid (22.4 mg, 58%).  $^1\text{H}$  NMR (400 MHz, Chloroform- $d$ )  $\delta$  7.84 (d,  $J = 7.9$  Hz, 1H), 7.37 (t,  $J = 7.5$  Hz, 1H), 7.21 (t,  $J = 7.6$  Hz, 1H), 7.16 (d,  $J = 7.5$  Hz, 1H), 6.92 (d,  $J = 8.6$  Hz, 2H), 6.66 (d,  $J = 8.6$  Hz, 2H), 5.20 (d,  $J = 7.4$  Hz, 1H), 4.29 (q,  $J = 7.7$  Hz, 1H), 3.76 (s, 3H), 2.50 (s, 3H), 1.71 – 1.54 (m, 7H), 1.16 – 1.05 (m, 4H), 0.92 – 0.78 (m, 2H).  $^{13}\text{C}\{^1\text{H}\}$  NMR (101 MHz, Chloroform- $d$ )  $\delta$  158.7, 138.5, 136.8, 133.3, 132.5, 132.2, 129.6, 127.6, 126.0, 113.7, 55.3, 55.2,

45.2, 33.9, 33.02, 32.98, 26.5, 26.11, 26.05, 20.3. GC-MS (EI-70 eV):  $m/z$  (%) 387 (5), 290 (100), 216 (16), 173 (7), 134 (29), 121 (17). HRMS (ESI): calcd for  $\text{C}_{22}\text{H}_{29}\text{NNaO}_3\text{S}^+$   $[\text{M}+\text{Na}]^+$  410.1760, found: 410.1756.

#### N-(2-cyclohexyl-1-(4-methoxyphenyl)ethyl)-4-methoxybenzenesulfonamide (4aoa)

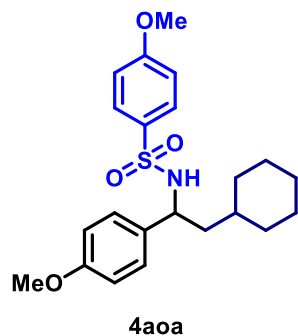

Purification by flash column chromatography (petroleum ether/EtOAc = 15:1). White solid (24.6 mg, 61%).  $^1\text{H}$  NMR (400 MHz, Chloroform- $d$ )  $\delta$  7.58 (d,  $J = 8.8$  Hz, 2H), 6.95 (d,  $J = 8.6$  Hz, 2H), 6.81 (d,  $J = 8.9$  Hz, 2H), 6.70 (d,  $J = 8.6$  Hz, 2H), 4.99 (d,  $J = 7.1$  Hz, 1H), 4.33 (q,  $J = 7.5$  Hz, 1H), 3.85 (s, 3H), 3.78 (s, 3H), 1.71 – 1.59 (m, 6H), 1.56 – 1.50 (m, 1H), 1.17 – 1.07 (m, 4H), 0.92 – 0.81 (m, 2H).  $^{13}\text{C}\{^1\text{H}\}$  NMR (101 MHz, Chloroform- $d$ )  $\delta$  162.5, 158.7, 133.5, 132.4, 129.2, 127.7, 113.8, 113.8, 55.6, 55.3, 55.2, 45.6, 33.9, 33.1, 32.9, 26.5, 26.1, 26.0.

GC-MS (EI-70 eV):  $m/z$  (%) 403 (3), 306 (100), 216 (7), 171 (51), 134 (22), 121 (12). HRMS (ESI): calcd for  $\text{C}_{22}\text{H}_{29}\text{NNaO}_4\text{S}^+$   $[\text{M}+\text{Na}]^+$  426.1710, found: 426.1708.

#### 4-chloro-N-(2-cyclohexyl-1-(4-methoxyphenyl)ethyl)benzenesulfonamide (4apa)

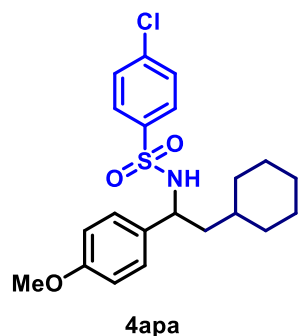

Purification by flash column chromatography (petroleum ether/EtOAc = 15:1). White solid (23.6 mg, 58%).  $^1\text{H}$  NMR (400 MHz, Chloroform- $d$ )  $\delta$  7.53 (d,  $J = 8.6$  Hz, 2H), 7.26 (d,  $J = 8.6$  Hz, 2H), 6.91 (d,  $J = 8.6$  Hz, 2H), 6.66 (d,  $J = 8.6$  Hz, 2H), 5.46 (d,  $J = 7.6$  Hz, 1H), 4.38 (q,  $J = 7.7$  Hz, 1H), 3.77 (s, 3H), 1.68 – 1.61 (m, 6H), 1.55 – 1.48 (m, 1H), 1.20 – 1.06 (m, 4H), 0.93 – 0.80 (m, 2H).  $^{13}\text{C}\{^1\text{H}\}$  NMR (101 MHz, Chloroform- $d$ )  $\delta$  158.8, 139.4, 138.4, 132.9, 128.8, 128.5, 127.7, 113.8, 55.5, 55.4, 45.4, 33.9, 33.1, 32.9, 26.4, 26.1, 26.0. GC-MS (EI-70 eV):  $m/z$  (%) 407 (2), 310 (100), 216 (13), 175 (18), 134 (14), 111 (25). HRMS

(ESI): calcd for  $\text{C}_{21}\text{H}_{26}\text{ClNNaO}_3\text{S}^+$   $[\text{M}+\text{Na}]^+$  430.1214, found: 430.1218.

#### N-(2-cyclohexyl-1-(4-methoxyphenyl)ethyl)-4-fluorobenzenesulfonamide (4aqa)

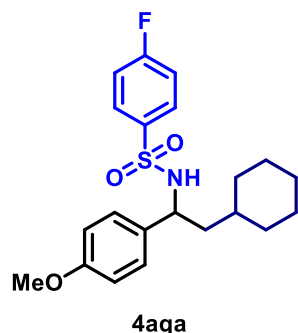

Purification by flash column chromatography (petroleum ether/EtOAc = 15:1). White solid (21.4 mg, 54%).  $^1\text{H}$  NMR (400 MHz, Chloroform- $d$ )  $\delta$  7.64 (d,  $J = 5.1$  Hz, 1H), 7.62 (d,  $J = 5.1$  Hz, 1H), 6.98 (t,  $J = 8.5$  Hz, 2H), 6.93 (d,  $J = 8.5$  Hz,

2H), 6.67 (d,  $J = 8.5$  Hz, 2H), 5.42 (d,  $J = 7.5$  Hz, 1H), 4.38 (q,  $J = 7.6$  Hz, 1H), 3.77 (s, 3H), 1.68 – 1.61 (m, 6H), 1.56 – 1.49 (m, 1H), 1.18 – 1.10 (m, 4H), 0.93 – 0.81 (m, 2H).  $^{13}\text{C}\{^1\text{H}\}$  NMR (101 MHz, Chloroform- $d$ )  $\delta$  164.7 (d,  $J = 254.5$  Hz), 158.8, 137.0 (d,  $J = 3.0$  Hz), 133.1, 129.8 (d,  $J = 9.1$  Hz), 127.7, 115.8 (d,  $J = 23.2$  Hz), 113.8, 55.5, 55.3, 45.5, 33.9, 33.1, 32.9, 26.4, 26.1, 26.0.  $^{19}\text{F}$  NMR (376 MHz, Chloroform- $d$ )  $\delta$  -106.28. GC-MS (EI-70 eV):  $m/z$  (%) 391 (3), 294 (100), 216 (11), 159 (29), 134 (15), 121 (13). HRMS (ESI): calcd for  $\text{C}_{21}\text{H}_{26}\text{FNNaO}_3\text{S}^+$   $[\text{M}+\text{Na}]^+$  414.1510, found: 414.1515.

**N-(2-cyclohexyl-1-(4-methoxyphenyl)ethyl)-4-(trifluoromethyl)benzenesulfonamide (4ara)**

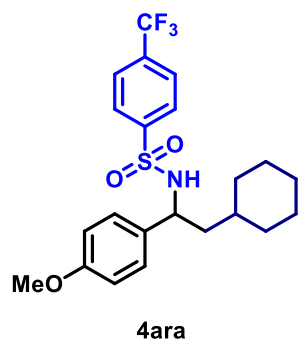

Purification by flash column chromatography (petroleum ether/EtOAc = 15:1). White solid (28.7 mg, 65%).  $^1\text{H}$  NMR (400 MHz, Chloroform- $d$ )  $\delta$  7.69 (d,  $J = 8.2$  Hz, 2H), 7.54 (d,  $J = 8.4$  Hz, 2H), 6.87 (d,  $J = 8.6$  Hz, 2H), 6.60 (d,  $J = 8.6$  Hz, 2H), 5.41 (d,  $J = 7.6$  Hz, 1H), 4.43 (q,  $J = 7.7$  Hz, 1H), 3.73 (s, 3H), 1.73 – 1.61 (m, 6H), 1.55 – 1.48 (m, 1H), 1.20 – 1.07 (m, 4H), 0.96 – 0.86 (m, 2H).  $^{13}\text{C}\{^1\text{H}\}$  NMR (101 MHz, Chloroform- $d$ )  $\delta$  158.9, 144.4, 133.6 (q,  $J = 33.3$  Hz), 132.5, 127.7, 127.6, 125.7 (q,  $J = 4.0$  Hz), 120.6 (q,  $J = 274.7$  Hz), 113.7, 55.7, 55.2, 45.3, 33.9, 33.1, 32.9, 26.4, 26.1, 26.0.  $^{19}\text{F}$  NMR (376 MHz, Chloroform- $d$ )  $\delta$  -63.09. GC-MS (EI-70 eV):  $m/z$  (%) 441 (4), 344 (100), 216 (6), 209 (7), 134 (25), 121 (10). HRMS (ESI): calcd for  $\text{C}_{22}\text{H}_{26}\text{F}_3\text{NNaO}_3\text{S}^+$   $[\text{M}+\text{Na}]^+$  464.1478, found: 464.1481.

**N-(2-cyclohexyl-1-(4-methoxyphenyl)ethyl)-4-(trifluoromethoxy)benzenesulfonamide (4asa)**

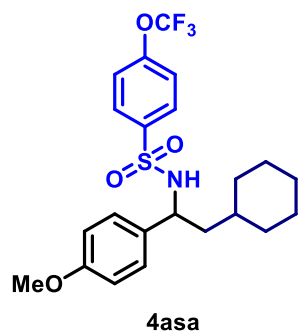

Purification by flash column chromatography (petroleum ether/EtOAc = 15:1). White solid (27.4 mg, 60%).  $^1\text{H}$  NMR (400 MHz, Chloroform- $d$ )  $\delta$  7.65 (d,  $J = 8.8$  Hz, 2H), 7.11 (d,  $J = 8.4$  Hz, 2H), 6.90 (d,  $J = 8.6$  Hz, 2H), 6.64 (d,  $J = 8.6$  Hz, 2H), 5.56 (d,  $J = 7.7$  Hz, 1H), 4.41 (q,  $J = 7.7$  Hz, 1H), 3.74 (s, 3H), 1.71 – 1.59 (m, 6H), 1.54 – 1.46 (m, 1H), 1.20 – 1.06 (m, 4H), 0.95 – 0.82 (m, 2H).  $^{13}\text{C}\{^1\text{H}\}$  NMR (101 MHz, Chloroform- $d$ )  $\delta$  158.9, 151.5, 139.3, 132.8, 131.2 (q,  $J = 349.5$  Hz), 129.5, 129.2, 128.6, 127.7, 127.4, 120.6, 120.2 (q,  $J = 260.6$  Hz), 113.7, 55.5, 55.2, 45.4, 33.9, 33.1, 32.9, 26.4, 26.1, 26.0.  $^{19}\text{F}$  NMR (376 MHz, Chloroform- $d$ )  $\delta$  -57.77. GC-MS (EI-70 eV):  $m/z$  (%) 457 (3), 360 (100), 225 (19), 161 (15), 134 (22), 121 (8). HRMS (ESI): calcd for  $\text{C}_{22}\text{H}_{26}\text{F}_3\text{NNaO}_4\text{S}^+$   $[\text{M}+\text{Na}]^+$  480.1427, found: 480.1222.

**N-(2-cyclohexyl-1-(4-methoxyphenyl)ethyl)thiophene-2-sulfonamide (4ata)**

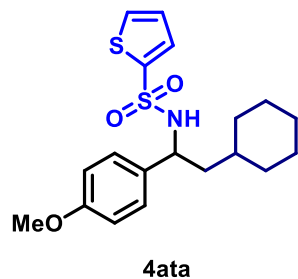

Purification by flash column chromatography (petroleum ether/EtOAc = 15:1). White solid (15.5 mg, 41%).  $^1\text{H}$  NMR (400 MHz, Chloroform- $d$ )  $\delta$  7.48 (d,  $J = 6.1$  Hz, 1H), 7.36 (d,  $J = 4.9$  Hz, 1H), 7.03 (d,  $J = 8.6$  Hz, 2H), 6.93 (t,  $J = 7.8$  Hz, 1H), 6.75 (d,  $J = 8.6$  Hz, 2H), 5.17 (d,  $J = 7.4$  Hz, 1H), 4.44 (q,  $J = 7.5$  Hz, 1H), 3.79 (s, 3H), 1.72 – 1.56 (m, 7H), 1.21 – 1.09 (m, 4H), 0.94 – 0.81 (m, 2H).  $^{13}\text{C}\{^1\text{H}\}$  NMR (101 MHz, Chloroform- $d$ )  $\delta$  158.8, 141.8, 133.4, 132.3, 131.7, 127.6, 127.1, 113.9, 55.6, 55.4, 45.6, 33.9, 33.1, 33.0, 26.5, 26.13, 26.09. GC-MS (EI-70 eV):  $m/z$  (%) 379 (3), 282 (100), 216 (9), 173 (3), 147 (28), 121 (14). HRMS (ESI): calcd for  $\text{C}_{19}\text{H}_{25}\text{NNaO}_3\text{S}_2^+$   $[\text{M}+\text{Na}]^+$  402.1168, found: 402.1168.

### N-(2-cyclohexyl-1-(4-methoxyphenyl)ethyl)aniline<sup>[1]</sup> (4aua)

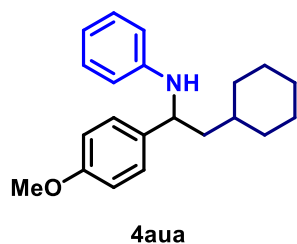

Purification by flash column chromatography (petroleum ether/EtOAc = 50:1). Colorless oil (16.4 mg, 53%). <sup>1</sup>H NMR (400 MHz, Chloroform-*d*) δ 7.29 (d, *J* = 8.5 Hz, 2H), 7.13 (t, *J* = 7.8 Hz, 2H), 6.89 (d, *J* = 8.5 Hz, 2H), 6.67 (t, *J* = 7.3 Hz, 1H), 6.56 (d, *J* = 7.9 Hz, 2H), 4.41 (t, *J* = 7.9 Hz, 1H), 3.82 (s, 3H), 1.88 – 1.66 (m, 6H), 1.64 – 1.57 (m, 1H), 1.41 – 1.35 (m, 1H), 1.30 – 1.17 (m, 3H), 1.08 – 0.91 (m, 2H). <sup>13</sup>C NMR (101 MHz, Chloroform-*d*) δ 158.4, 147.5, 136.8, 129.2, 127.3, 117.06, 114.0, 113.3, 55.3, 54.7, 47.4, 34.5, 33.8, 33.1, 26.6, 26.3, 26.2. GC-MS (EI-70 eV): *m/z* (%) 309 (6), 216 (47), 212 (73), 173 (22), 134 (60), 121 (100).

### 4-chloro-N-(2-cyclohexyl-1-(4-methoxyphenyl)ethyl)aniline (4ava)

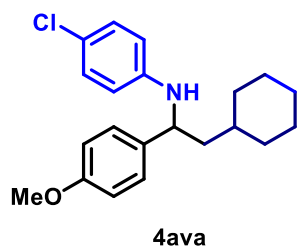

Purification by flash column chromatography (petroleum ether/EtOAc = 50:1). Colorless oil (23.3 mg, 68%). <sup>1</sup>H NMR (400 MHz, Chloroform-*d*) δ 7.25 (d, *J* = 8.6 Hz, 2H), 7.05 (d, *J* = 8.8 Hz, 2H), 6.89 (d, *J* = 8.6 Hz, 2H), 6.46 (d, *J* = 8.7 Hz, 2H), 4.35 (t, *J* = 7.9 Hz, 1H), 3.82 (s, 3H), 1.79 – 1.66 (m, 6H), 1.63 – 1.56 (m, 1H), 1.34 – 1.27 (m, 1H), 1.24 – 1.16 (m, 3H), 1.05 – 0.91 (m, 2H). <sup>13</sup>C{<sup>1</sup>H} NMR (101 MHz, Chloroform-*d*) δ 158.5, 146.0, 136.2, 129.0, 127.3, 121.6, 114.4, 114.1, 55.3, 54.9, 47.2, 34.4, 33.8, 33.1, 26.6, 26.3, 26.1. GC-MS (EI-70 eV): *m/z* (%) 343 (5), 246 (22), 216 (56), 173 (24), 134 (72), 121 (100). HRMS (ESI): calcd for C<sub>21</sub>H<sub>26</sub>ClNNaO<sup>+</sup> [M+Na]<sup>+</sup> 366.1595, found: 366.1599.

### N-(2-cyclohexyl-1-(4-methoxyphenyl)ethyl)-4-fluoroaniline (4av'a)

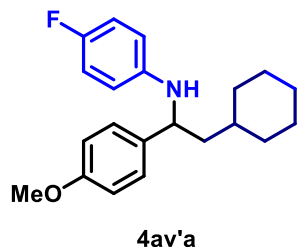

Purification by flash column chromatography (petroleum ether/EtOAc = 50:1). Colorless oil (21.6 mg, 66%). <sup>1</sup>H NMR (400 MHz, Chloroform-*d*) δ 7.27 (d, *J* = 8.6 Hz, 2H), 6.90 (d, *J* = 8.6 Hz, 2H), 6.83 (t, *J* = 8.8 Hz, 2H), 6.48 (d, *J* = 4.4 Hz, 1H), 6.46 (d, *J* = 4.4 Hz, 1H), 4.34 (t, *J* = 8.0 Hz, 1H), 3.83 (s, 3H), 1.86 – 1.66 (m, 6H), 1.63 – 1.56 (m, 1H), 1.34 – 1.28 (m, 1H), 1.25 – 1.17 (m, 3H), 1.07 – 0.91 (m, 2H). <sup>13</sup>C{<sup>1</sup>H} NMR (101 MHz, Chloroform-*d*) δ 158.5, 155.6 (d, *J* = 235.3 Hz), 143.9, 136.6, 127.4, 115.6 (d, *J* = 22.2 Hz), 114.1, 114.0, 55.4, 55.3, 47.4, 34.4, 33.8, 33.1, 26.6, 26.3, 26.2. <sup>19</sup>F NMR (376 MHz, Chloroform-*d*) δ -128.57. GC-MS (EI-70 eV): *m/z* (%) 327 (4), 230 (26), 216 (64), 173 (29), 134 (94), 121 (100). HRMS (ESI): calcd for C<sub>21</sub>H<sub>26</sub>FNNaO<sup>+</sup> [M+Na]<sup>+</sup> 350.1891, found: 350.1887.

### N-(2-cyclohexyl-1-(4-methoxyphenyl)ethyl)-4-(trifluoromethyl)aniline (4av''a)

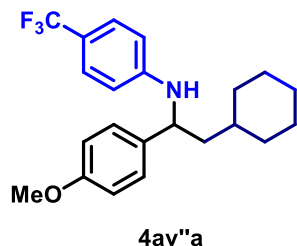

Purification by flash column chromatography (petroleum ether/EtOAc = 50:1). Colorless oil (29.4 mg, 78%). <sup>1</sup>H NMR (400 MHz, Chloroform-*d*) δ 7.35 (d, *J* = 8.5 Hz, 2H), 7.27 (d, *J* = 8.6 Hz, 2H), 6.91 (d, *J* = 8.6 Hz, 2H), 6.56 (d, *J* = 8.5 Hz, 2H), 4.44 (t, *J* = 7.9 Hz, 1H), 3.83 (s, 3H), 1.86 – 1.59 (m, 7H), 1.40 – 1.29 (m, 1H), 1.25 – 1.17 (m, 3H), 1.09 – 0.95 (m, 2H). <sup>13</sup>C{<sup>1</sup>H} NMR (101 MHz, Chloroform-*d*) δ 158.6, 149.9, 135.8, 127.2, 129.0 (q, *J* = 4.0 Hz), 125.1 (q, *J* = 260.6 Hz), 118.5 (q, *J* = 32.3 Hz), 114.1, 112.4, 55.3, 54.4, 47.1, 34.4, 33.8, 33.0, 26.5, 26.3, 26.1. <sup>19</sup>F NMR (376 MHz, Chloroform-*d*) δ -60.88. GC-MS (EI-70 eV): *m/z* (%) 377 (5), 280 (86), 216 (16), 161 (47), 134 (67), 121 (100). HRMS (ESI): calcd for C<sub>22</sub>H<sub>26</sub>F<sub>3</sub>NNaO<sup>+</sup> [M+Na]<sup>+</sup> 400.1859, found: 400.1856.

### N-(2-cyclohexyl-1-(4-methoxyphenyl)ethyl)-4-(trifluoromethoxy)aniline (4av'''a)

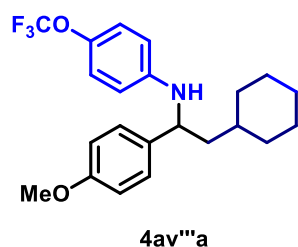

Purification by flash column chromatography (petroleum ether/EtOAc = 50:1). Colorless oil (31.4 mg, 80%). <sup>1</sup>H NMR (400 MHz, Chloroform-*d*) δ 7.27 (d, *J* = 8.6 Hz, 2H), 6.97 (d, *J* = 8.6 Hz, 2H), 6.90 (d, *J* = 8.6 Hz, 2H), 6.49 (d, *J* = 8.9 Hz, 2H), 4.35 (t, *J* = 8.1 Hz, 1H), 3.83 (s, 3H), 1.83 – 1.66 (m, 6H), 1.64 – 1.57 (m, 1H), 1.40 – 1.33 (m, 1H), 1.27 – 1.16 (m, 3H), 1.07 – 0.91 (m, 2H). <sup>13</sup>C{<sup>1</sup>H} NMR (101 MHz, Chloroform-*d*) δ 158.6, 146.3, 140.1, 136.2, 127.3, 122.4, 120.7 (q, *J* = 256.5 Hz), 114.1, 113.4, 55.3, 55.0, 47.3, 34.4, 33.8, 33.1, 26.6, 26.3, 26.1. <sup>19</sup>F NMR (376 MHz, Chloroform-*d*) δ -58.44. GC-MS (EI-70 eV): *m/z* (%) 393 (6), 296 (43), 216 (52), 177 (38), 134 (66), 121 (100). HRMS (ESI): calcd for C<sub>22</sub>H<sub>26</sub>F<sub>3</sub>NNaO<sub>2</sub><sup>+</sup> [M+Na]<sup>+</sup> 416.1808, found: 416.1809.

### 4-((2-cyclohexyl-1-(4-methoxyphenyl)ethyl)amino)benzotrile (4awa)

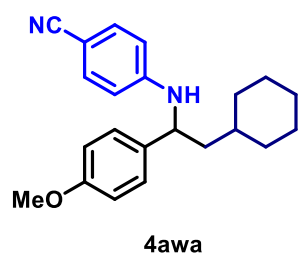

Purification by flash column chromatography (petroleum ether/EtOAc = 50:1). Colorless oil (27.7 mg, 83%). <sup>1</sup>H NMR (400 MHz, Chloroform-*d*) δ 7.36 (d, *J* = 8.7 Hz, 2H), 7.23 (d, *J* = 8.6 Hz, 2H), 6.89 (d, *J* = 8.6 Hz, 2H), 6.51 (d, *J* = 8.8 Hz, 2H), 4.61 (s, 1H), 4.43 (t, *J* = 7.2 Hz, 1H), 3.82 (s, 3H), 1.83 – 1.64 (m, 7H), 1.38 – 1.32 (m, 1H), 1.26 – 1.15 (m, 3H), 1.07 – 0.94 (m, 2H). <sup>13</sup>C{<sup>1</sup>H} NMR (101 MHz, Chloroform-*d*) δ 158.7, 150.6, 135.1, 133.7, 127.2, 120.7, 114.2, 112.9, 98.5, 55.3, 54.4, 46.9, 34.3, 33.7, 33.0, 26.5, 26.2, 26.1. GC-MS (EI-70 eV): *m/z* (%) 334 (3), 237 (29), 216 (59), 173 (26), 134 (79), 118 (100). HRMS (ESI): calcd for C<sub>22</sub>H<sub>26</sub>NNaO<sup>+</sup> [M+Na]<sup>+</sup> 357.1937, found: 357.1934.

### 1-(4-((2-cyclohexyl-1-(4-methoxyphenyl)ethyl)amino)phenyl)ethan-1-one (4axa)

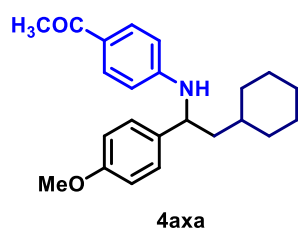

Purification by flash column chromatography (petroleum ether/EtOAc = 50:1). Colorless oil (21.4 mg, 61%). <sup>1</sup>H NMR (400 MHz, Chloroform-*d*) δ 7.77 (d, *J* = 8.8 Hz, 2H), 7.25 (d, *J* = 8.6 Hz, 2H), 6.89 (d, *J* = 8.6 Hz, 2H), 6.52 (d, *J* = 8.8 Hz, 2H), 4.63 (s, 1H), 4.49 (t, *J* = 7.1 Hz, 1H), 3.82 (s, 3H), 2.48 (s, 3H), 1.81 – 1.59 (m, 7H), 1.42 – 1.33 (m, 1H), 1.26 – 1.14 (m, 3H), 1.08 – 0.92 (m, 2H). <sup>13</sup>C{<sup>1</sup>H} NMR (101 MHz, Chloroform-*d*) δ 196.5, 158.6, 151.4, 135.6, 130.8, 127.2, 126.5, 114.2, 112.1, 55.3, 54.3, 47.0, 34.4, 33.7, 33.0, 26.5, 26.2, 26.13, 26.10. GC-MS (EI-70 eV): *m/z* (%) 351 (5), 254 (39), 216 (61), 173 (28), 134 (77), 121 (100). HRMS (ESI): calcd for C<sub>23</sub>H<sub>29</sub>NNaO<sub>2</sub><sup>+</sup> [M+Na]<sup>+</sup> 374.2091, found: 374.2096.

### N-(2-cyclopentyl-1-(4-methoxyphenyl)ethyl)benzamide (4aab)

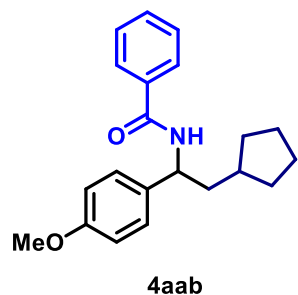

Purification by flash column chromatography (petroleum ether/EtOAc = 15:1). Colorless oil (21.0 mg, 65%). <sup>1</sup>H NMR (400 MHz, Chloroform-*d*) δ 7.80 (d, *J* = 7.1 Hz, 2H), 7.51 (t, *J* = 7.3 Hz, 1H), 7.43 (t, *J* = 7.5 Hz, 2H), 7.34 (d, *J* = 8.6 Hz, 2H), 6.91 (d, *J* = 8.7 Hz, 2H), 6.51 (s, 1H), 5.19 (q, *J* = 7.7 Hz, 1H), 3.83 (s, 3H), 2.02 – 1.92 (m, 2H), 1.85 – 1.73 (m, 3H), 1.67 – 1.60 (m, 2H), 1.57 – 1.48 (m, 2H), 1.29 – 1.14 (m, 2H). <sup>13</sup>C{<sup>1</sup>H} NMR (101 MHz, Chloroform-*d*) δ 166.6, 158.8, 134.8, 134.7, 131.5, 128.6, 127.9, 127.0, 114.1, 55.4, 52.9, 42.7, 37.1, 33.0, 32.6, 25.3, 25.1. GC-MS (EI-70 eV): *m/z* (%) 323 (5), 240 (61), 202 (12), 134 (11), 121 (15), 105 (100). HRMS (ESI): calcd for C<sub>21</sub>H<sub>25</sub>NNaO<sub>2</sub><sup>+</sup> [M+Na]<sup>+</sup> 346.1778, found: 346.1781.

### N-(2-cyclooctyl-1-(4-methoxyphenyl)ethyl)benzamide (4aac)

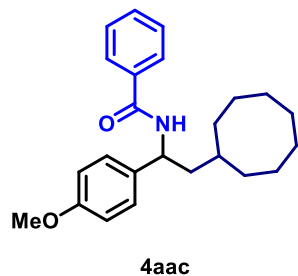

Purification by flash column chromatography (petroleum ether/EtOAc = 15:1). Colorless oil (24.8 mg, 68%).  $^1\text{H}$  NMR (400 MHz, Chloroform-*d*)  $\delta$  7.79 (d,  $J$  = 7.2 Hz, 2H), 7.51 (t,  $J$  = 7.3 Hz, 1H), 7.44 (t,  $J$  = 7.4 Hz, 2H), 7.33 (d,  $J$  = 8.6 Hz, 2H), 6.91 (d,  $J$  = 8.6 Hz, 2H), 6.40 (d,  $J$  = 8.0 Hz, 1H), 5.25 (q,  $J$  = 7.8 Hz, 1H), 3.83 (s, 3H), 1.92 – 1.60 (m, 7H), 1.59 – 1.51 (m, 3H), 1.47 – 1.35 (m, 6H), 1.34 – 1.27 (m, 1H).  $^{13}\text{C}\{^1\text{H}\}$  NMR (101 MHz, Chloroform-*d*)  $\delta$  166.6, 158.8, 134.9, 134.8, 131.5, 128.6, 127.9, 127.0, 114.1, 55.4, 51.4, 44.3, 34.0, 31.9, 31.8, 27.49, 27.46, 26.2, 25.3, 25.1. GC-MS (EI-70 eV):  $m/z$  (%) 365 (6), 240 (82), 134 (14), 121 (10), 105 (100), 77 (23). HRMS (ESI): calcd for  $\text{C}_{24}\text{H}_{37}\text{NNaO}_2^+$   $[M+\text{Na}]^+$  388.2247, found: 388.2251.

### N-(1-(4-methoxyphenyl)-3-phenylpropyl)benzamide (4aad)<sup>[2]</sup>

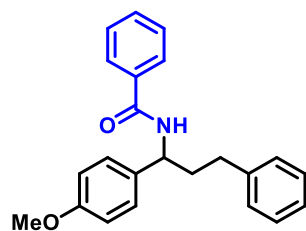

Purification by flash column chromatography (petroleum ether/EtOAc = 15:1). White solid (24.6 mg, 71%).  $^1\text{H}$  NMR (600 MHz, Chloroform-*d*)  $\delta$  7.72 (d,  $J$  = 7.5 Hz, 2H), 7.49 (t,  $J$  = 7.3 Hz, 1H), 7.41 (t,  $J$  = 7.7 Hz, 2H), 7.32 (d,  $J$  = 8.5 Hz, 2H), 7.29 (t,  $J$  = 7.4 Hz, 2H), 7.21 (t,  $J$  = 8.8 Hz, 3H), 6.91 (d,  $J$  = 8.6 Hz, 2H), 6.43 (d,  $J$  = 7.9 Hz, 1H), 5.22 (q,  $J$  = 7.5 Hz, 1H), 3.82 (s, 3H), 2.75 – 2.63 (m, 2H), 2.37 – 2.31 (m, 1H), 2.25 – 2.19 (m, 1H).  $^{13}\text{C}\{^1\text{H}\}$  NMR (151 MHz, Chloroform-*d*)  $\delta$  166.6, 159.0, 141.5, 134.6, 134.0, 131.4, 128.54, 128.52, 128.4, 127.9, 126.9, 126.0, 55.3, 53.3, 37.6, 32.7. GC-MS (EI-70 eV):  $m/z$  (%) 345 (5), 254 (10), 240 (35), 224 (11), 105 (100), 77 (28).

## 7. References

- [1] S. N. Gockel, S. Lee, B. L. Gay, K. L. Hull, Oxidative Three-Component Carboamination of Vinylarenes with Alkylboronic Acids. *ACS Catal.*, 2021, **11**, 5166–5171.
- [2] J. J. Kennedy-Ellis, E. D. Boldt, S. R. Chemler, Synthesis of Benzylureas and Related Amine Derivatives via Copper-Catalyzed Three-Component Carboamination of Styrenes, *Org. Lett.*, 2020, **22**, 8365–8369.

## 8. NMR Spectrum Copies

$^1\text{H}$  NMR (400 MHz) Spectrum of **4aaa** in  $\text{CDCl}_3$

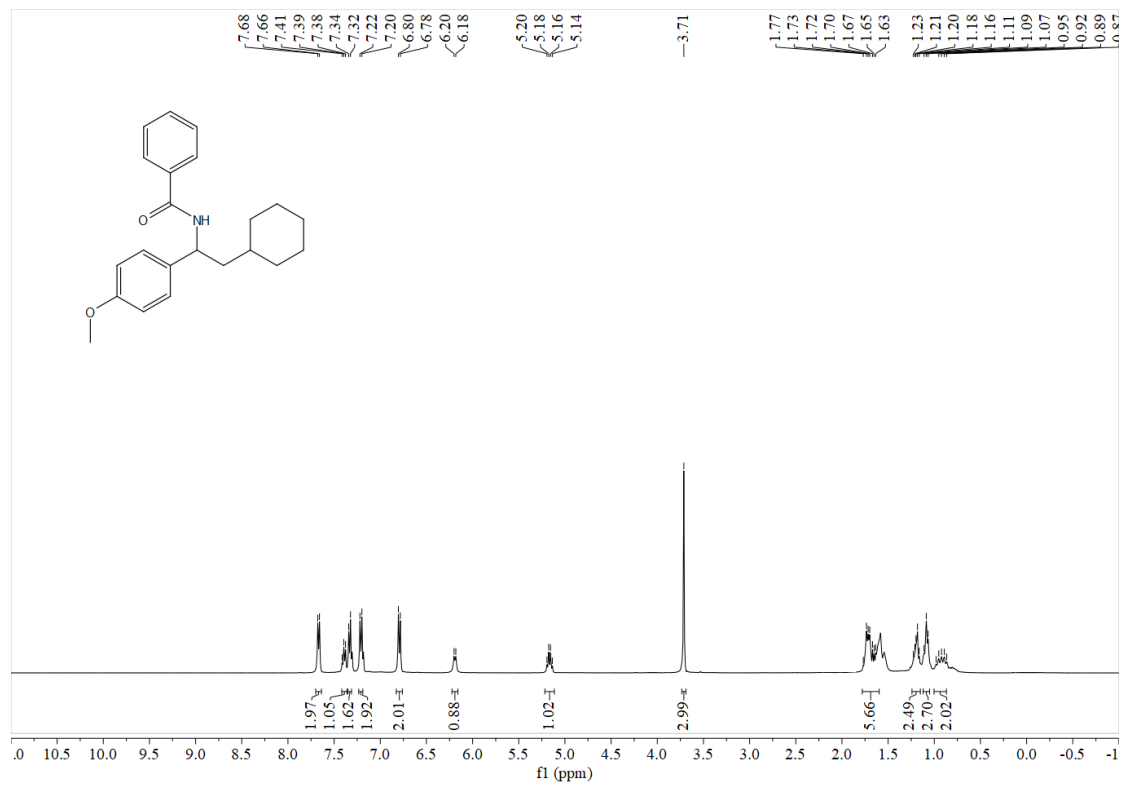

$^{13}\text{C}\{^1\text{H}\}$  NMR (101 MHz) Spectrum of **4aaa** in  $\text{CDCl}_3$

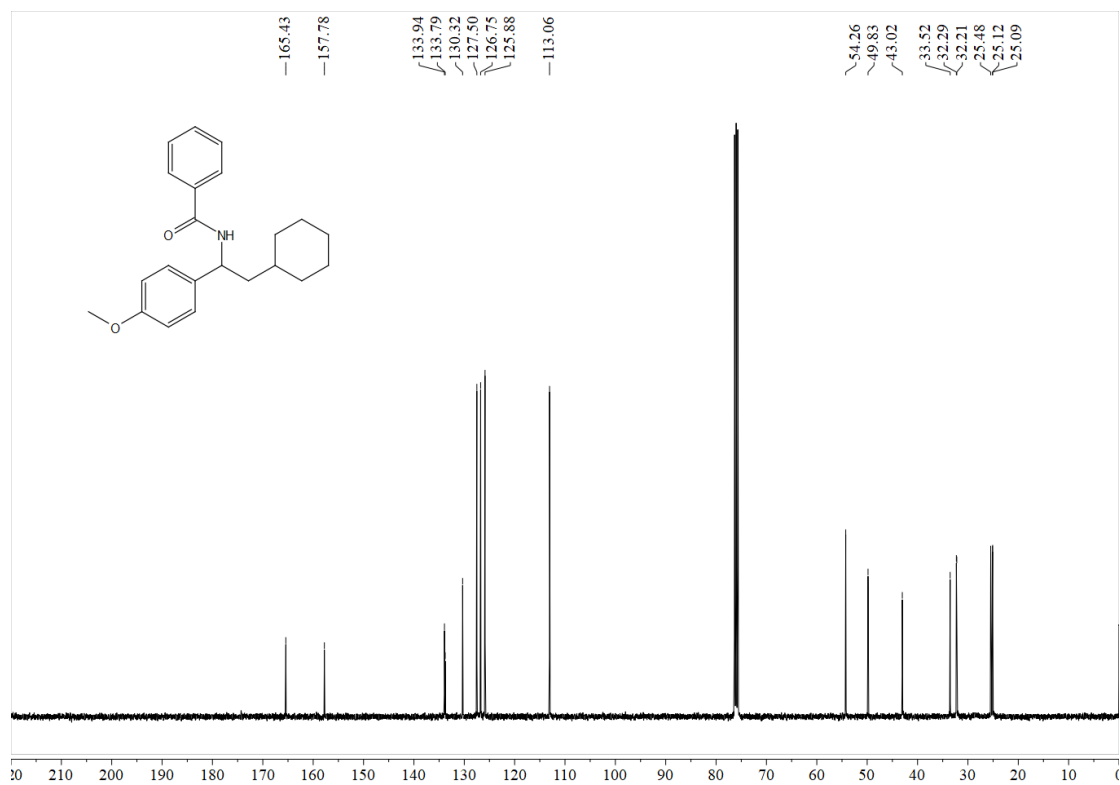

$^1\text{H}$  NMR (400 MHz) Spectrum of **4baa** in  $\text{CDCl}_3$

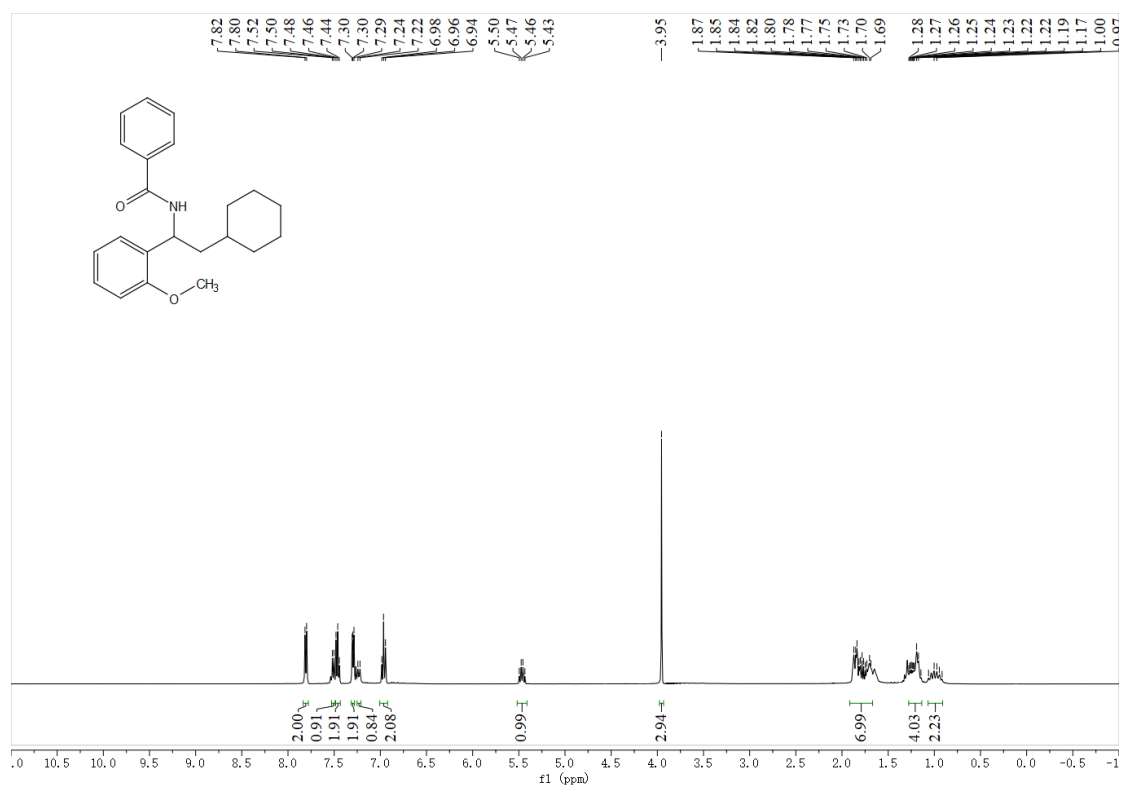

$^{13}\text{C}\{^1\text{H}\}$  NMR (101 MHz) Spectrum of **4baa** in  $\text{CDCl}_3$

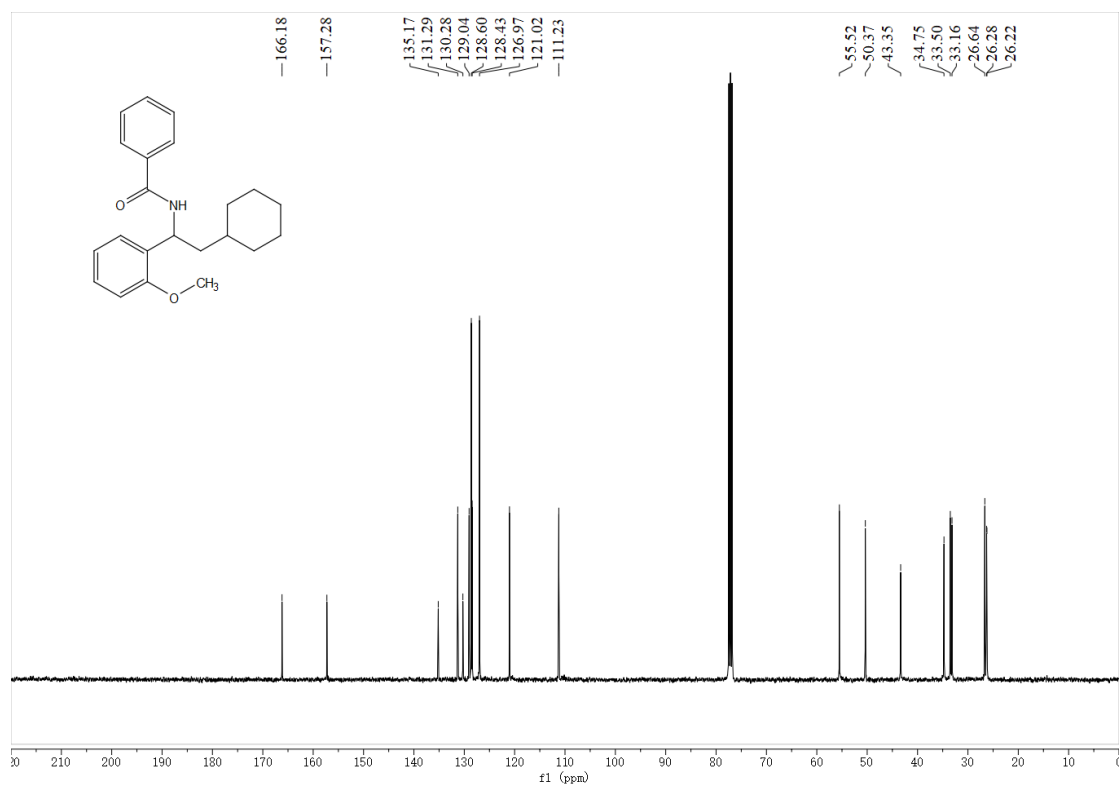

$^1\text{H}$  NMR (400 MHz) Spectrum of **4caa** in  $\text{CDCl}_3$

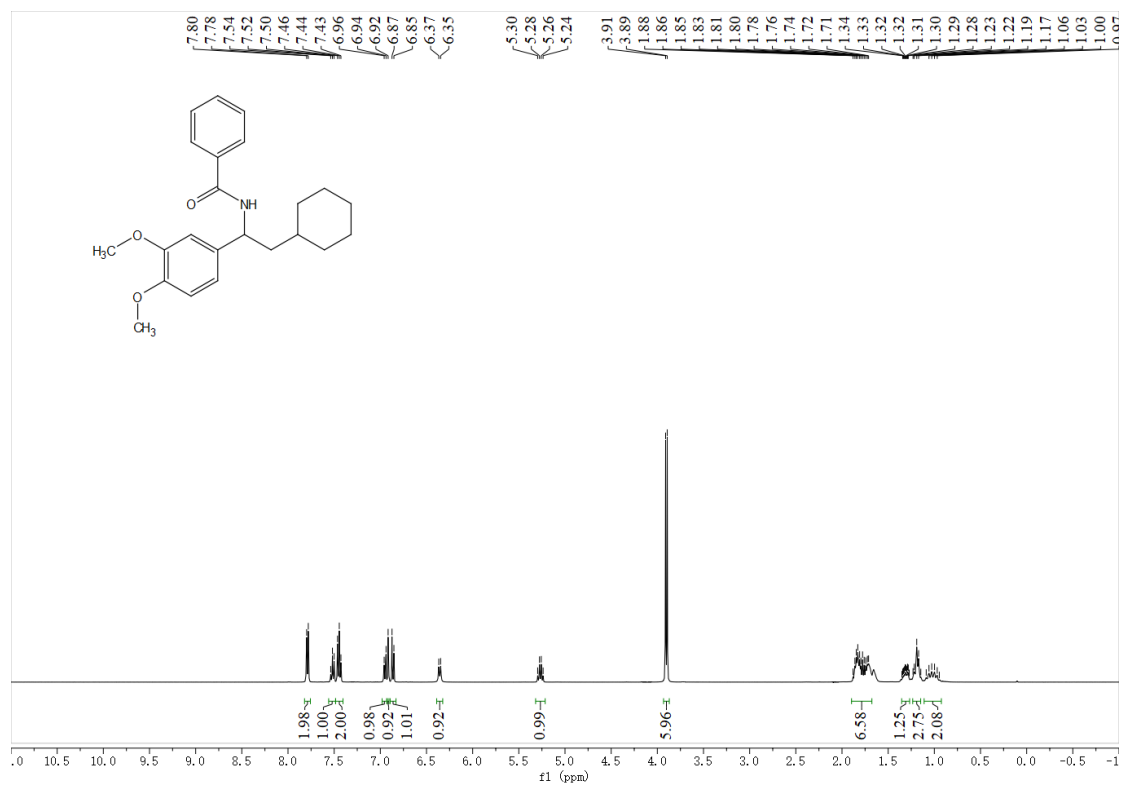

$^{13}\text{C}\{^1\text{H}\}$  NMR (101 MHz) Spectrum of **4caa** in  $\text{CDCl}_3$

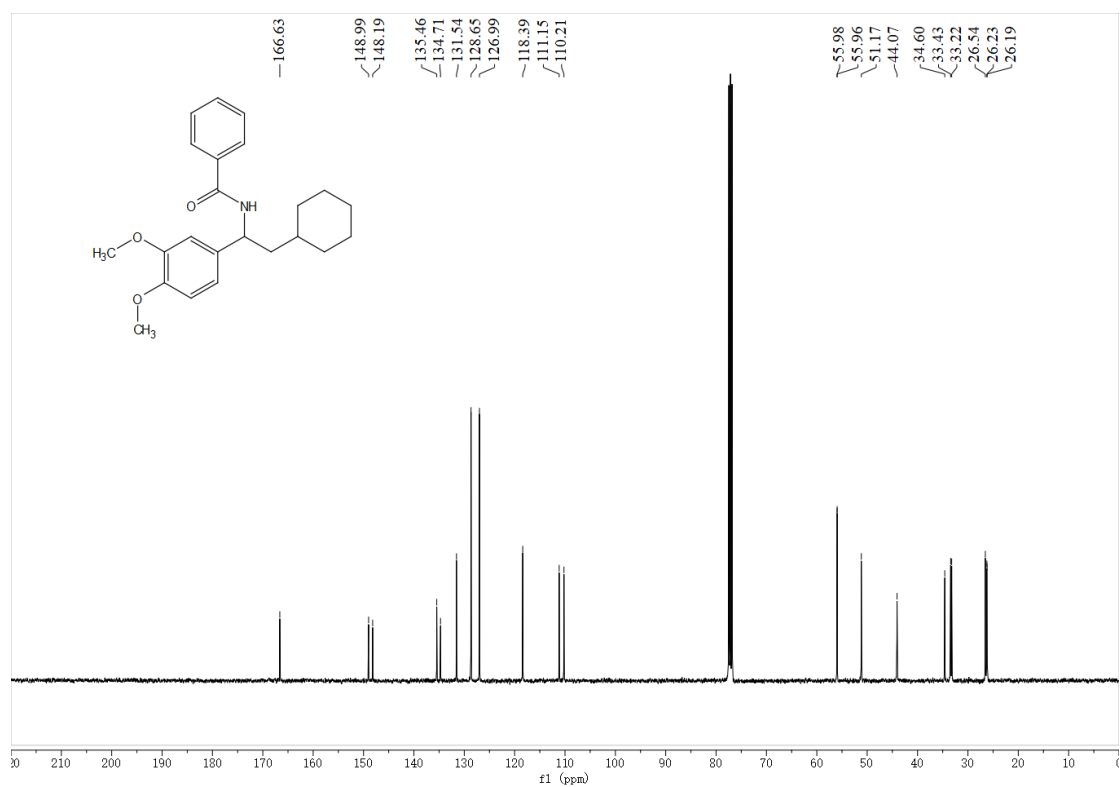



<sup>1</sup>H NMR (400 MHz) Spectrum of **4daa** in CDCl<sub>3</sub>

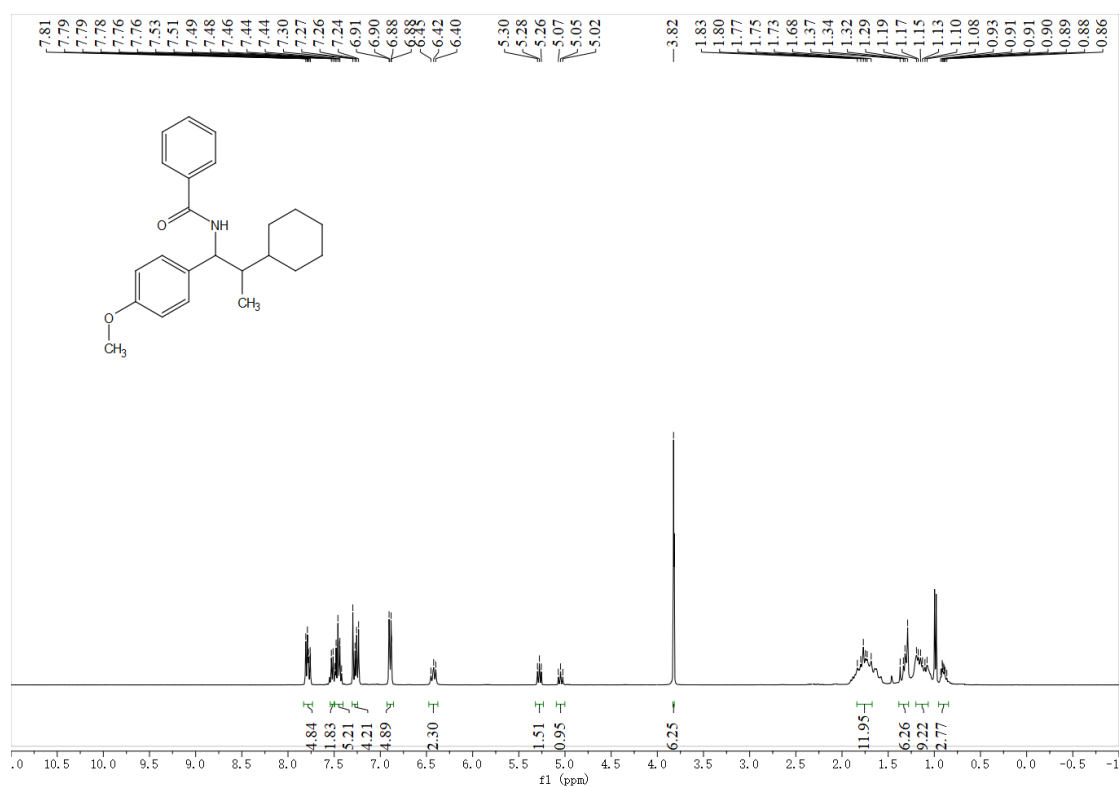

<sup>13</sup>C{<sup>1</sup>H} NMR (101 MHz) Spectrum of **4daa** in CDCl<sub>3</sub>

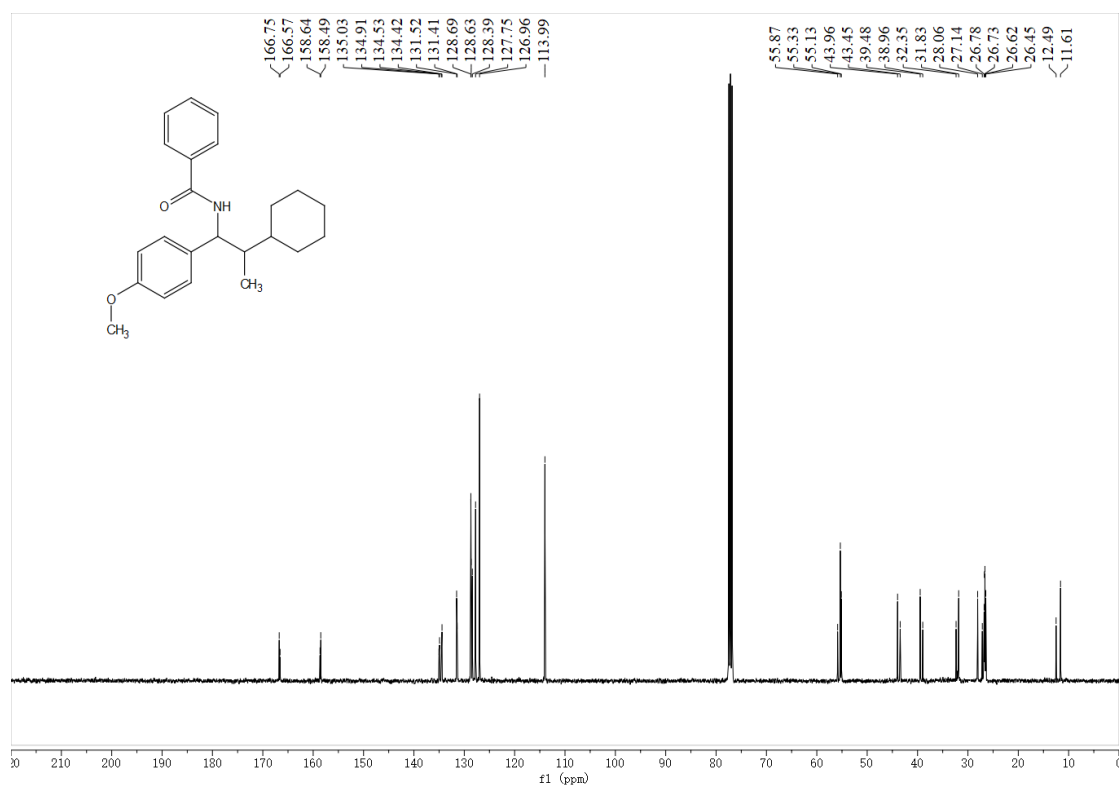

$^1\text{H}$  NMR (400 MHz) Spectrum of **4eaa** in  $\text{CDCl}_3$

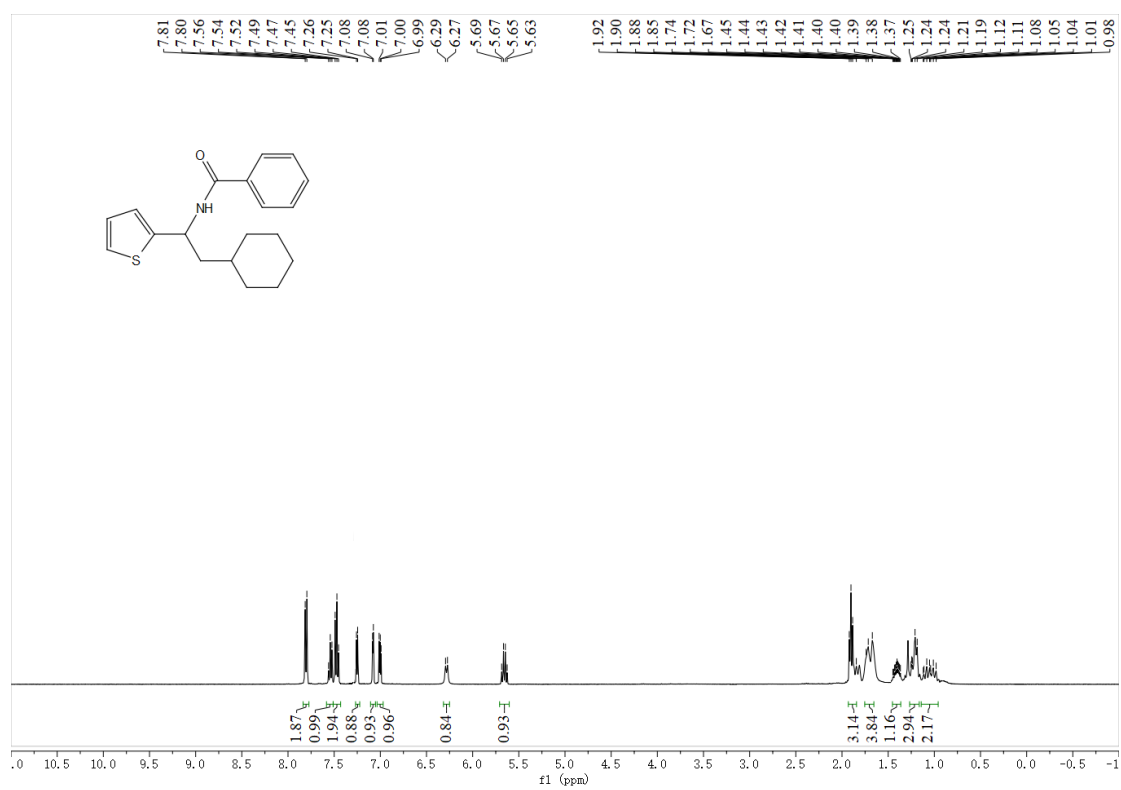

$^{13}\text{C}\{^1\text{H}\}$  NMR (101 MHz) Spectrum of **4eaa** in  $\text{CDCl}_3$

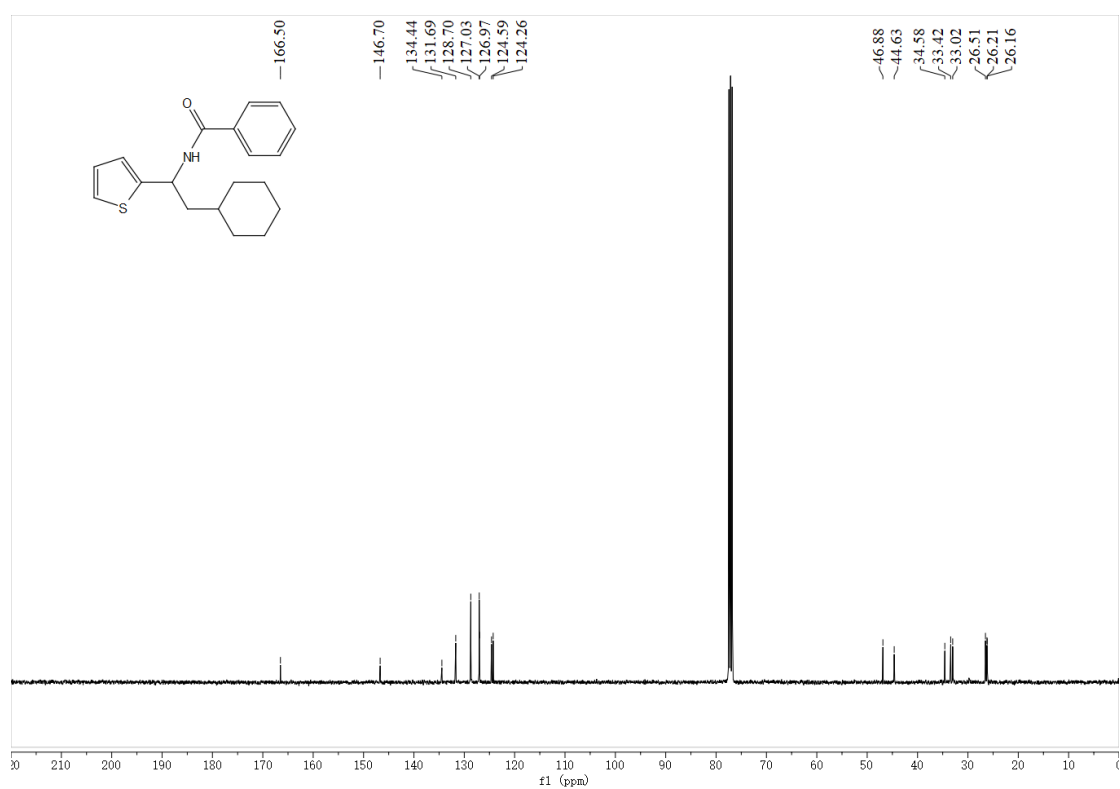

<sup>1</sup>H NMR (400 MHz) Spectrum of **4aba** in CDCl<sub>3</sub>

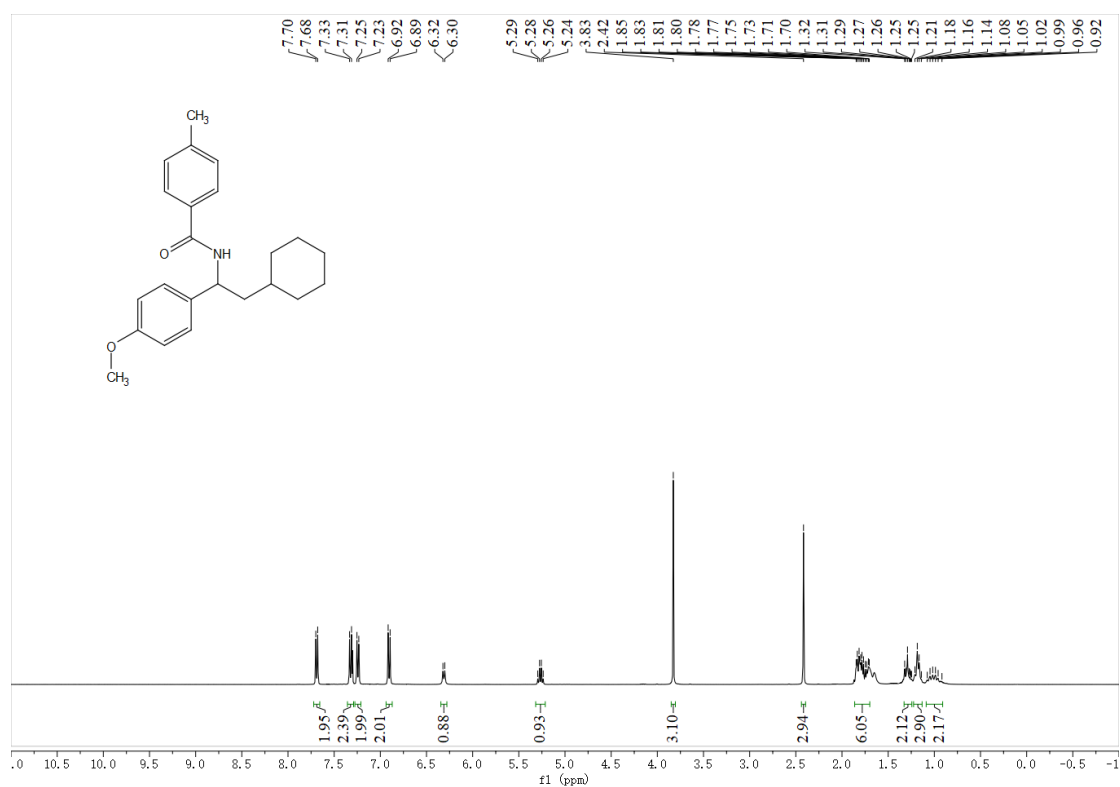

<sup>13</sup>C{<sup>1</sup>H} NMR (101 MHz) Spectrum of **4aba** in CDCl<sub>3</sub>

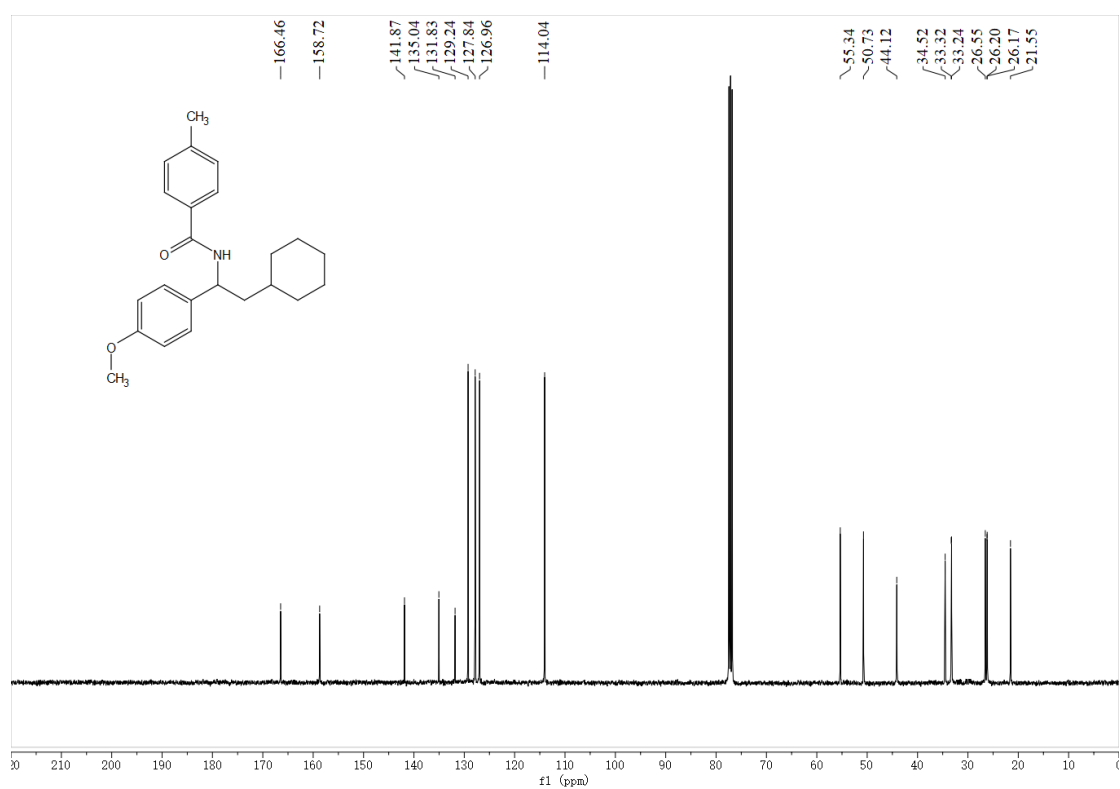

$^1\text{H}$  NMR (400 MHz) Spectrum of **4aca** in  $\text{CDCl}_3$

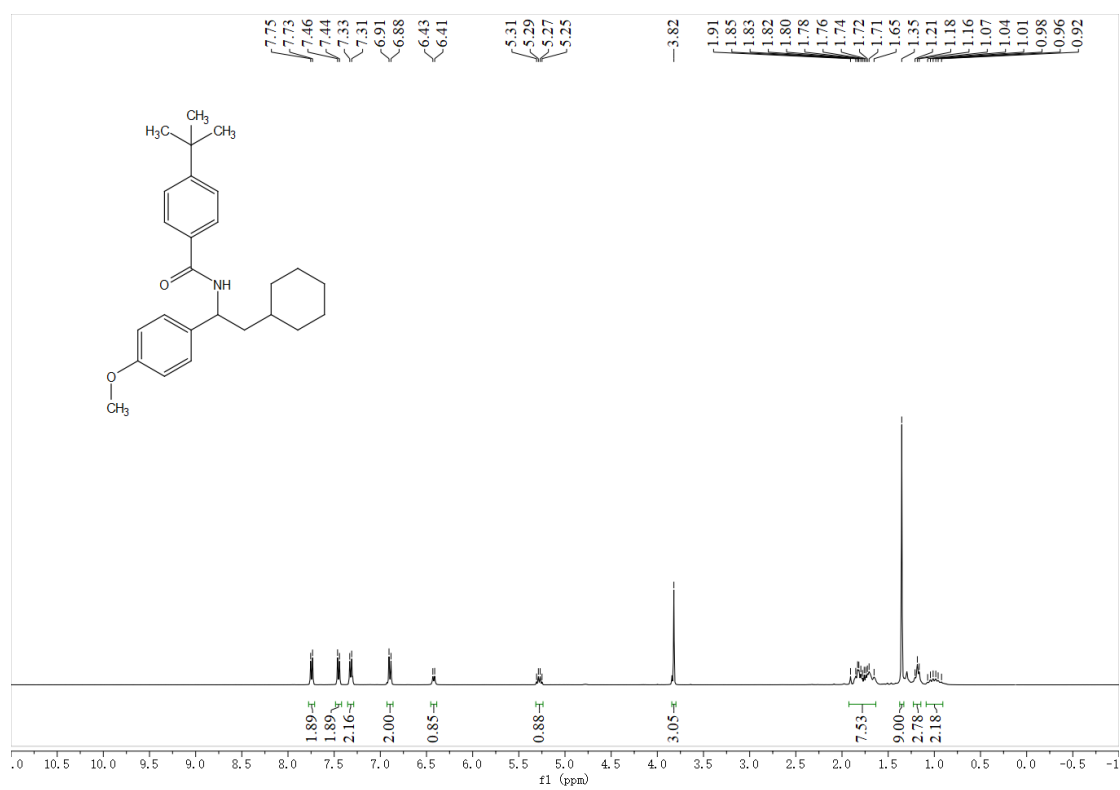

$^{13}\text{C}\{^1\text{H}\}$  NMR (101 MHz) Spectrum of **4aca** in  $\text{CDCl}_3$

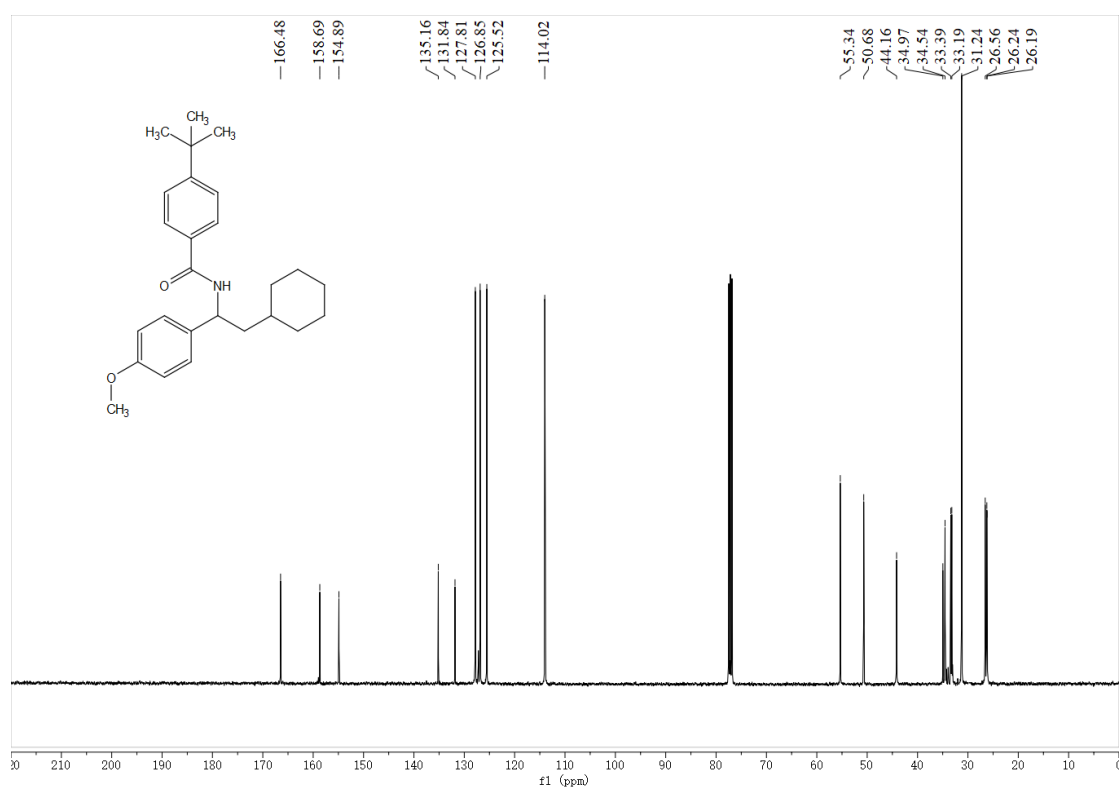

<sup>1</sup>H NMR (400 MHz) Spectrum of **4ada** in CDCl<sub>3</sub>

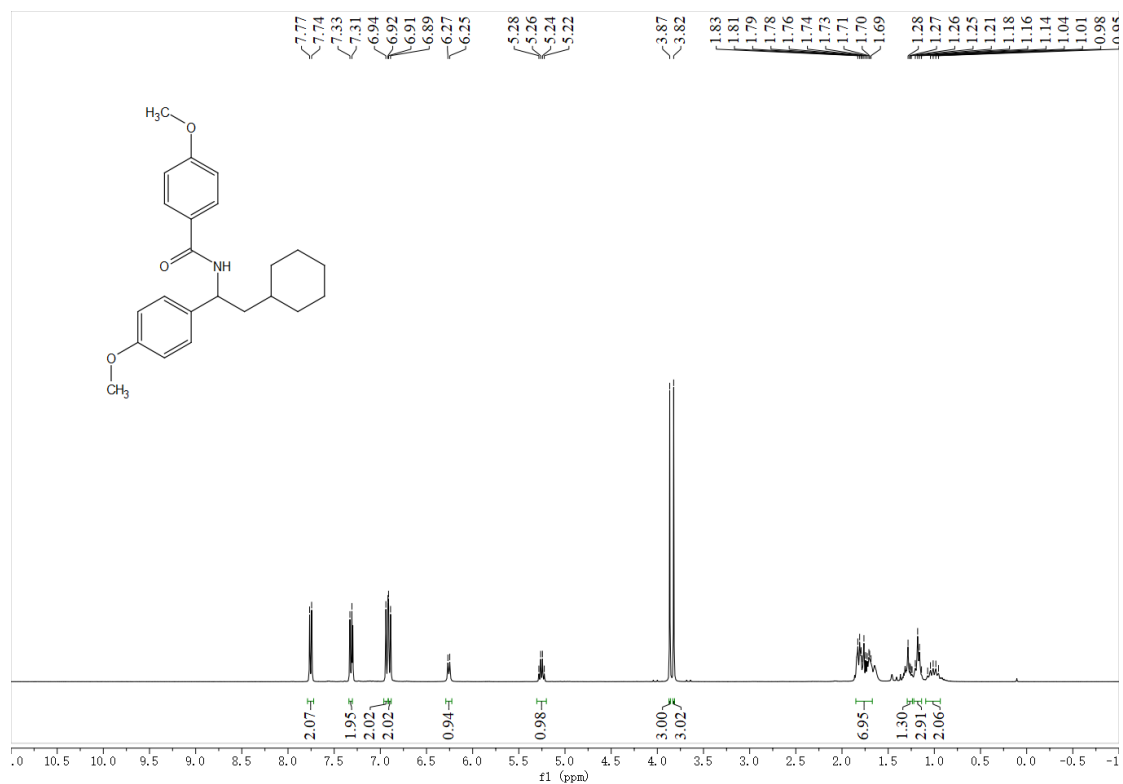

<sup>13</sup>C{<sup>1</sup>H} NMR (101 MHz) Spectrum of **4ada** in CDCl<sub>3</sub>

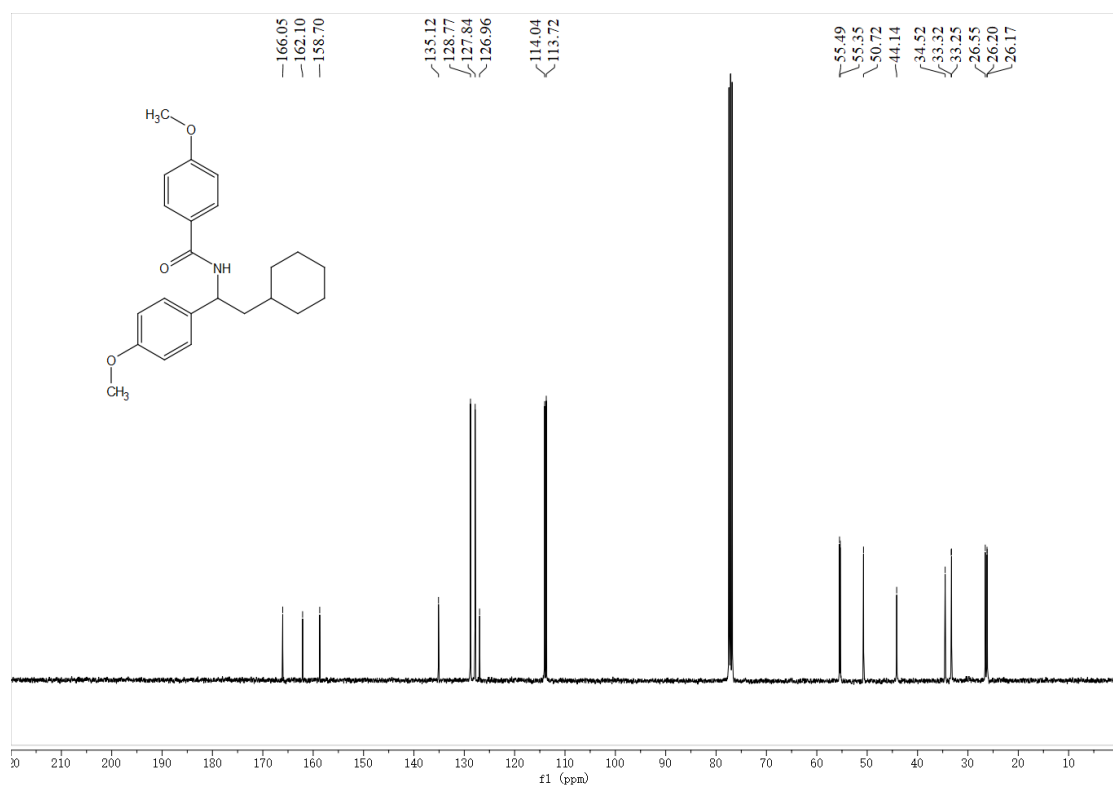

<sup>1</sup>H NMR (400 MHz) Spectrum of **4aea** in CDCl<sub>3</sub>

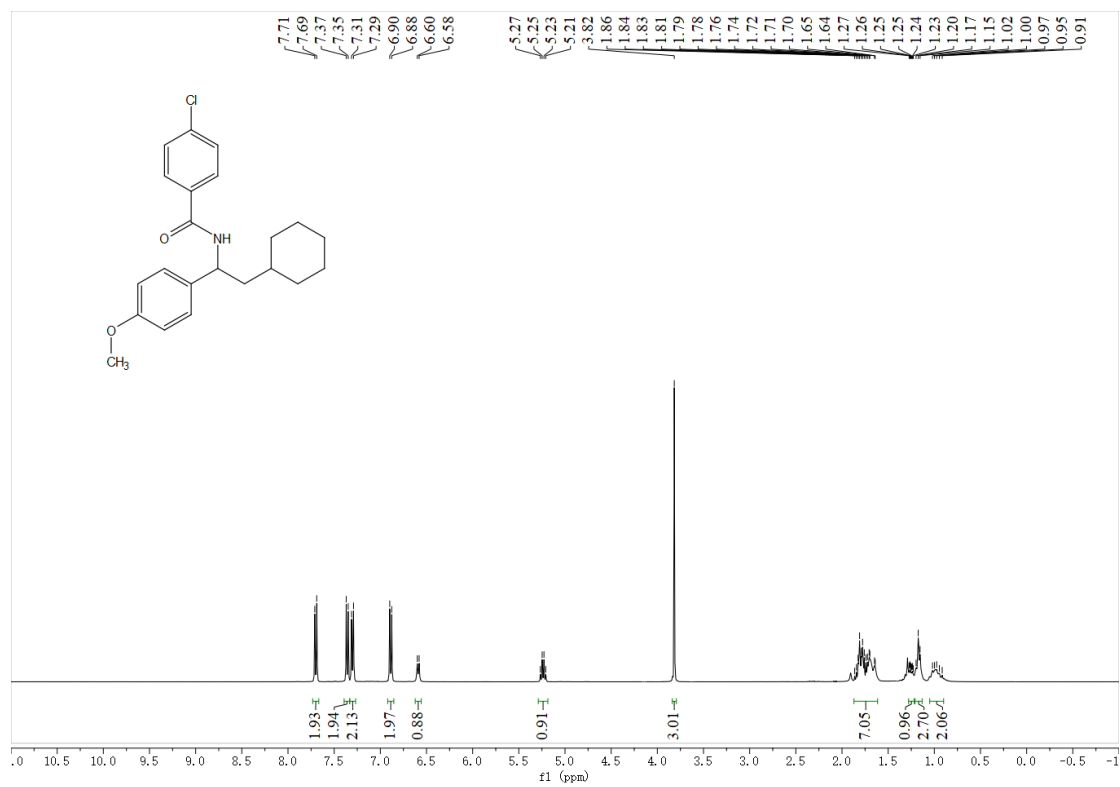

<sup>13</sup>C{<sup>1</sup>H} NMR (101 MHz) Spectrum of **4aea** in CDCl<sub>3</sub>

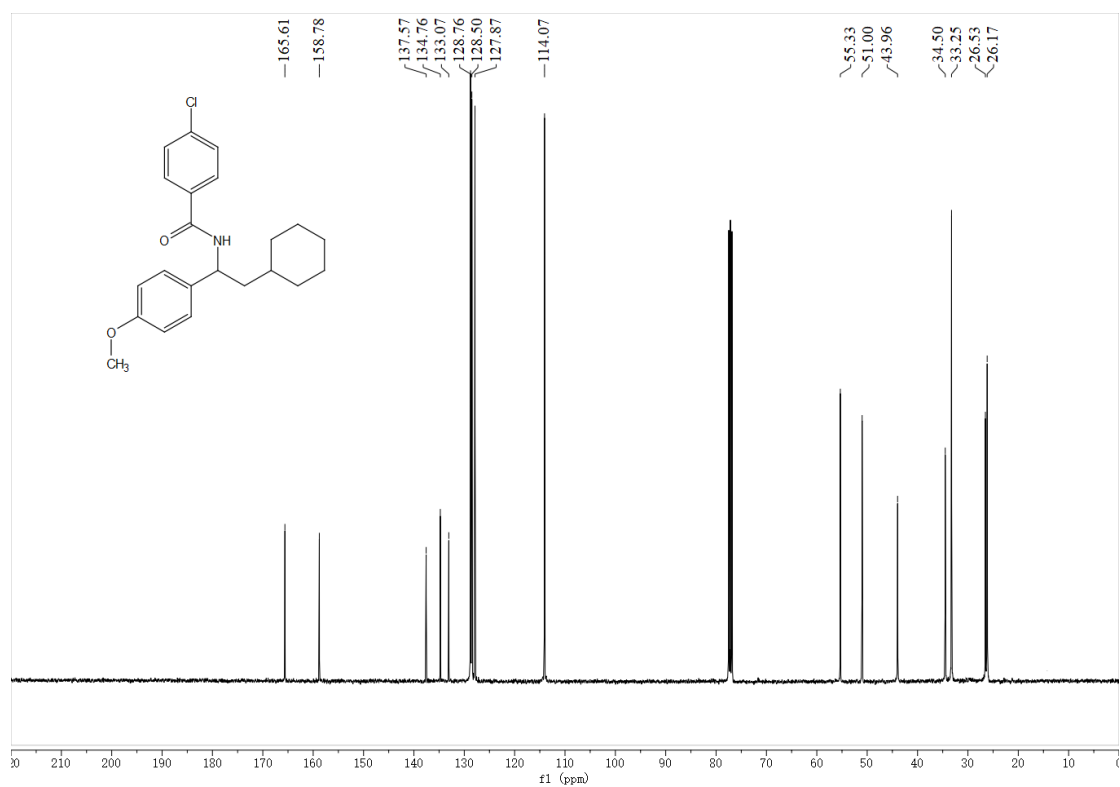

<sup>1</sup>H NMR (400 MHz) Spectrum of **4afa** in CDCl<sub>3</sub>

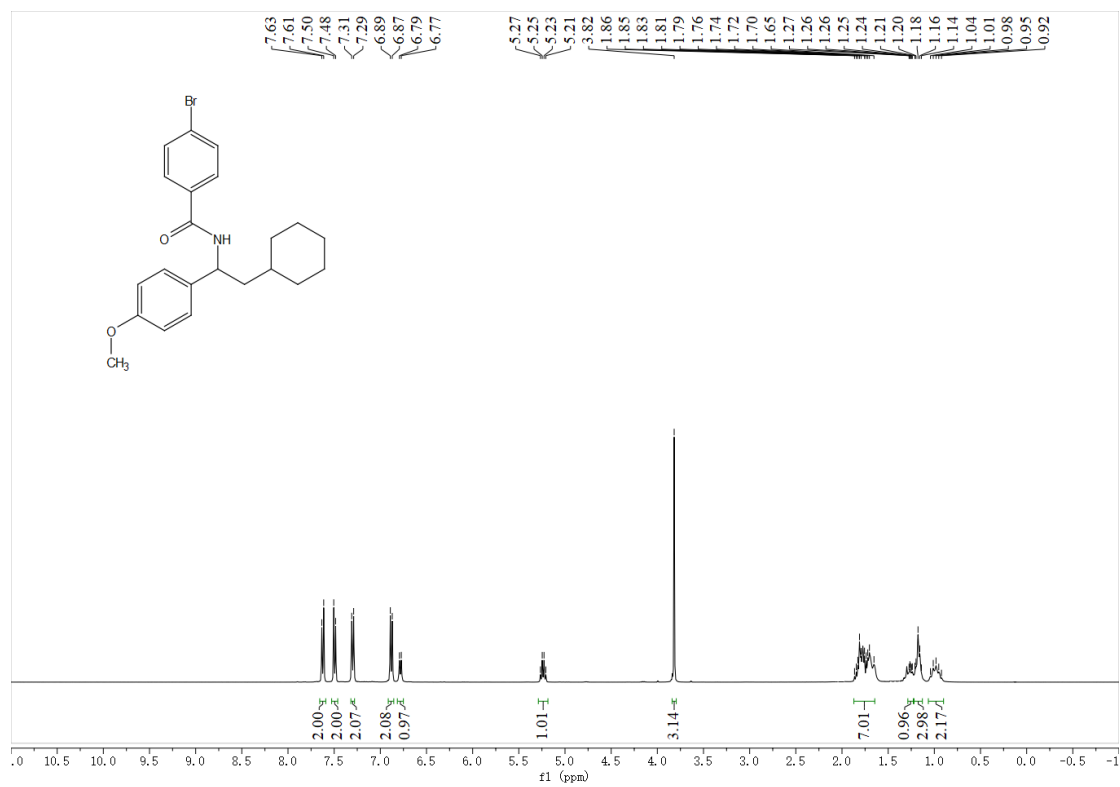

<sup>13</sup>C{<sup>1</sup>H} NMR (101 MHz) Spectrum of **4afa** in CDCl<sub>3</sub>

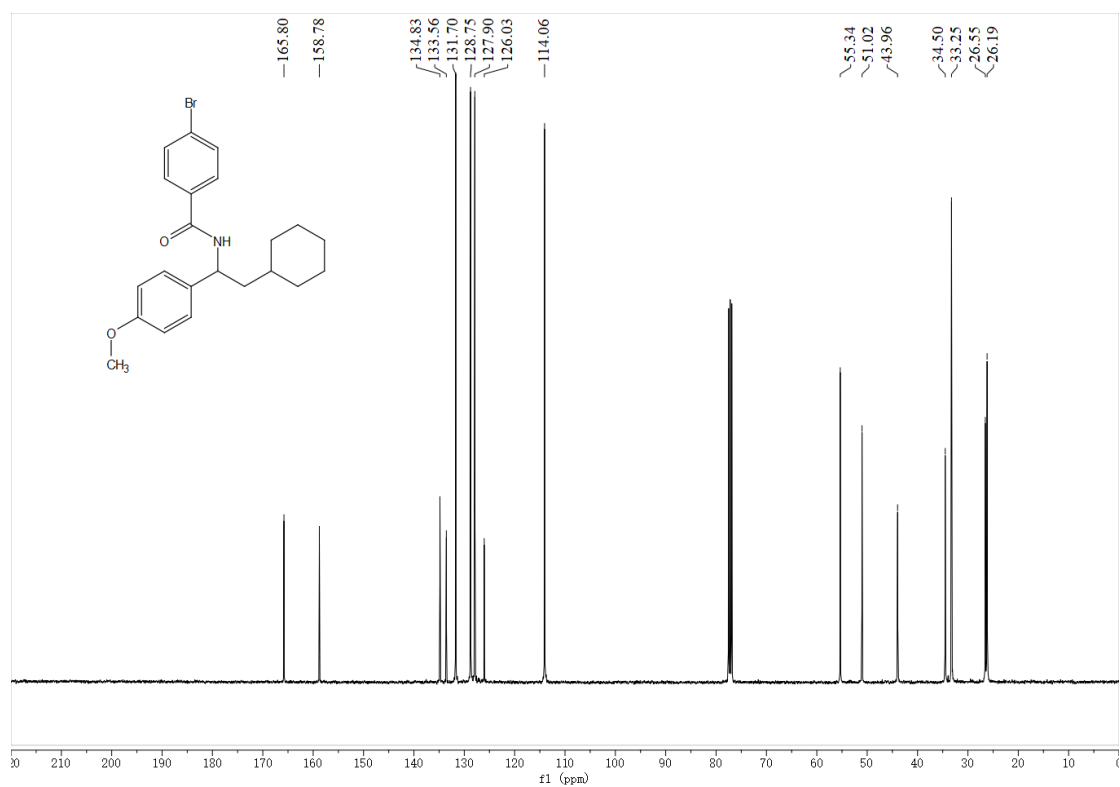

$^1\text{H}$  NMR (400 MHz) Spectrum of **4aga** in  $\text{CDCl}_3$

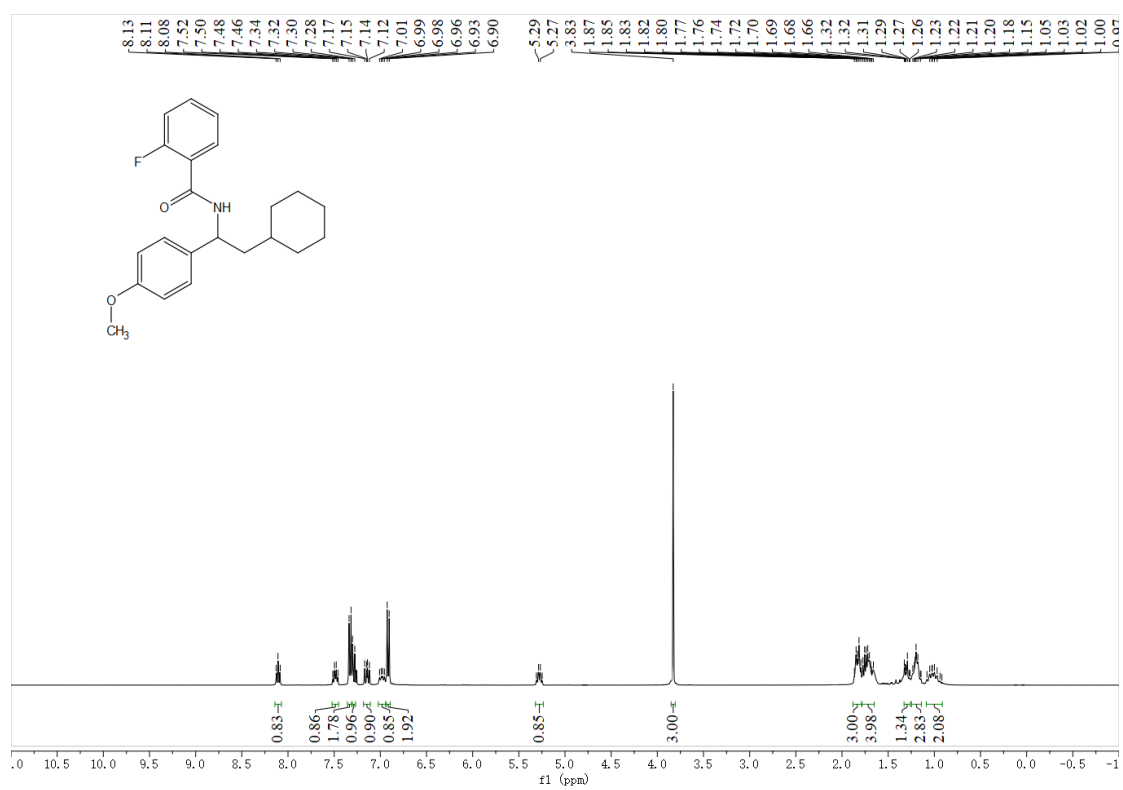

$^{13}\text{C}\{^1\text{H}\}$  NMR (101 MHz) Spectrum of **4aga** in  $\text{CDCl}_3$

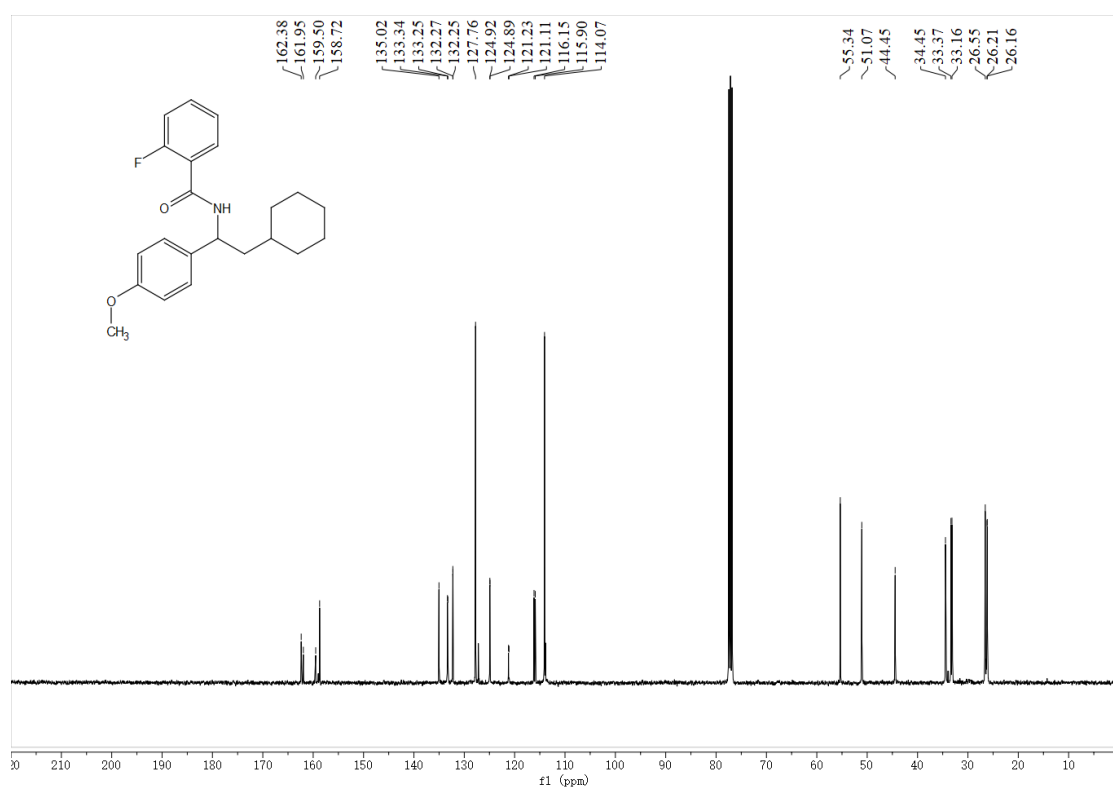



<sup>19</sup>F NMR (376 MHz) Spectrum of **4aga** in CDCl<sub>3</sub>

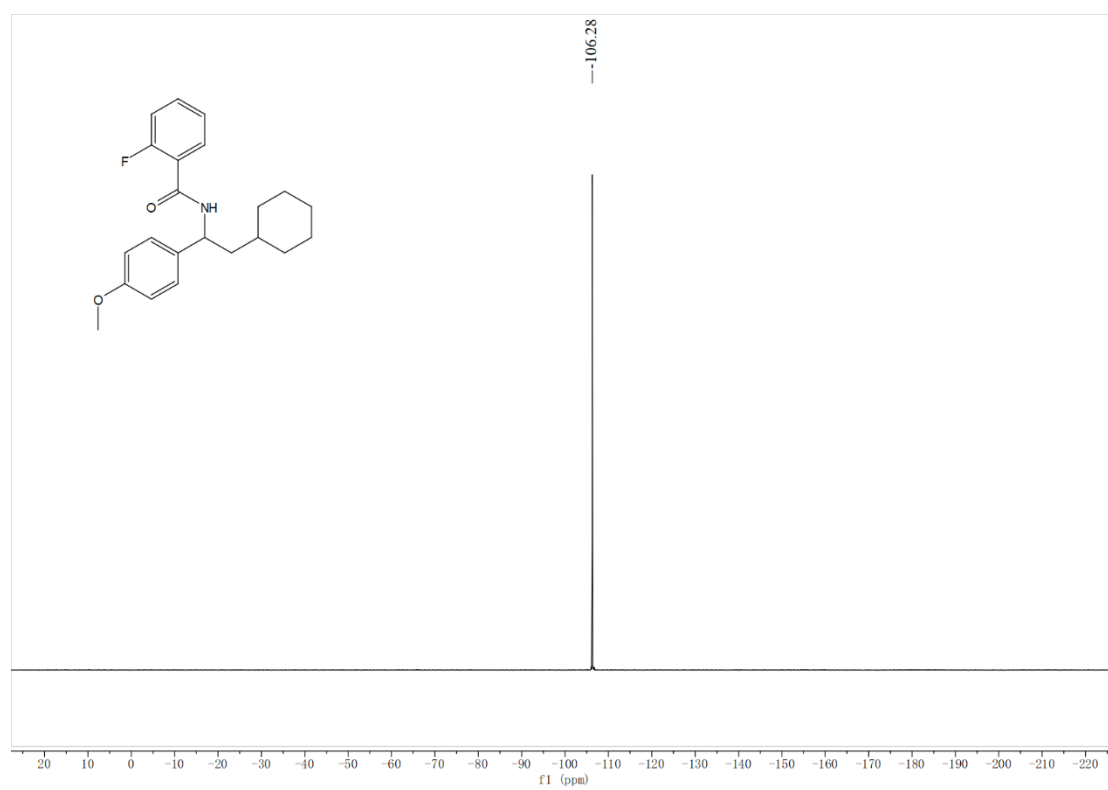

<sup>1</sup>H NMR (400 MHz) Spectrum of **4aha** in CDCl<sub>3</sub>

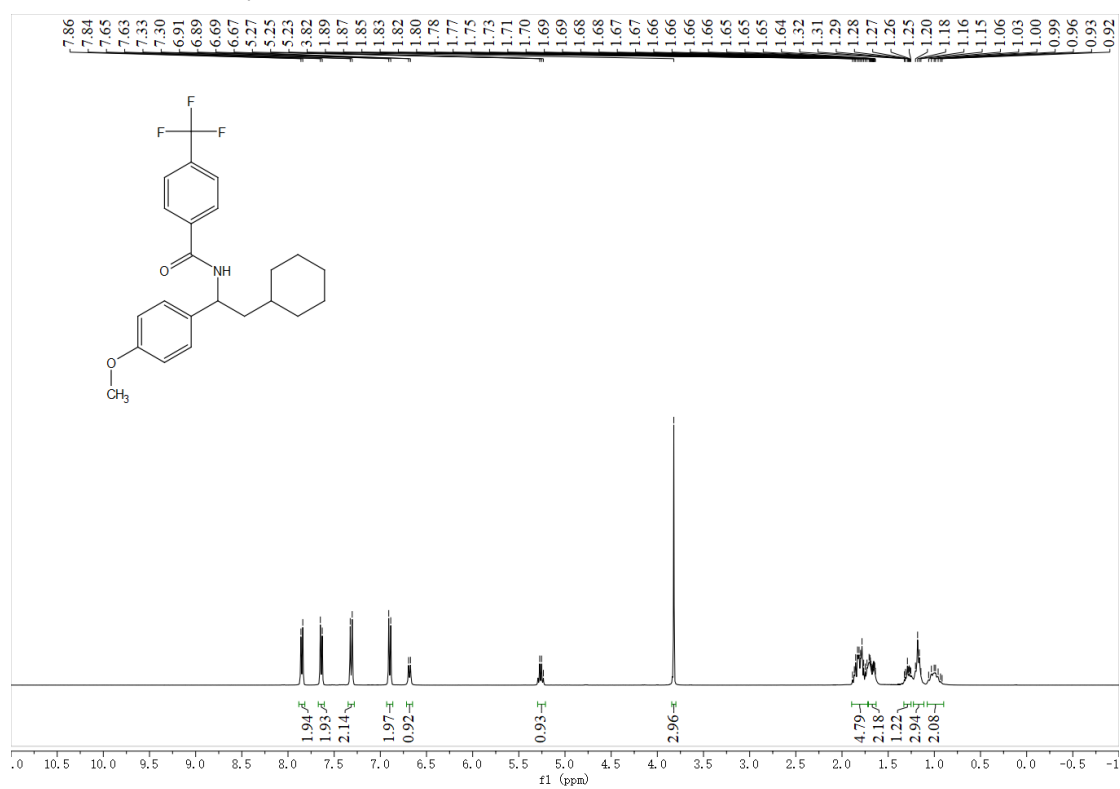

$^{13}\text{C}\{^1\text{H}\}$  NMR (101 MHz) Spectrum of **4aha** in  $\text{CDCl}_3$

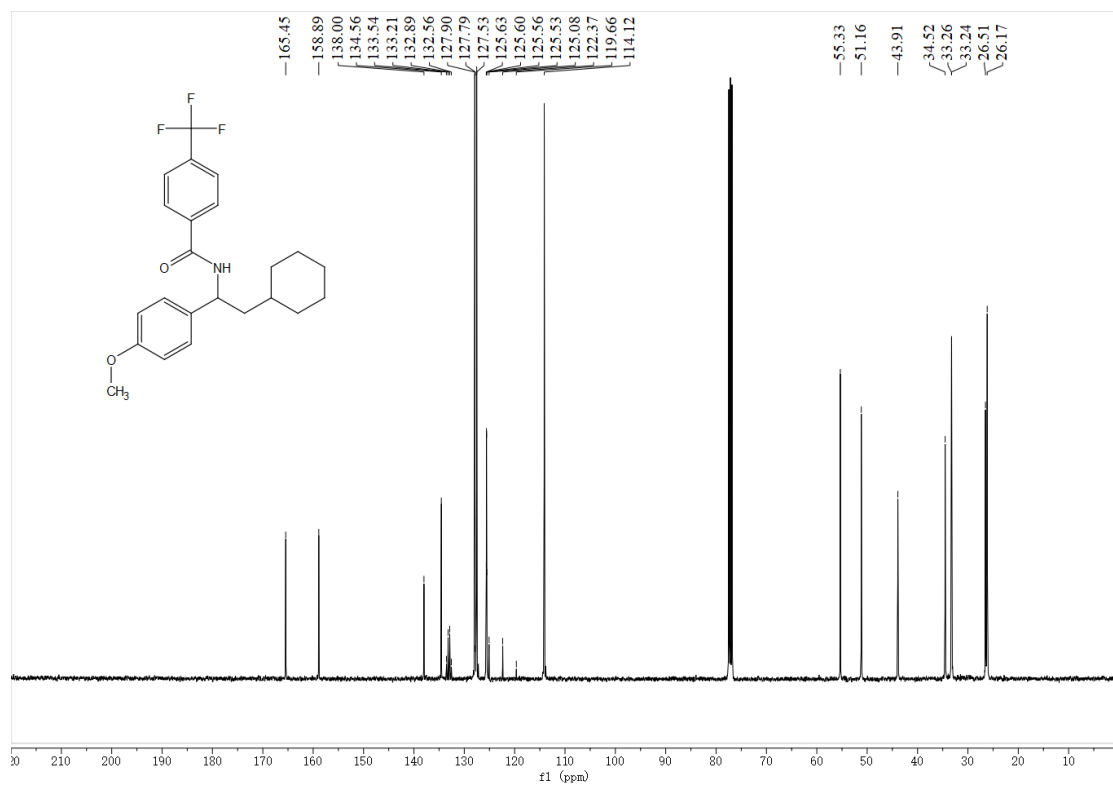

$^{19}\text{F}$  NMR (376 MHz) Spectrum of **4aha** in  $\text{CDCl}_3$

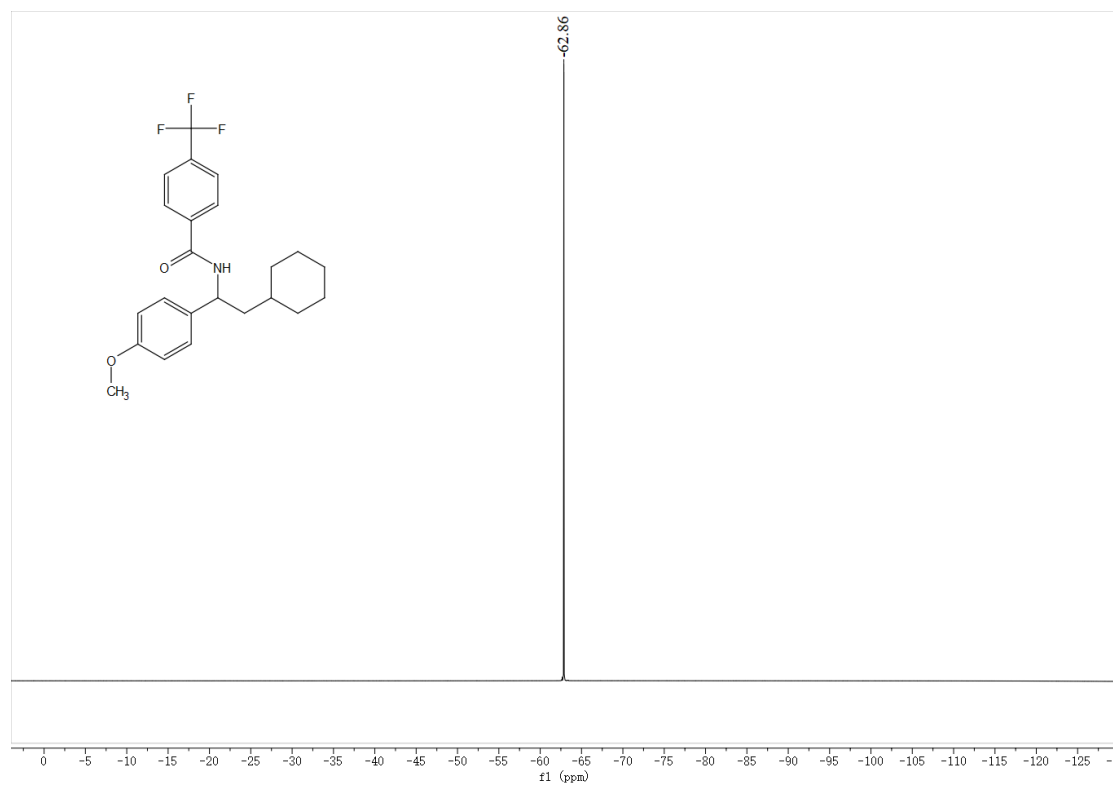

<sup>1</sup>H NMR (400 MHz) Spectrum of **4aia** in CDCl<sub>3</sub>

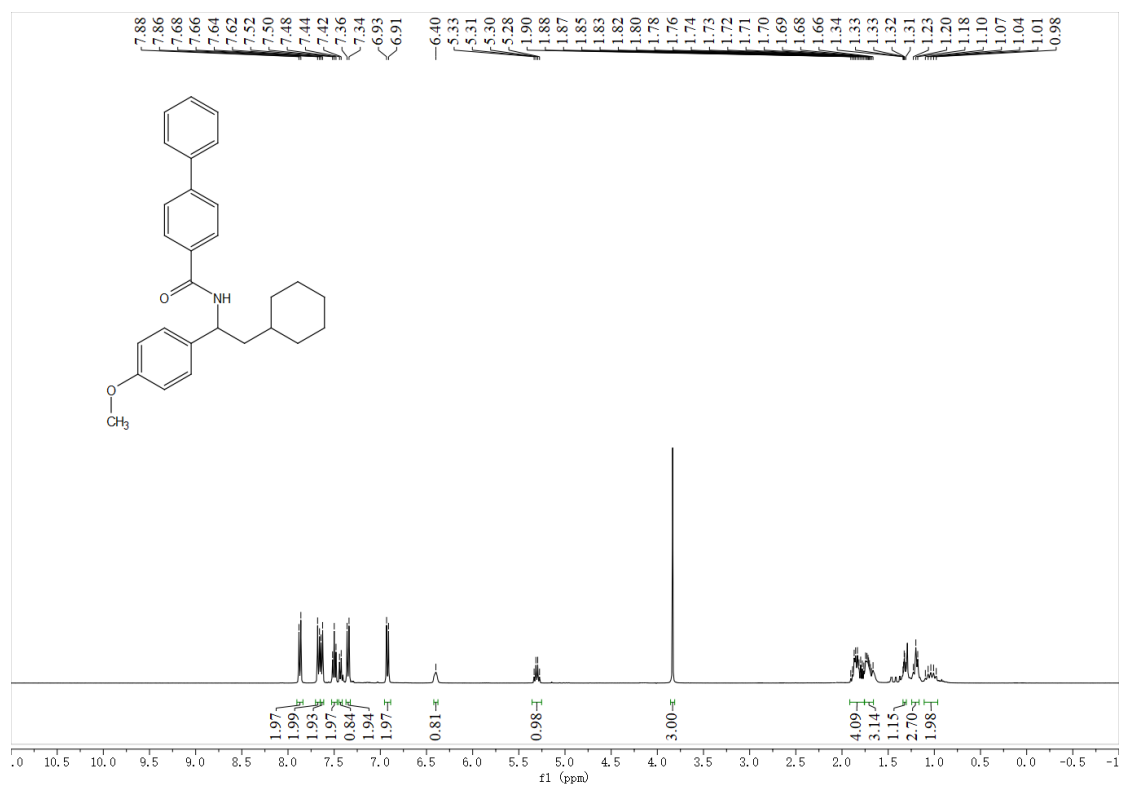

<sup>13</sup>C{<sup>1</sup>H} NMR (101 MHz) Spectrum of **4aia** in CDCl<sub>3</sub>

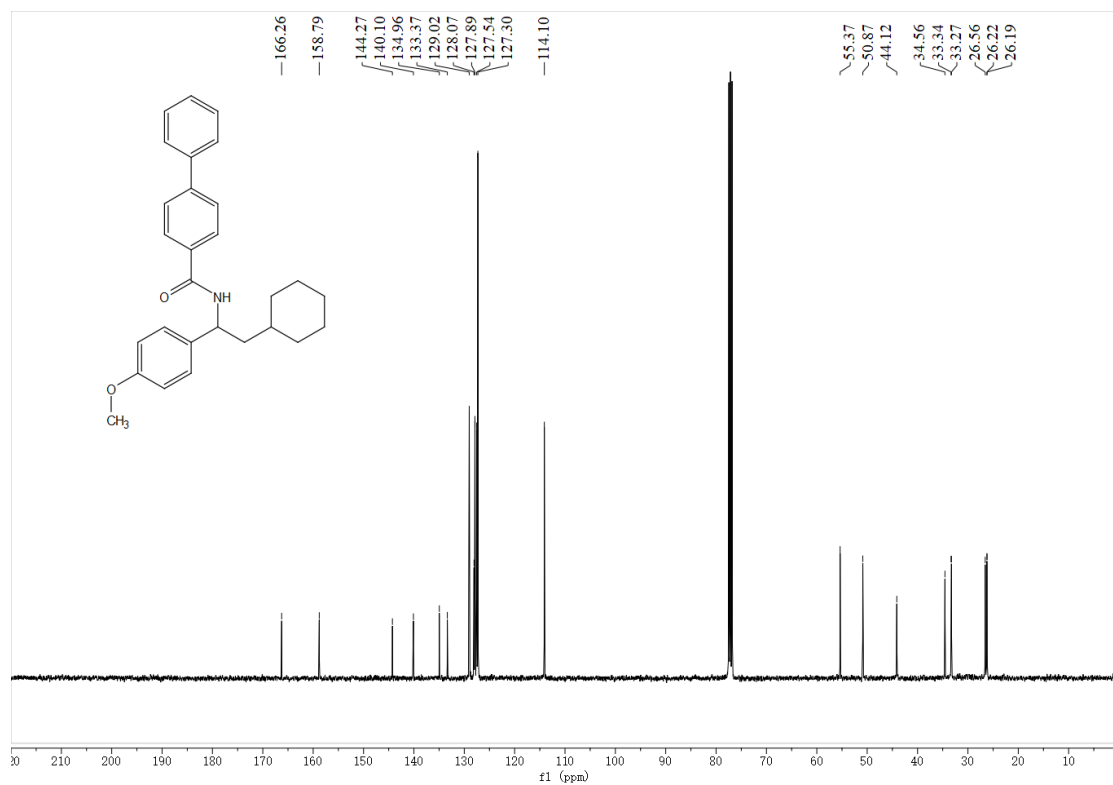

<sup>1</sup>H NMR (400 MHz) Spectrum of **4aja** in CDCl<sub>3</sub>

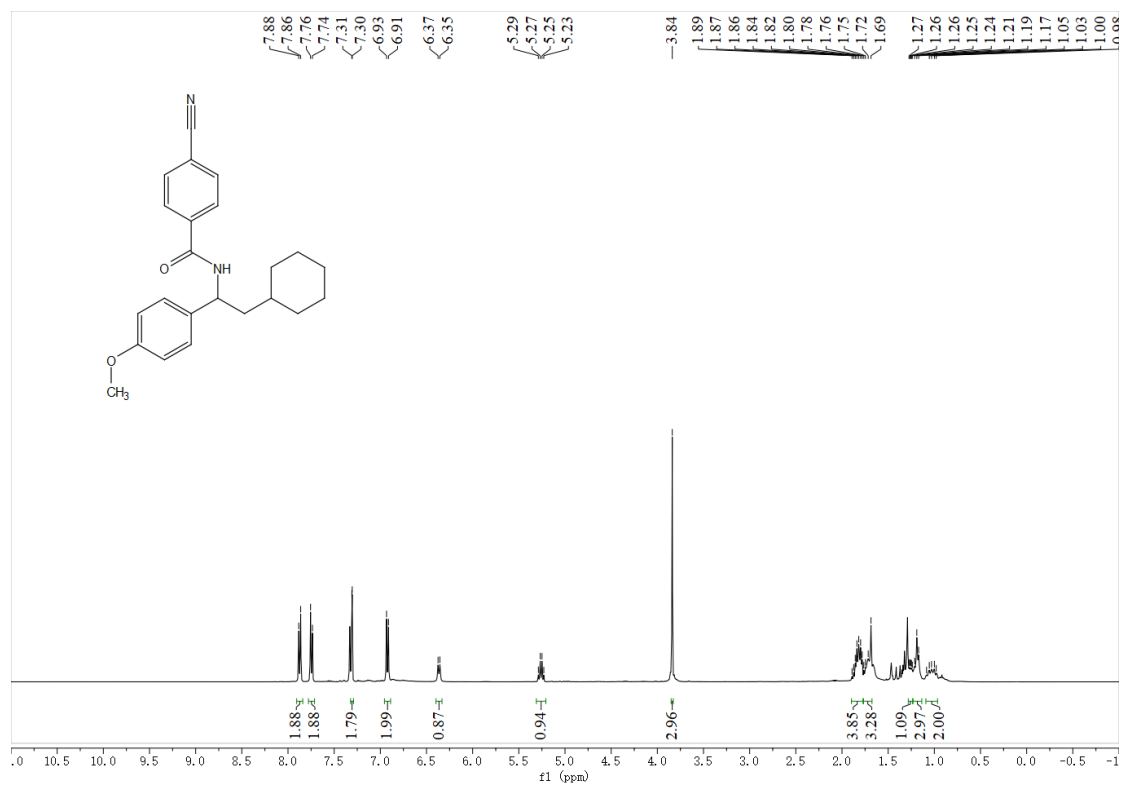

<sup>13</sup>C{<sup>1</sup>H} NMR (101 MHz) Spectrum of **4aja** in CDCl<sub>3</sub>

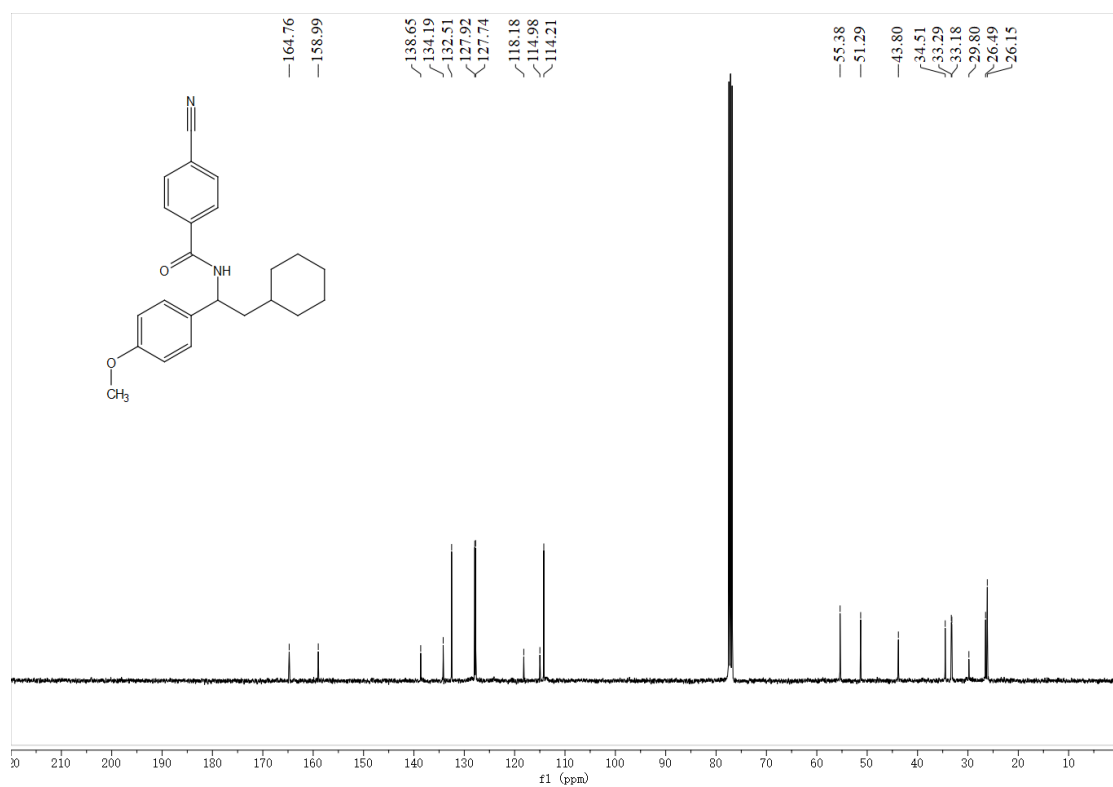

<sup>1</sup>H NMR (400 MHz) Spectrum of **4aka** in CDCl<sub>3</sub>

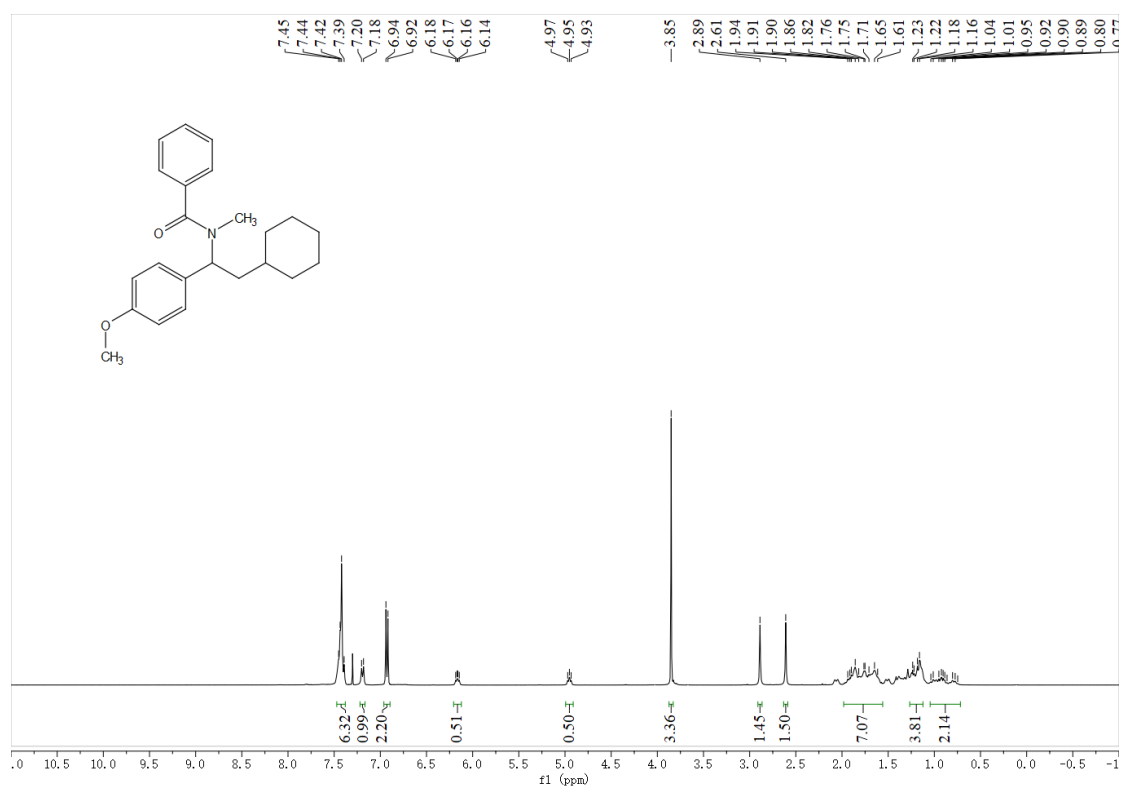

<sup>13</sup>C{<sup>1</sup>H} NMR (101 MHz) Spectrum of **4aka** in CDCl<sub>3</sub>

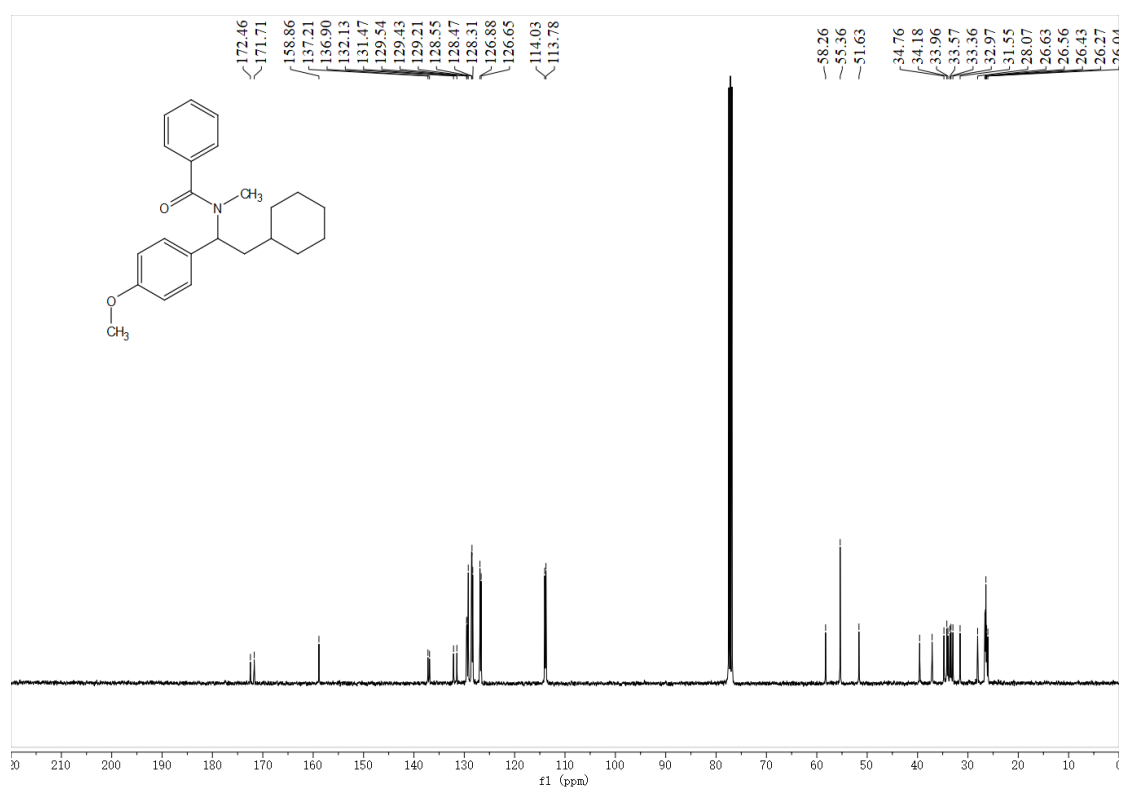

<sup>1</sup>H NMR (400 MHz) Spectrum of **4a1a** in CDCl<sub>3</sub>

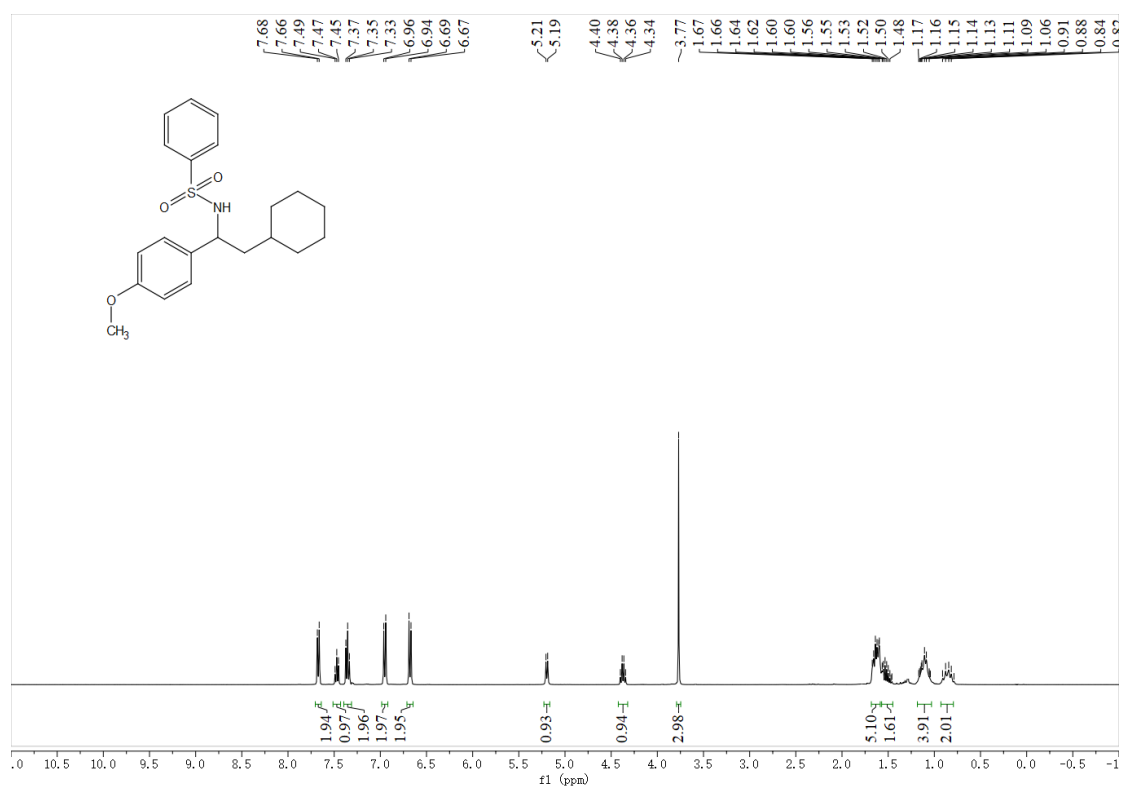

<sup>13</sup>C{<sup>1</sup>H} NMR (101 MHz) Spectrum of **4a1a** in CDCl<sub>3</sub>

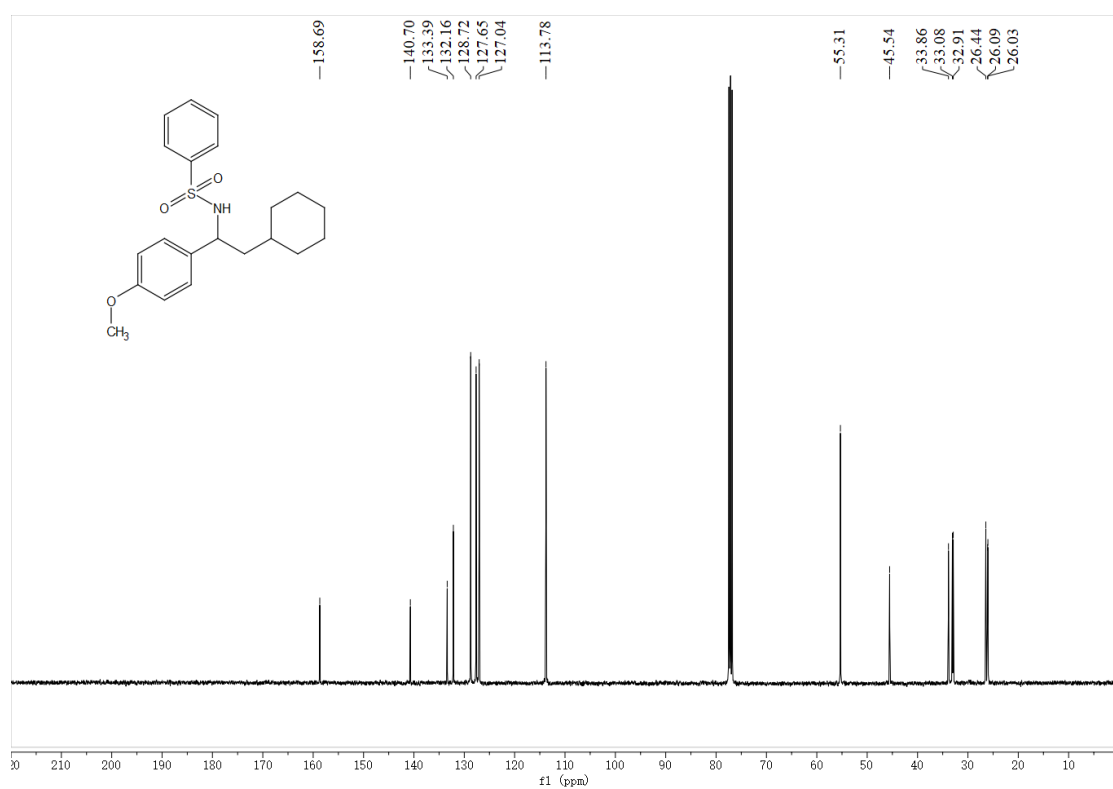

$^1\text{H}$  NMR (400 MHz) Spectrum of **4ama** in  $\text{CDCl}_3$

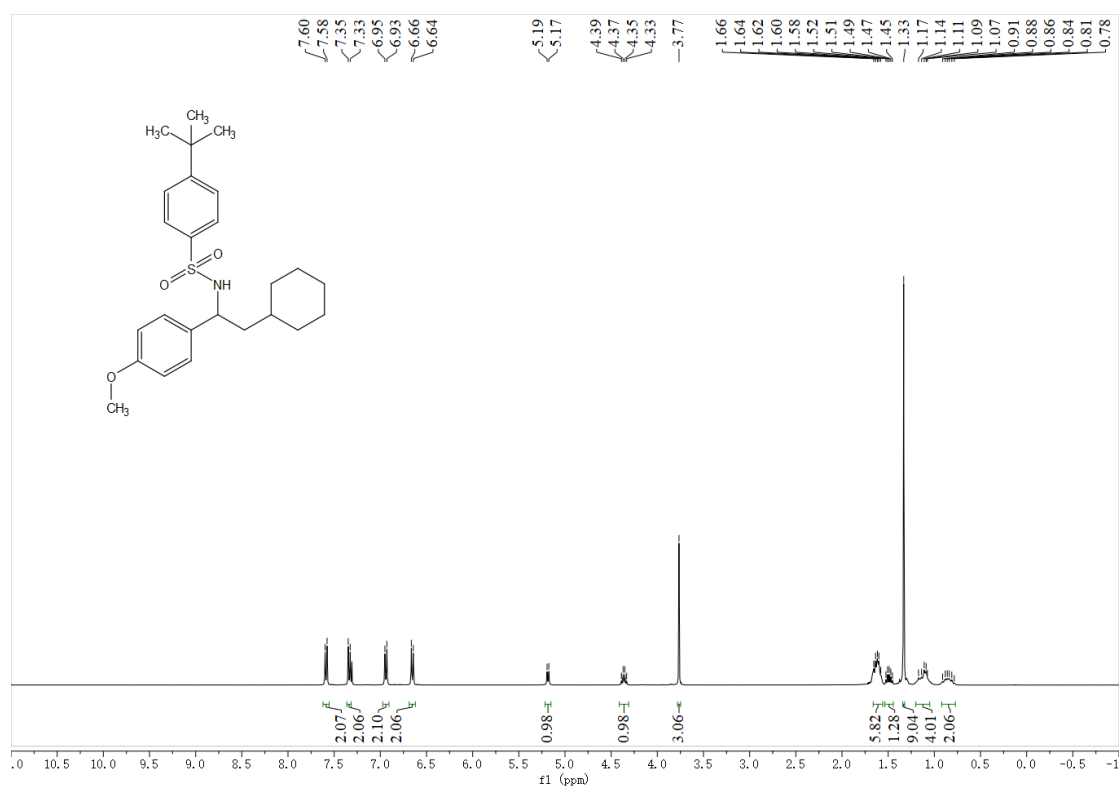

$^{13}\text{C}\{^1\text{H}\}$  NMR (101 MHz) Spectrum of **4ama** in  $\text{CDCl}_3$

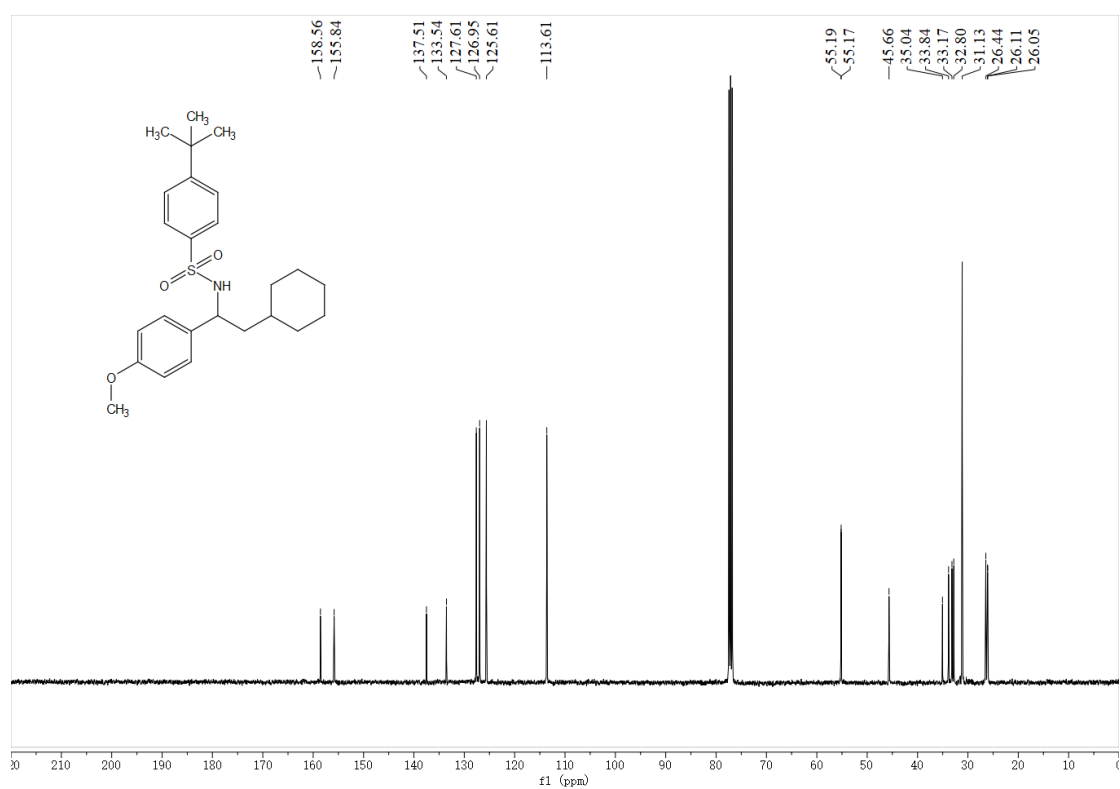

<sup>1</sup>H NMR (400 MHz) Spectrum of **4ana** in CDCl<sub>3</sub>

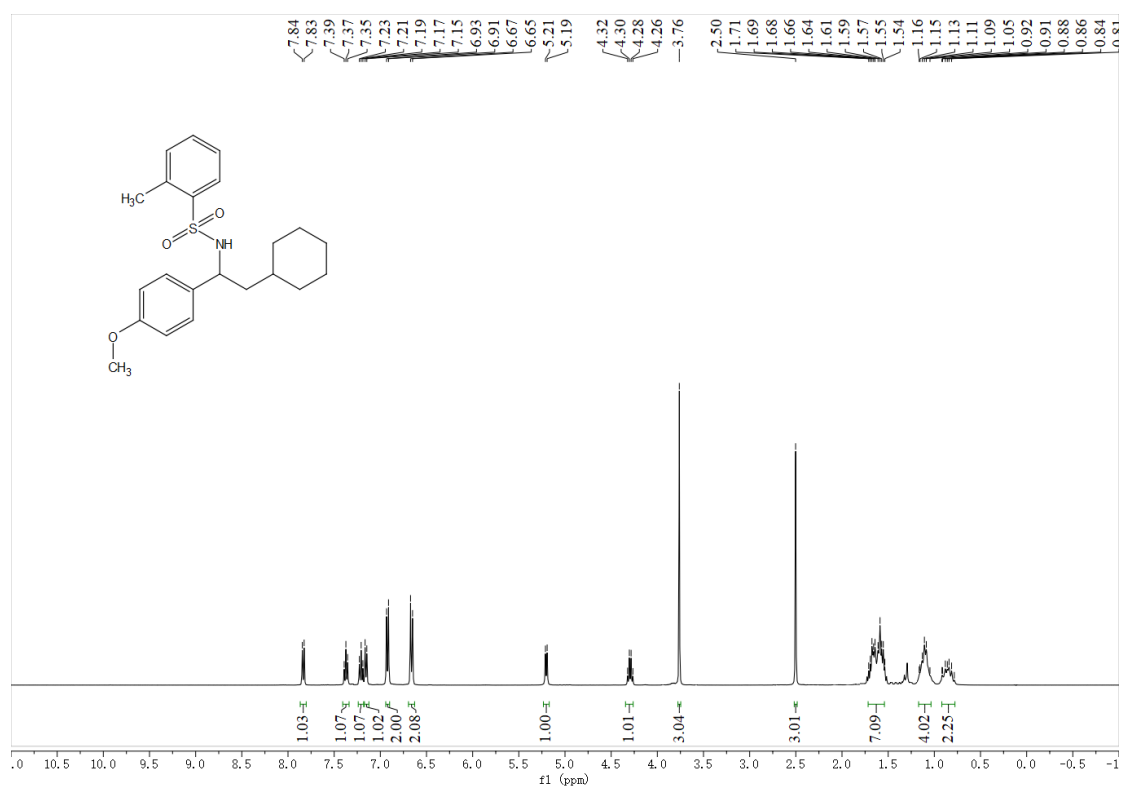

<sup>13</sup>C{<sup>1</sup>H} NMR (101 MHz) Spectrum of **4ana** in CDCl<sub>3</sub>

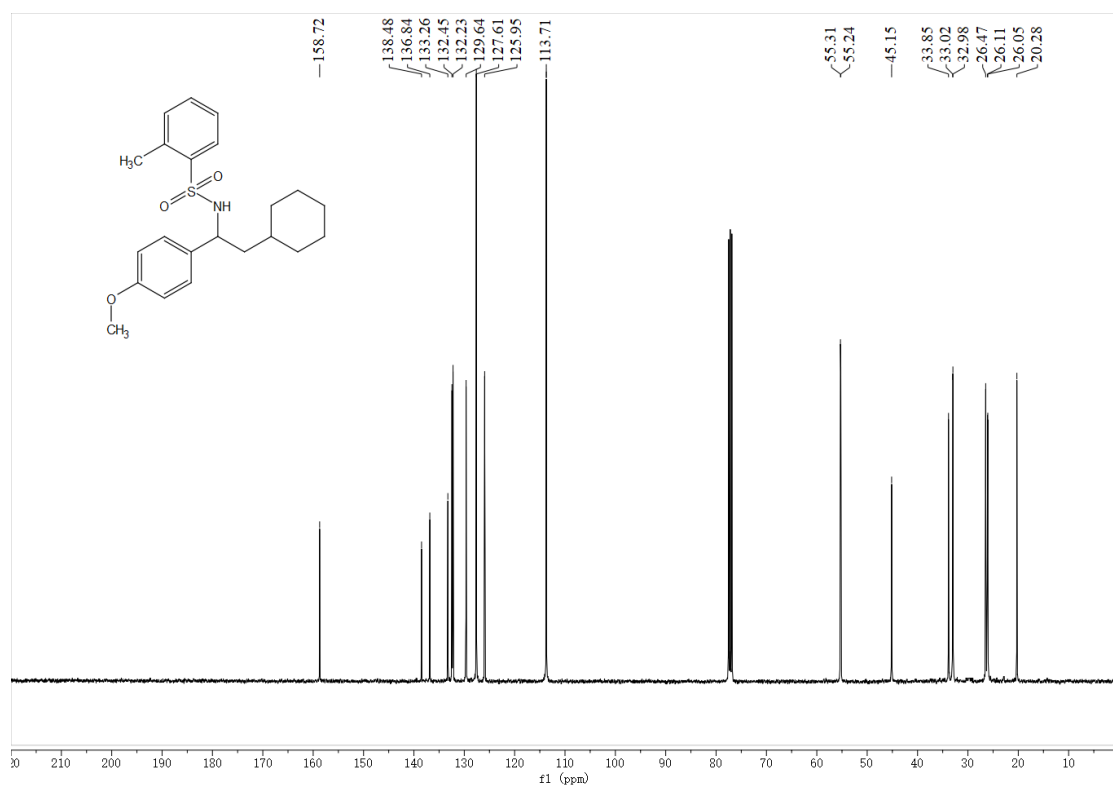



<sup>1</sup>H NMR (400 MHz) Spectrum of **4a0a** in CDCl<sub>3</sub>

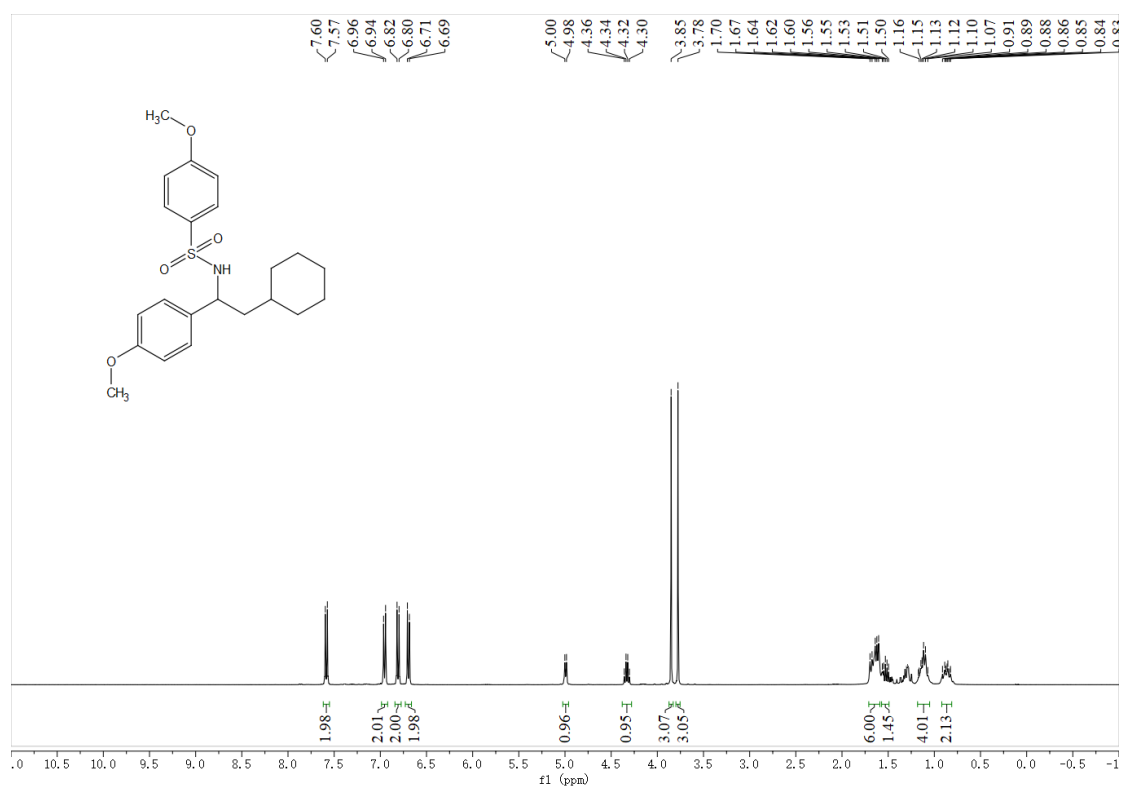

<sup>13</sup>C{<sup>1</sup>H} NMR (101 MHz) Spectrum of **4a0a** in CDCl<sub>3</sub>

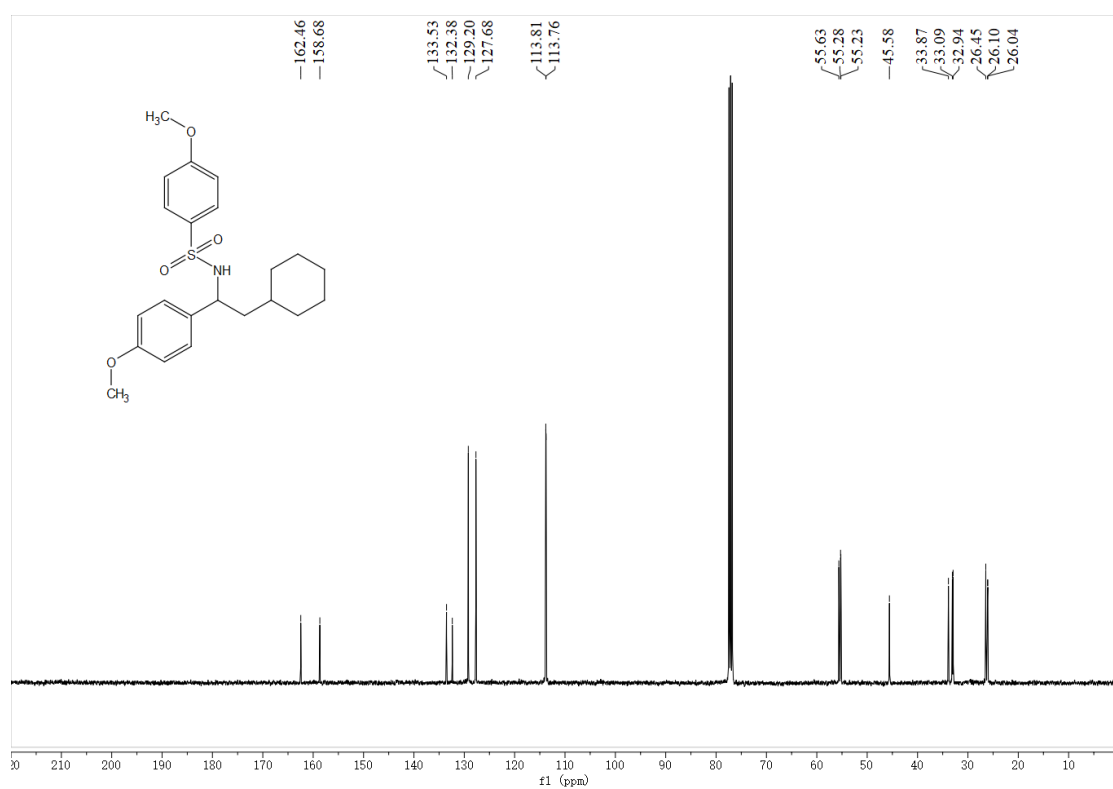

<sup>1</sup>H NMR (400 MHz) Spectrum of **4apa** in CDCl<sub>3</sub>

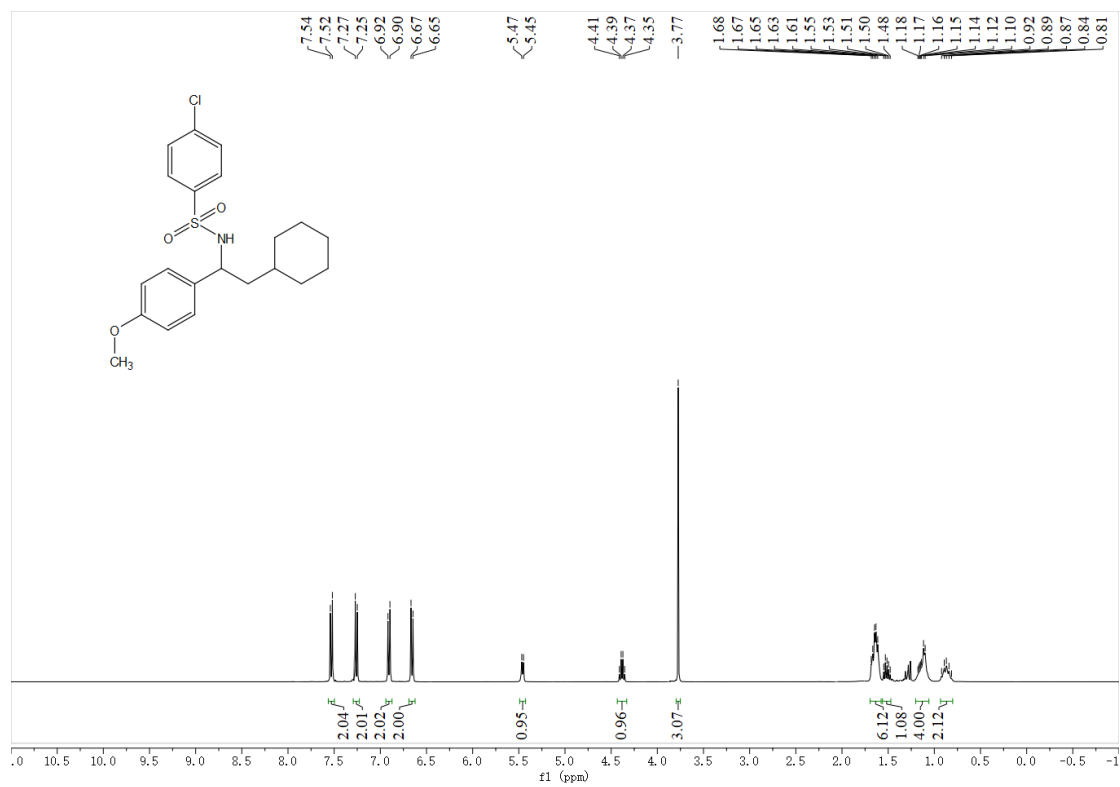

<sup>13</sup>C{<sup>1</sup>H} NMR (101 MHz) Spectrum of **4apa** in CDCl<sub>3</sub>

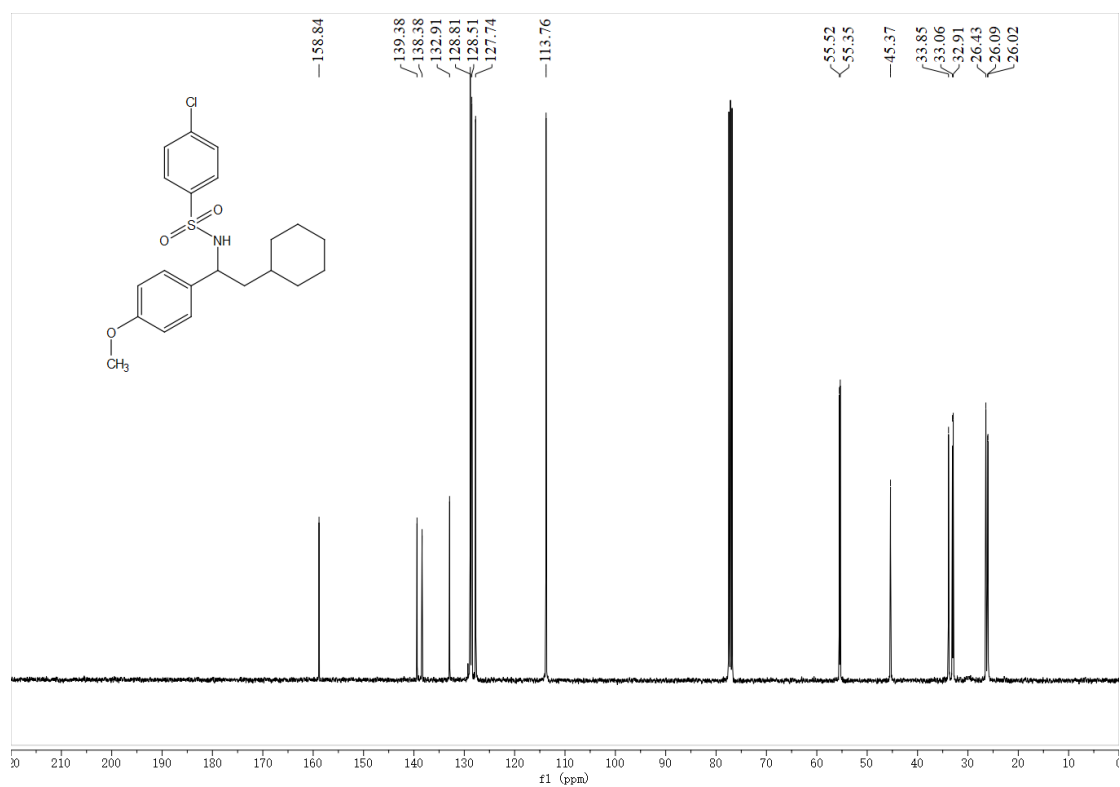

<sup>1</sup>H NMR (400 MHz) Spectrum of **4aqa** in CDCl<sub>3</sub>

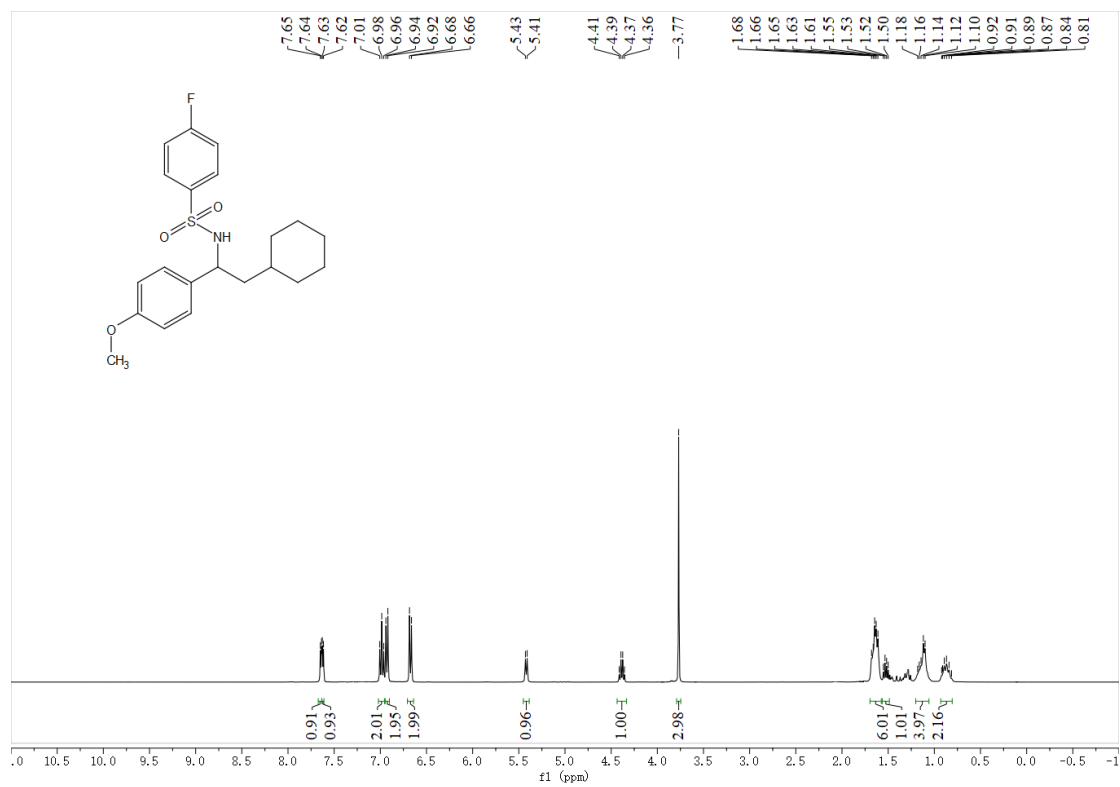

<sup>13</sup>C{<sup>1</sup>H} NMR (101 MHz) Spectrum of **4aqa** in CDCl<sub>3</sub>

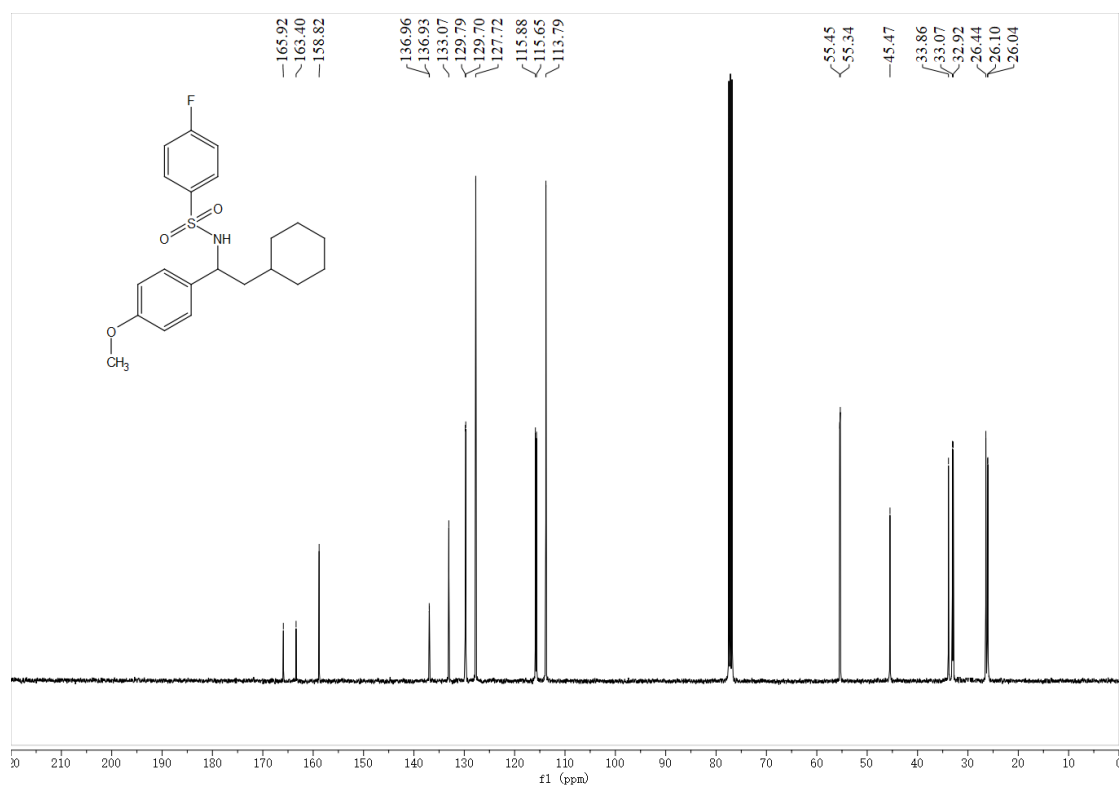

<sup>19</sup>F NMR (376 MHz) Spectrum of **4aqa** in CDCl<sub>3</sub>

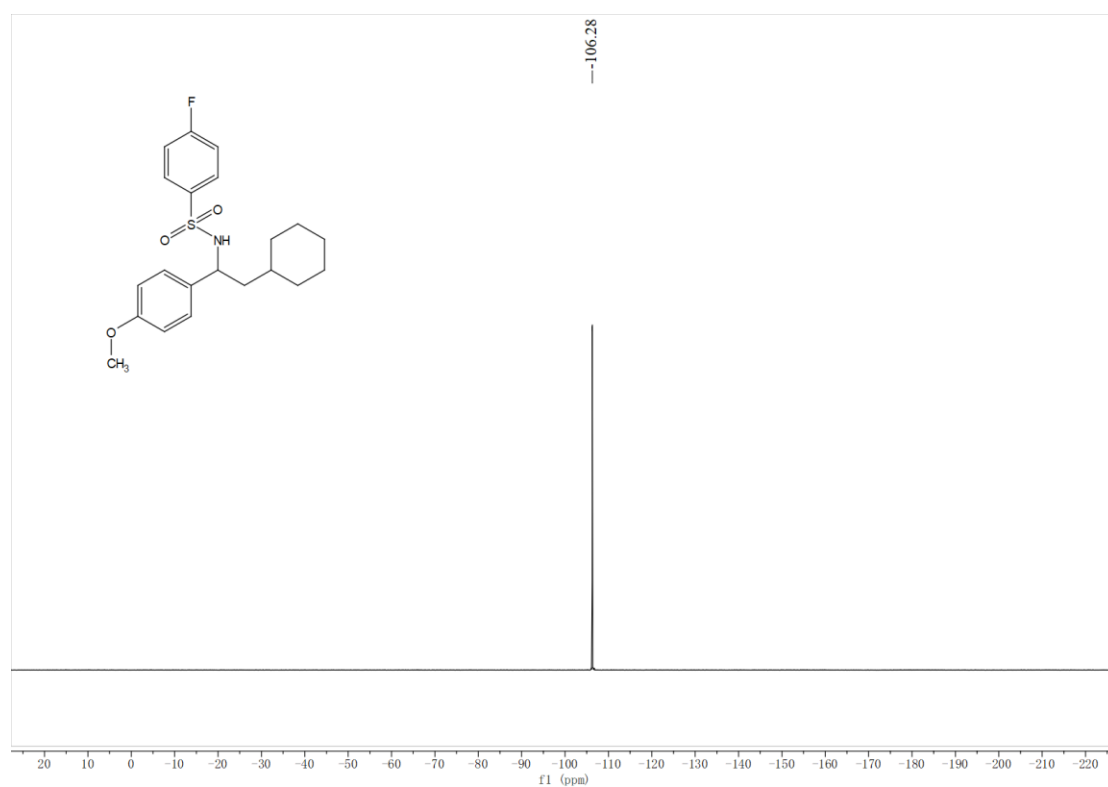

<sup>1</sup>H NMR (400 MHz) Spectrum of **4ara** in CDCl<sub>3</sub>

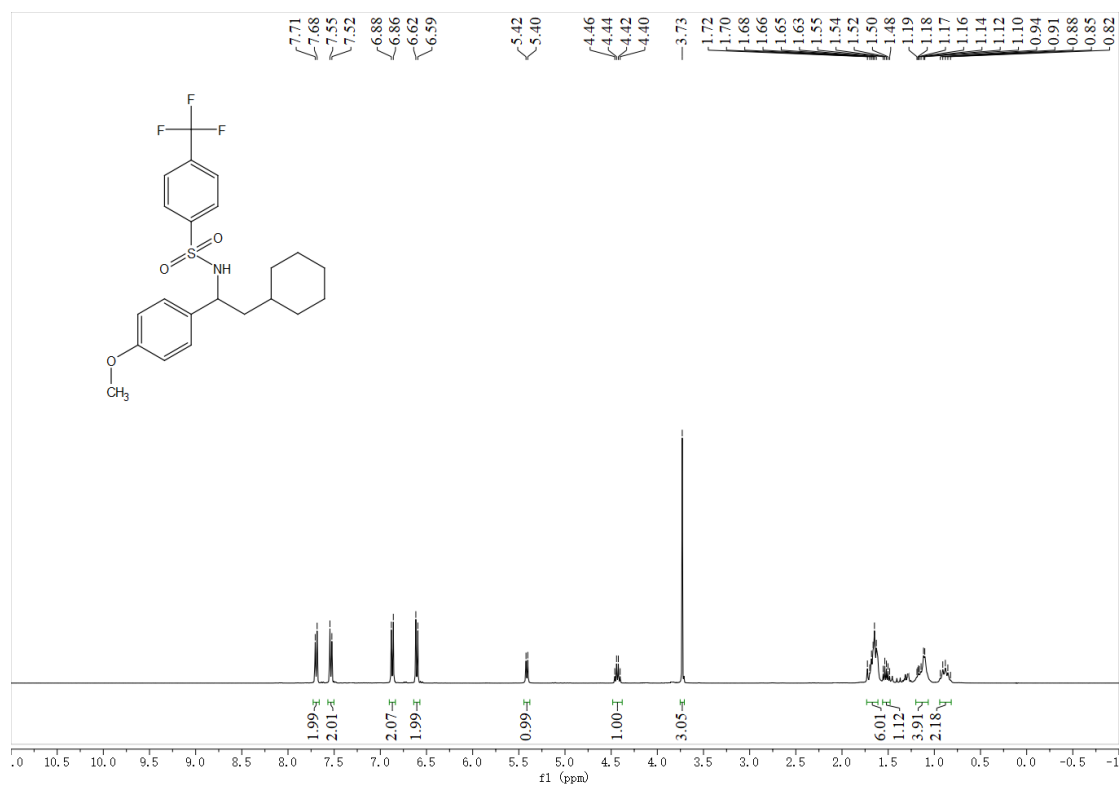

$^{13}\text{C}\{^1\text{H}\}$  NMR (101 MHz) Spectrum of **4ara** in  $\text{CDCl}_3$

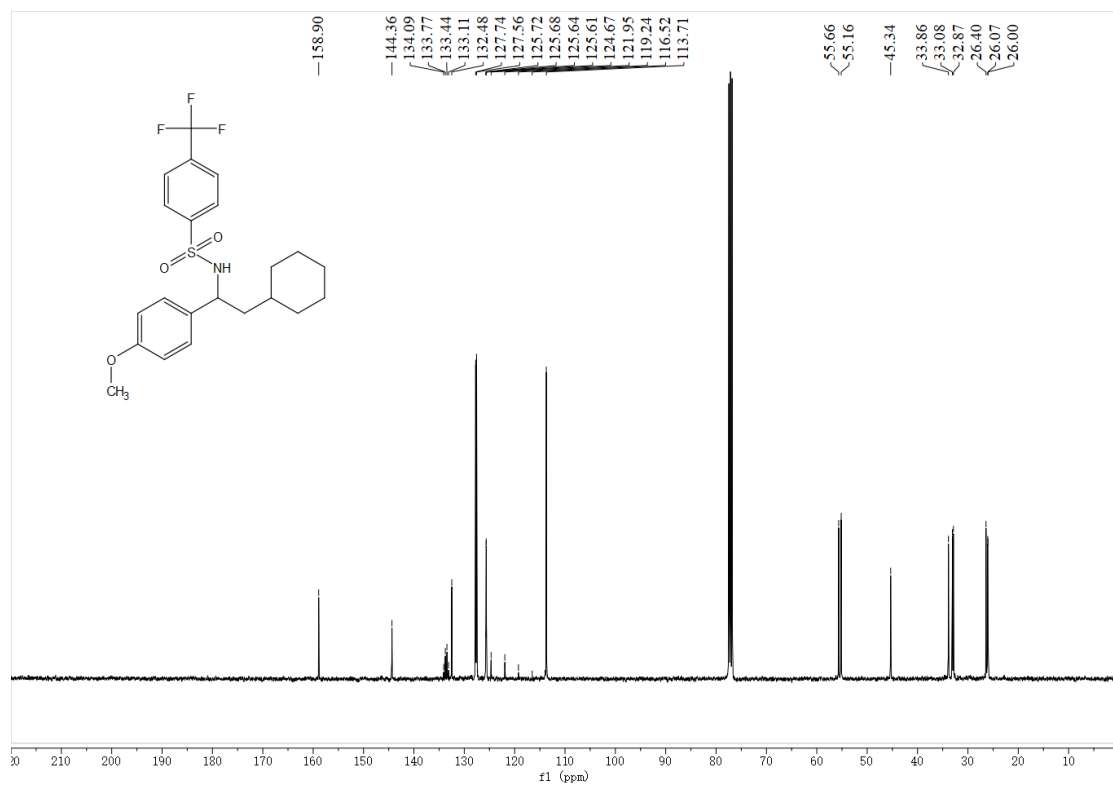

$^{19}\text{F}$  NMR (376 MHz) Spectrum of **4ara** in  $\text{CDCl}_3$

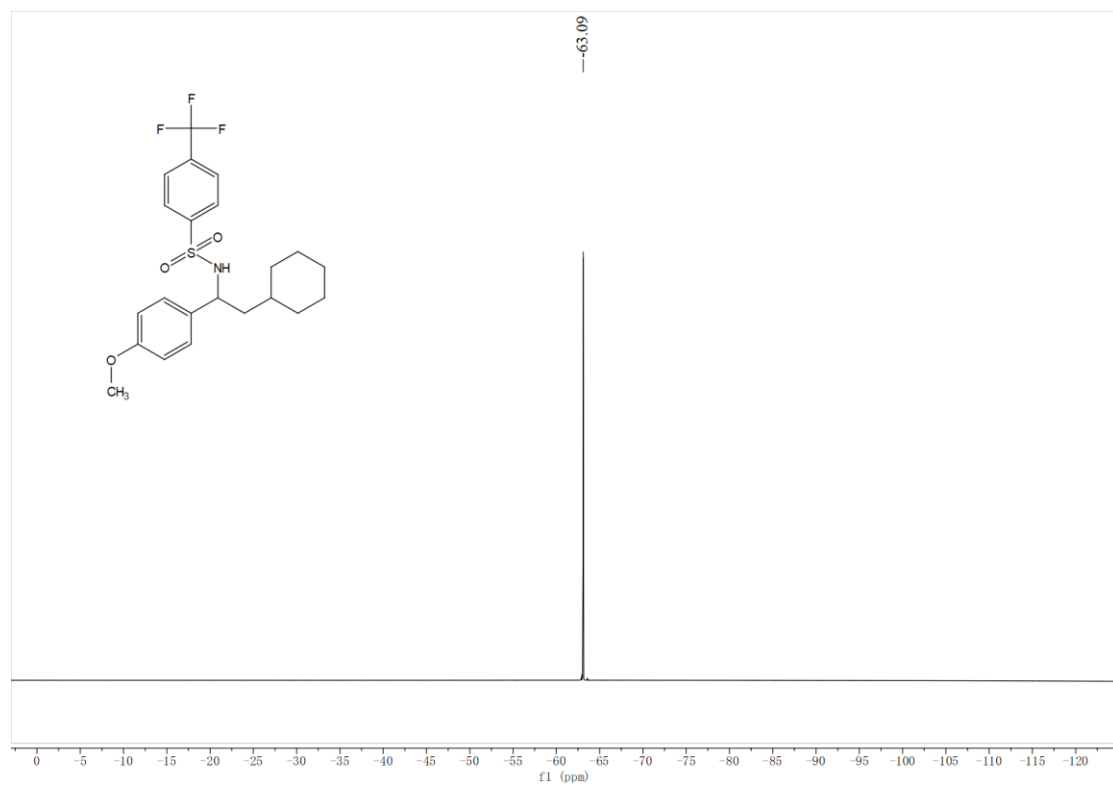

<sup>1</sup>H NMR (400 MHz) Spectrum of **4asa** in CDCl<sub>3</sub>

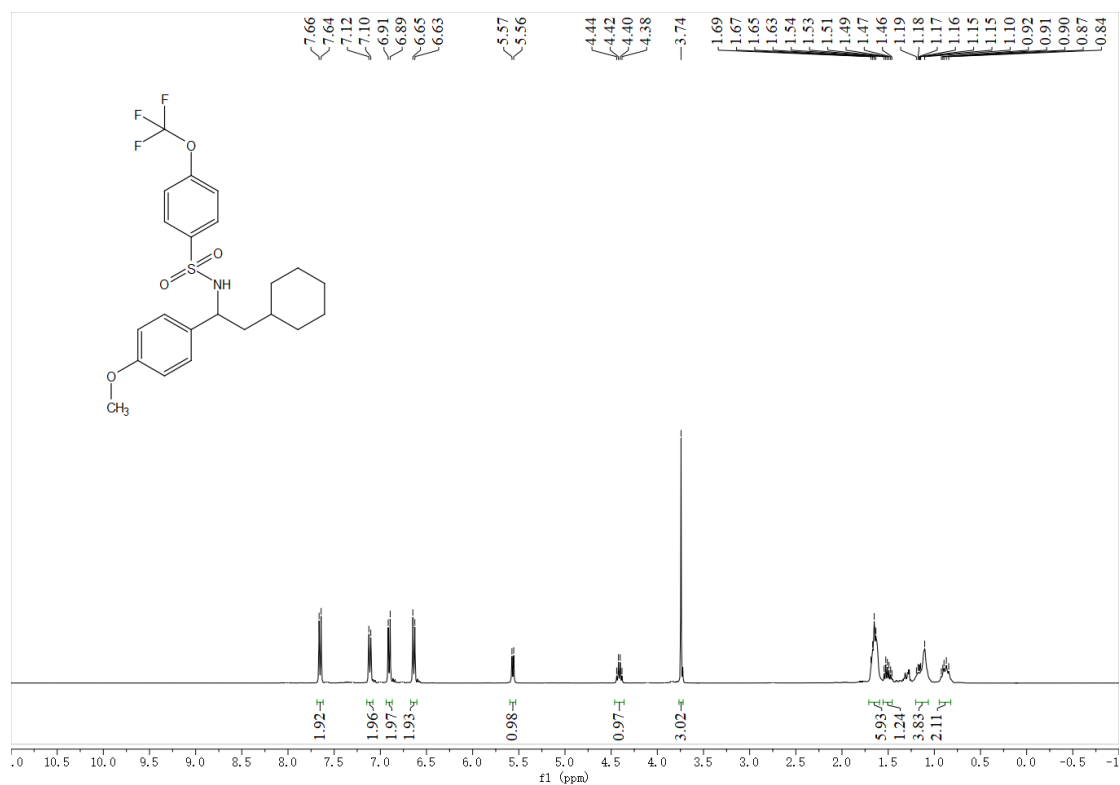

<sup>13</sup>C{<sup>1</sup>H} NMR (101 MHz) Spectrum of **4asa** in CDCl<sub>3</sub>

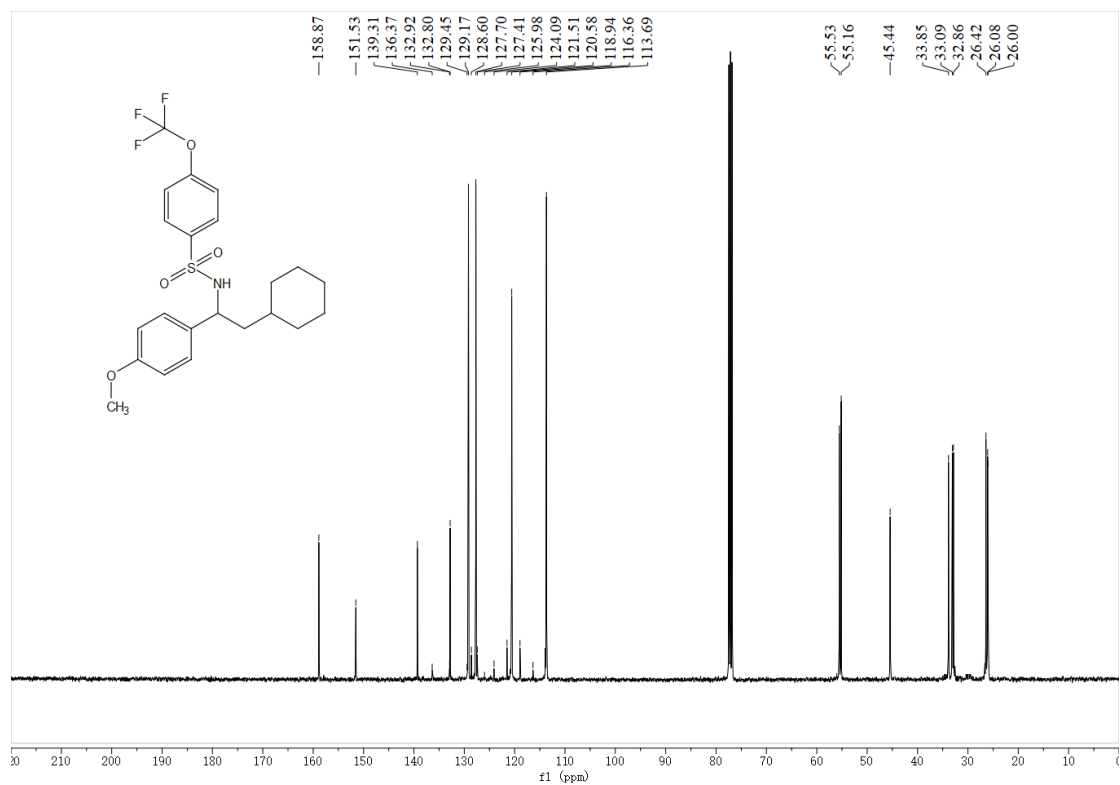

<sup>19</sup>F NMR (376 MHz) Spectrum of **4asa** in CDCl<sub>3</sub>

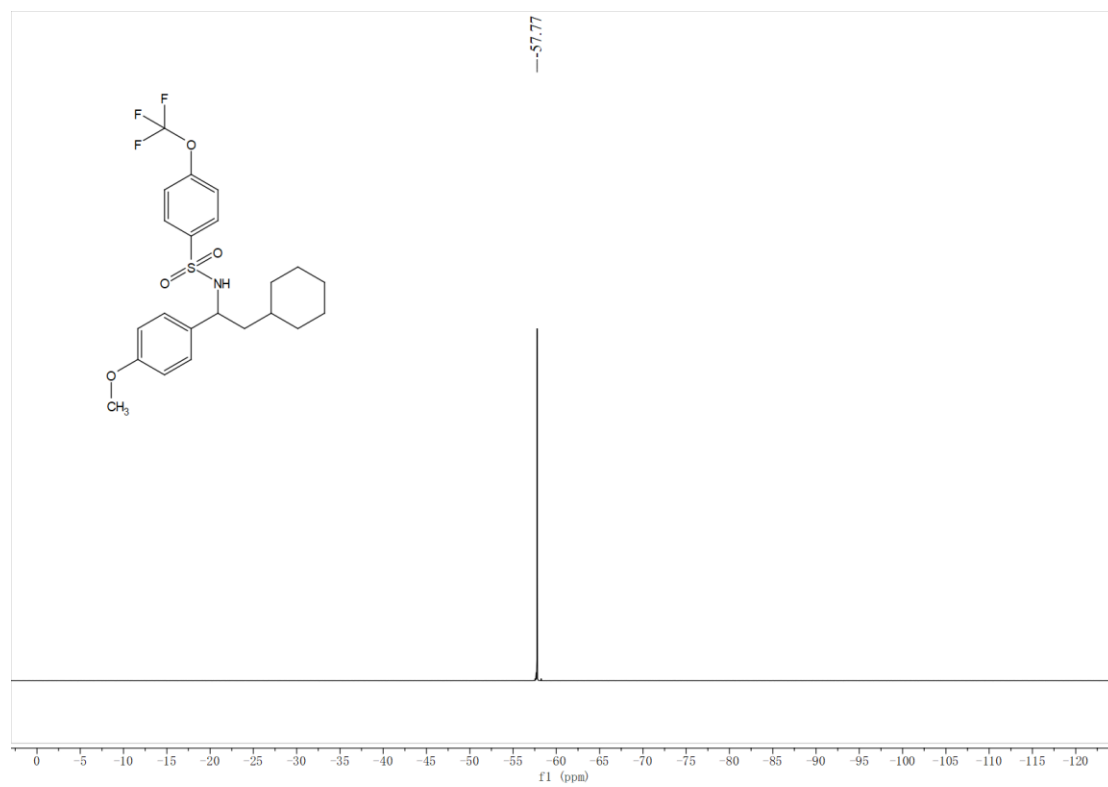

<sup>1</sup>H NMR (400 MHz) Spectrum of **4ata** in CDCl<sub>3</sub>

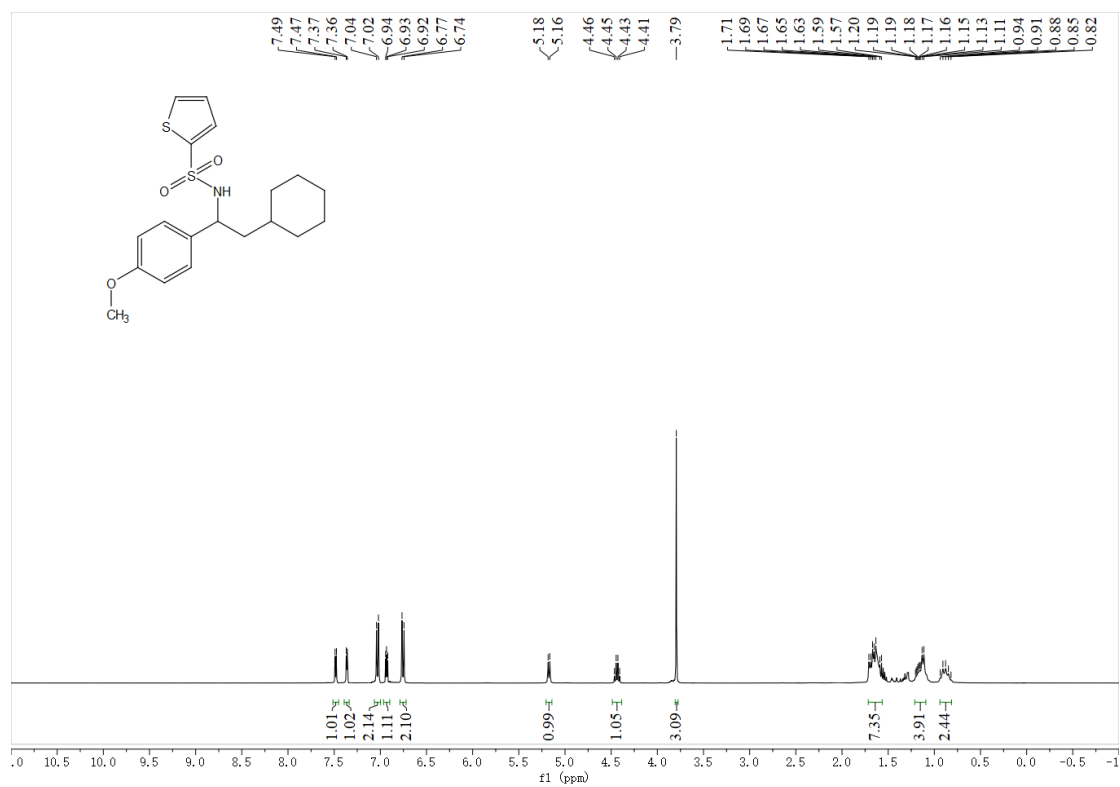

$^{13}\text{C}\{^1\text{H}\}$  NMR (101 MHz) Spectrum of **4ata** in  $\text{CDCl}_3$

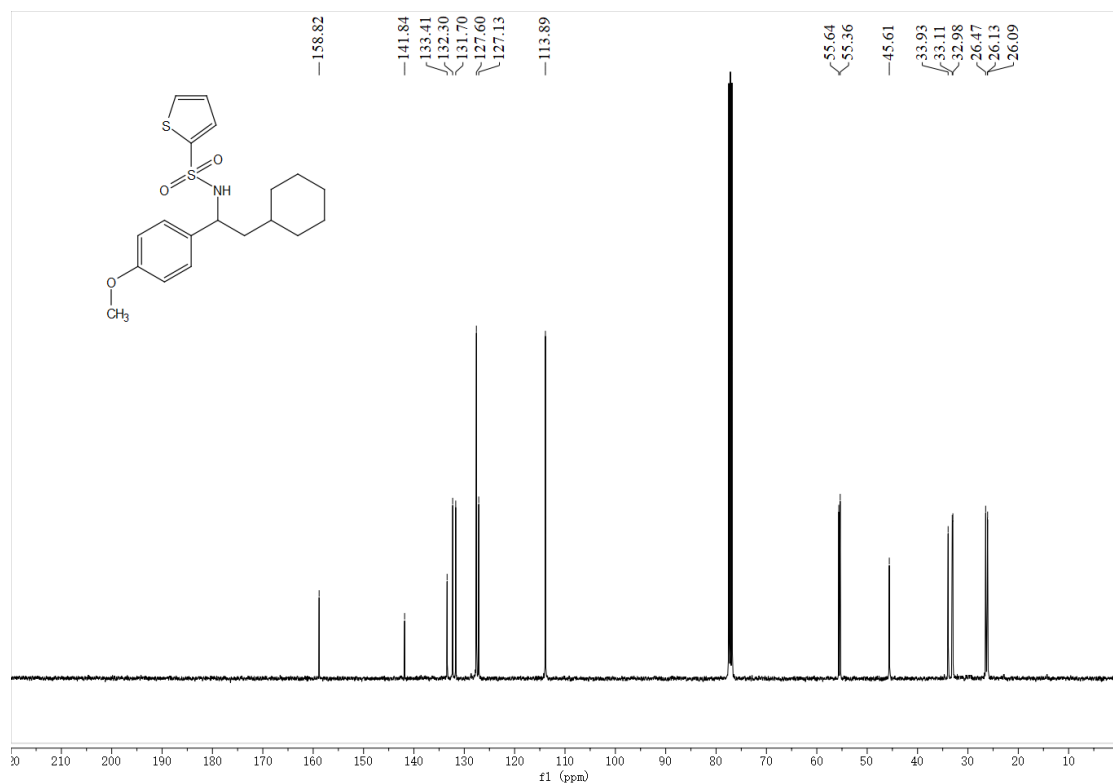

$^1\text{H}$  NMR (400 MHz) Spectrum of **4aua** in  $\text{CDCl}_3$

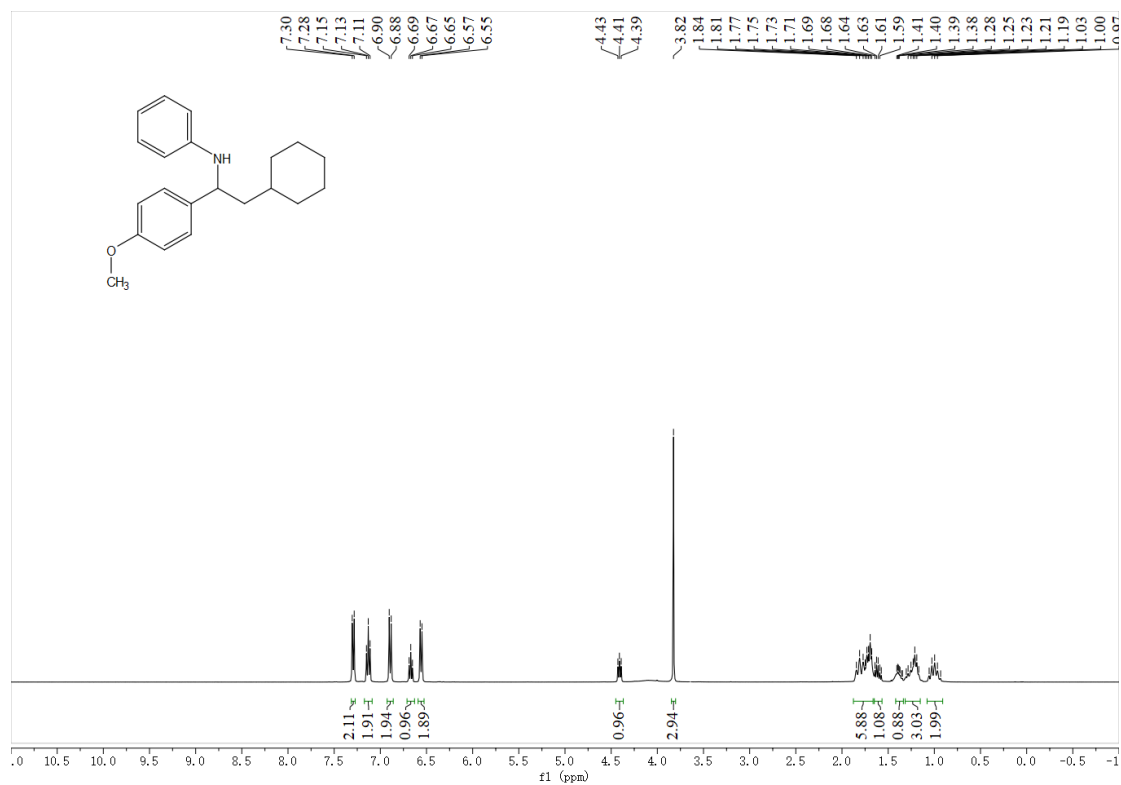



$^{13}\text{C}\{^1\text{H}\}$  NMR (101 MHz) Spectrum of **4aua** in  $\text{CDCl}_3$

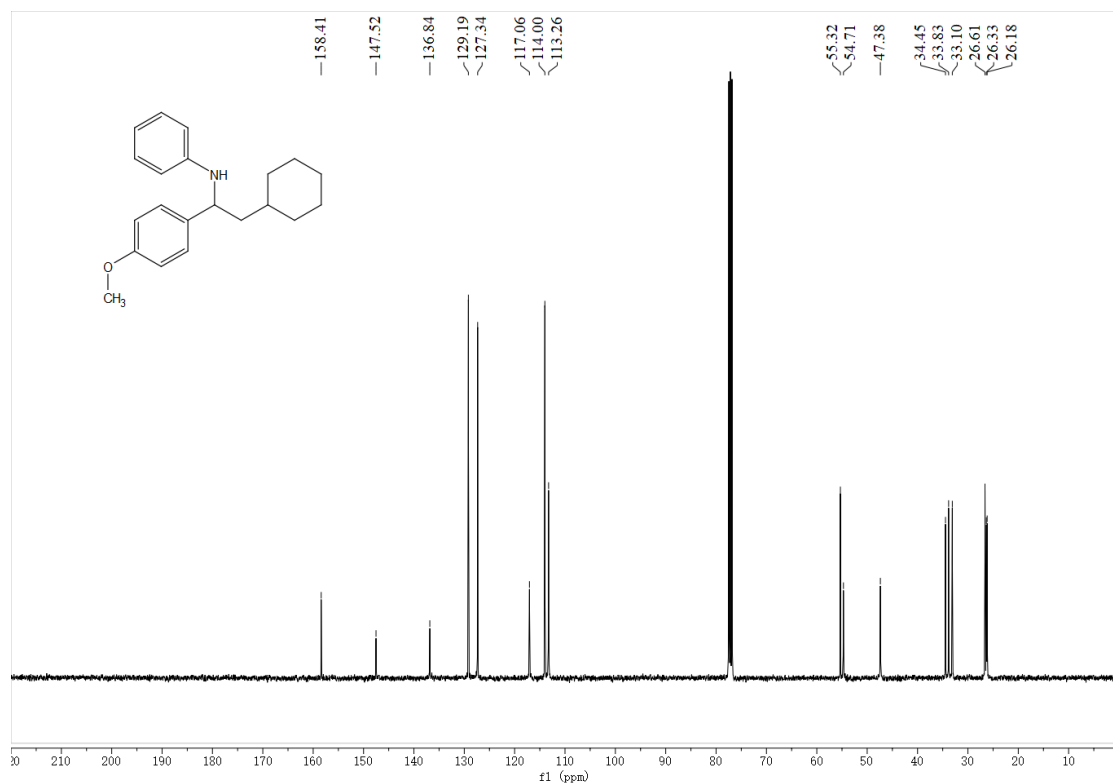

$^1\text{H}$  NMR (400 MHz) Spectrum of **4ava** in  $\text{CDCl}_3$

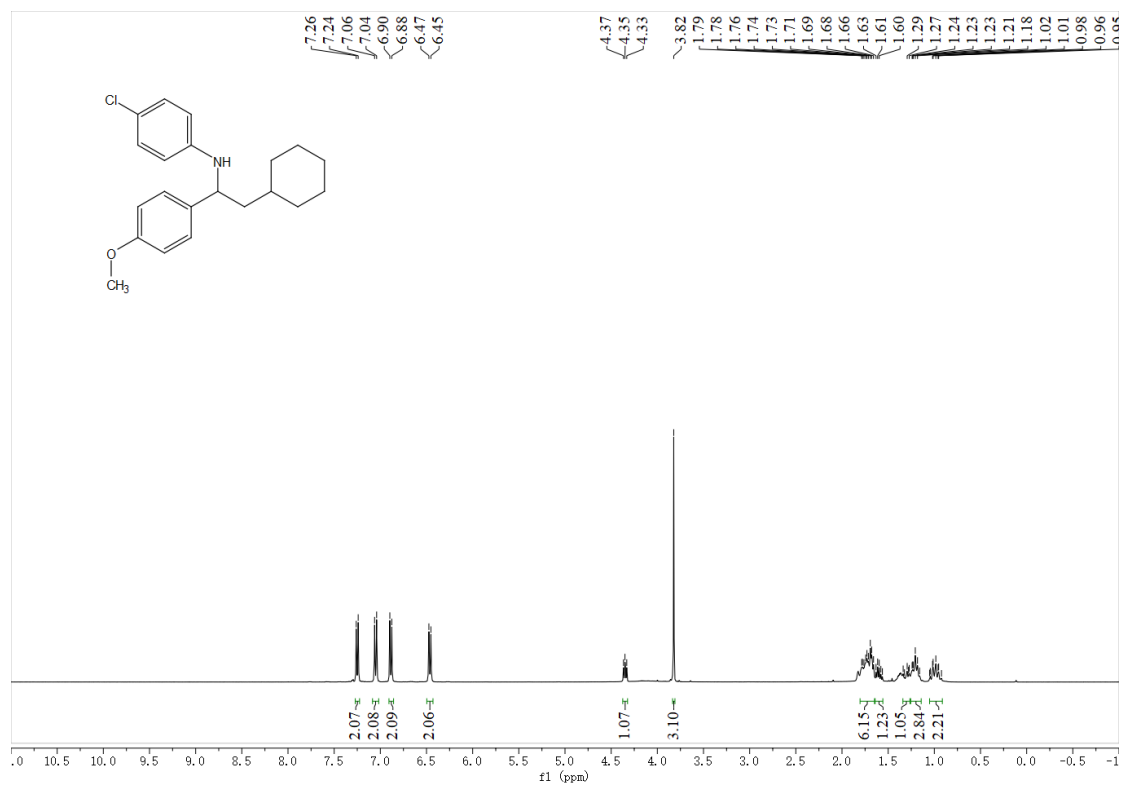

$^{13}\text{C}\{^1\text{H}\}$  NMR (101 MHz) Spectrum of **4ava** in  $\text{CDCl}_3$

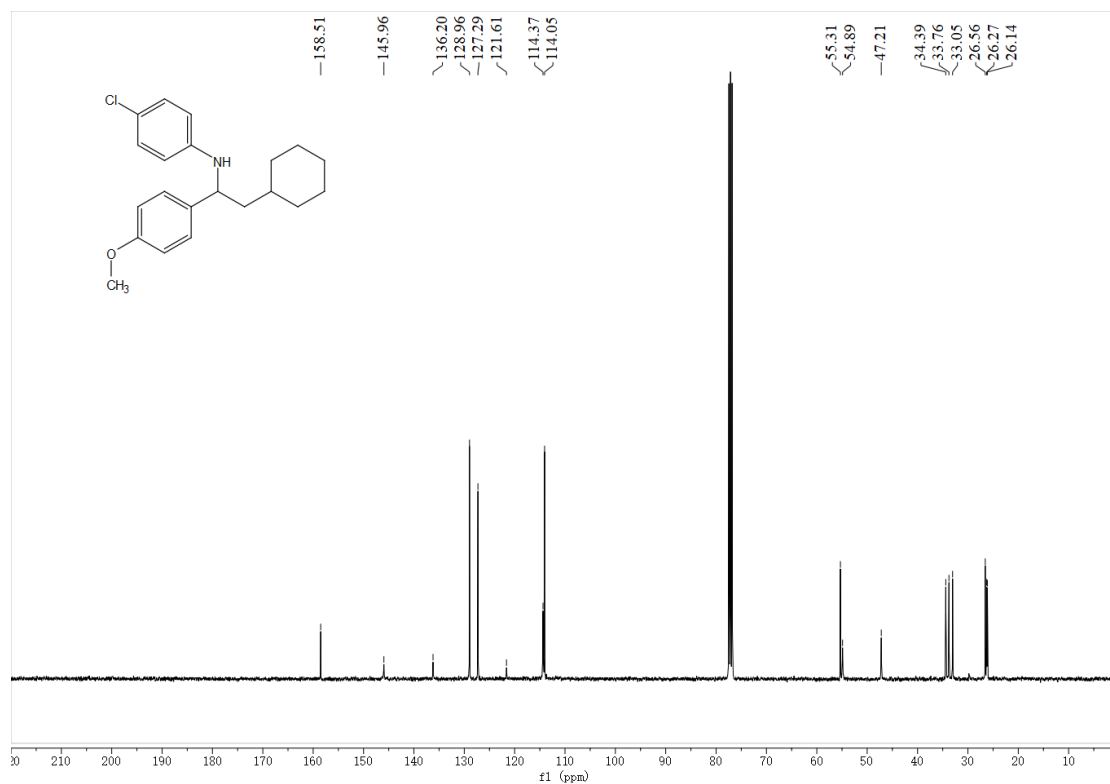

$^1\text{H}$  NMR (400 MHz) Spectrum of **4av'a** in  $\text{CDCl}_3$

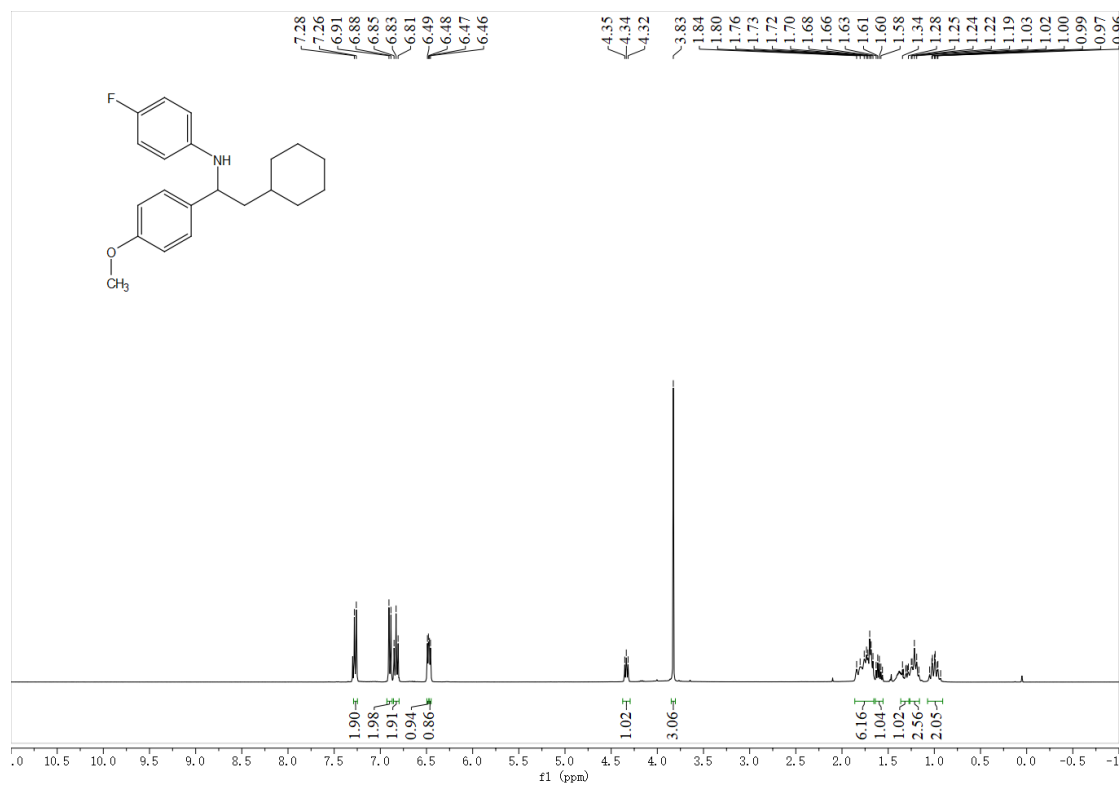

$^{13}\text{C}\{^1\text{H}\}$  NMR (101 MHz) Spectrum of **4av'a** in  $\text{CDCl}_3$

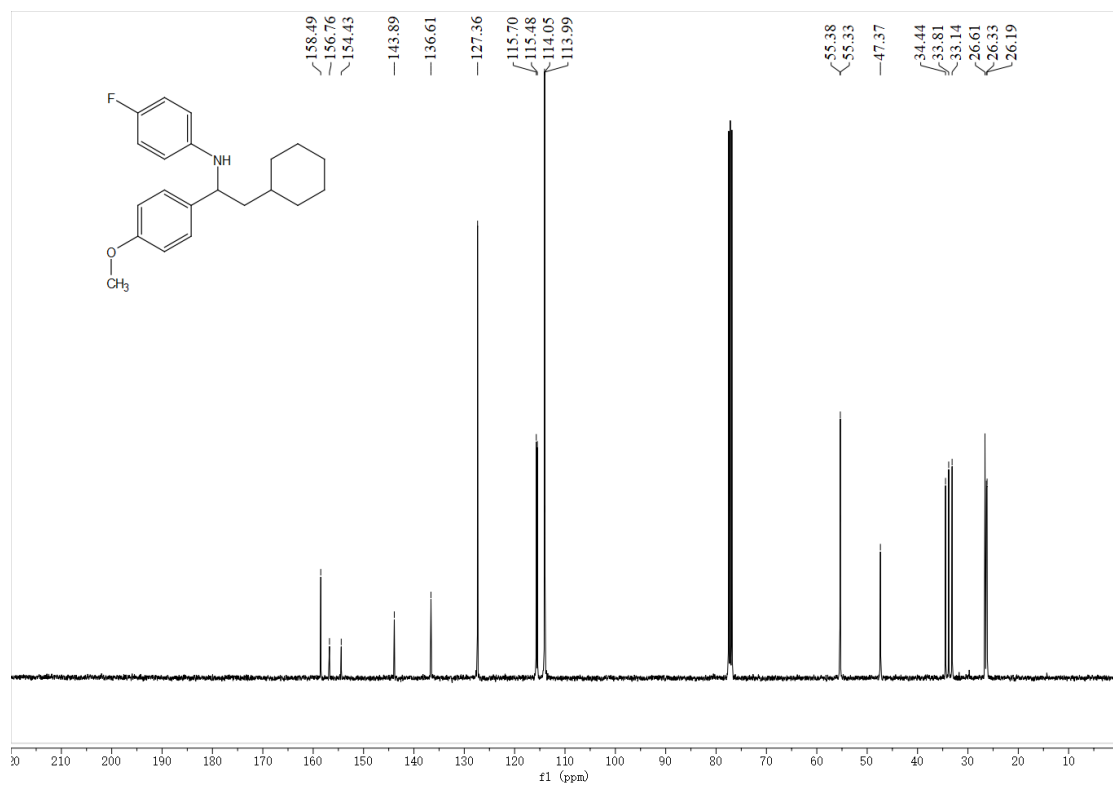

$^{19}\text{F}$  NMR (376 MHz) Spectrum of **4av'a** in  $\text{CDCl}_3$

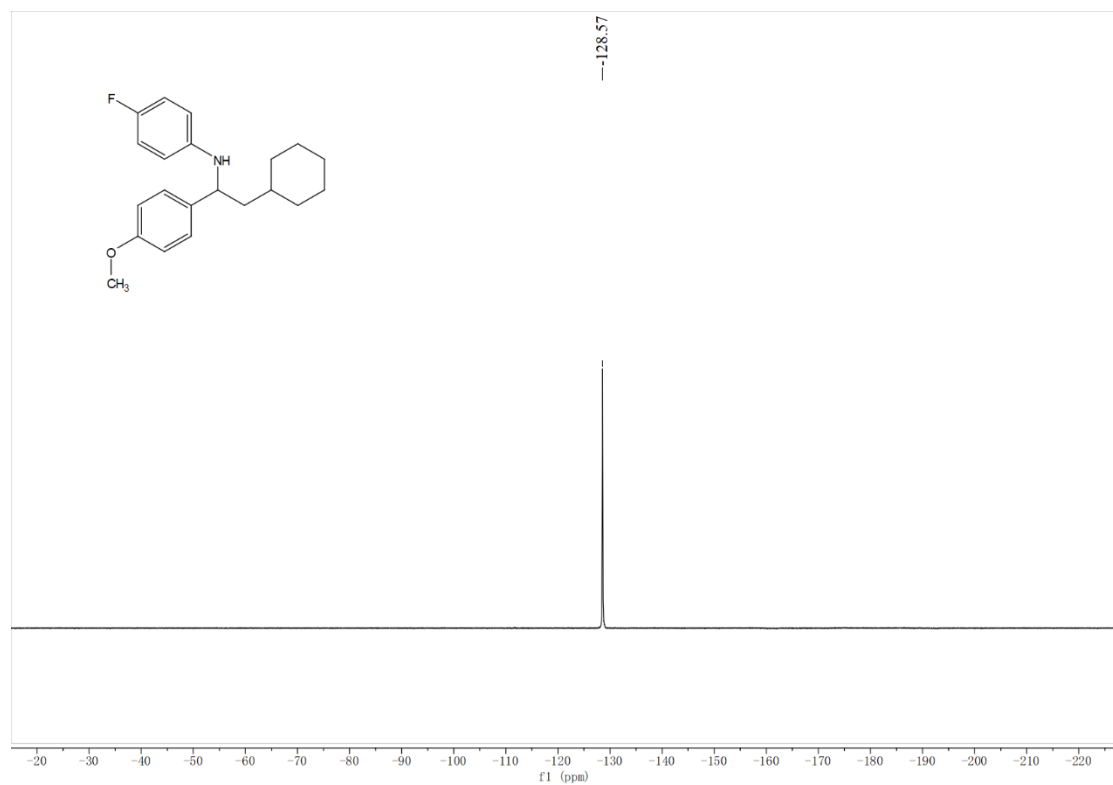

<sup>1</sup>H NMR (400 MHz) Spectrum of **4av''a** in CDCl<sub>3</sub>

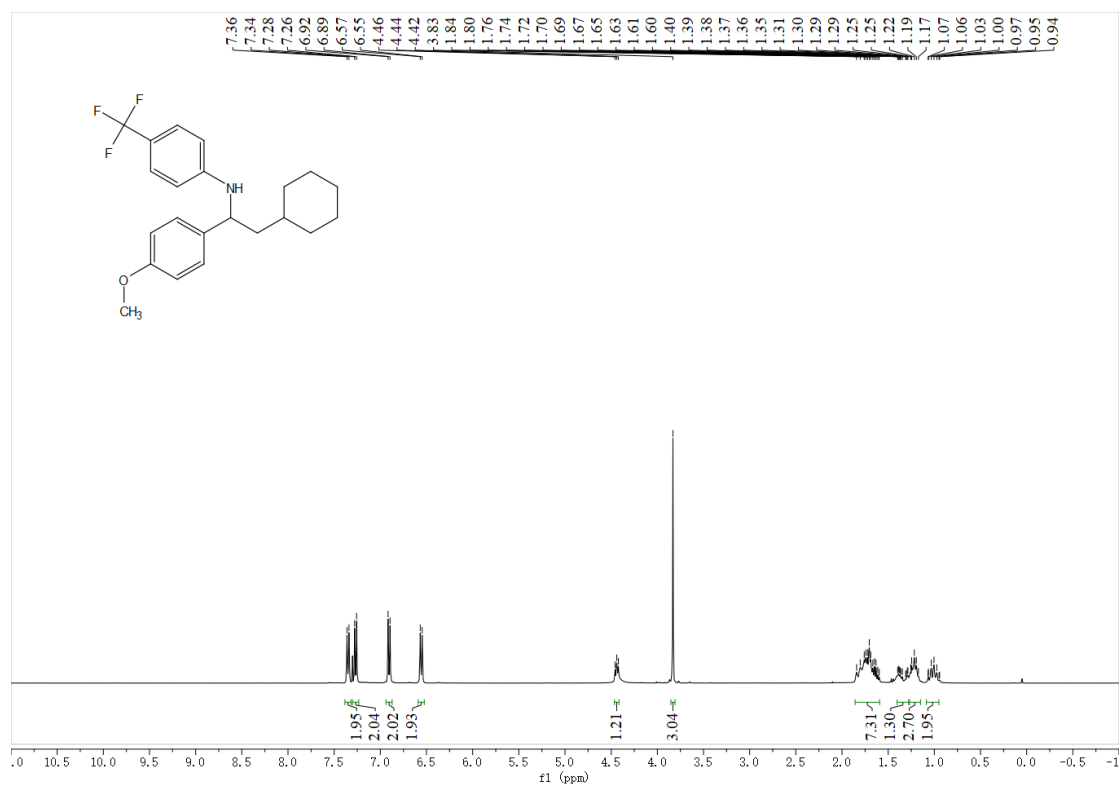

<sup>13</sup>C{<sup>1</sup>H} NMR (101 MHz) Spectrum of **4av''a** in CDCl<sub>3</sub>

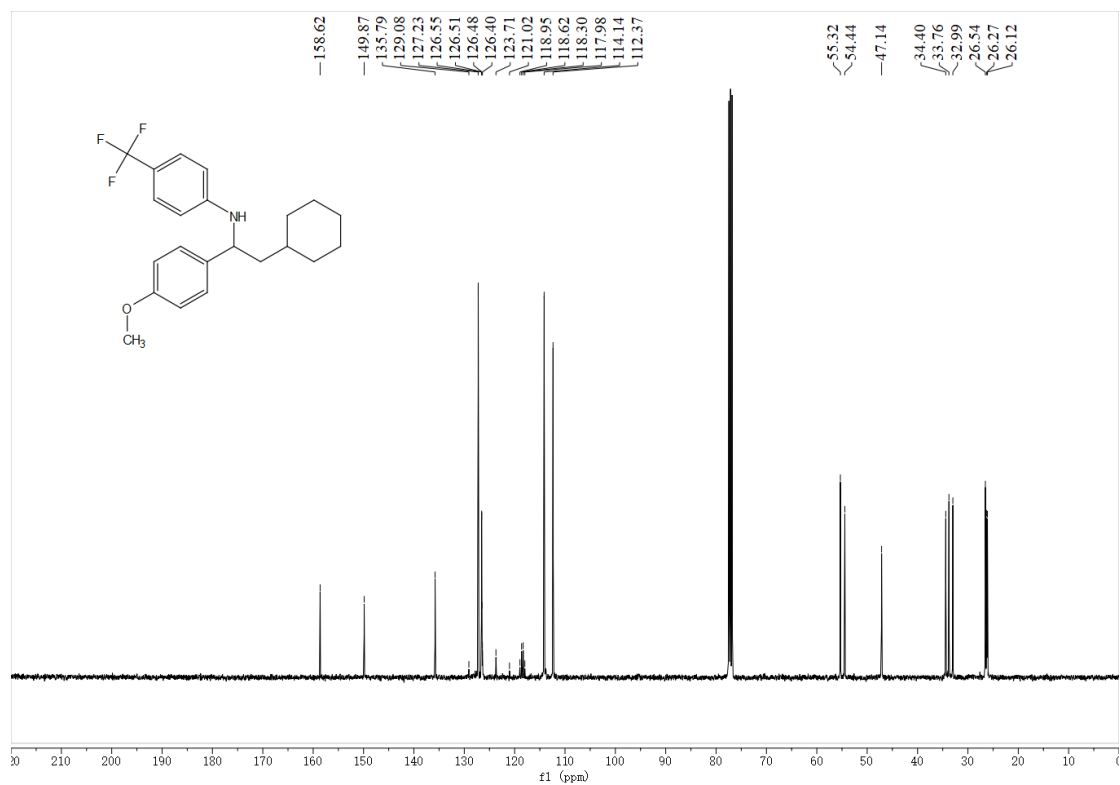

<sup>19</sup>F NMR (376 MHz) Spectrum of **4av''a** in CDCl<sub>3</sub>

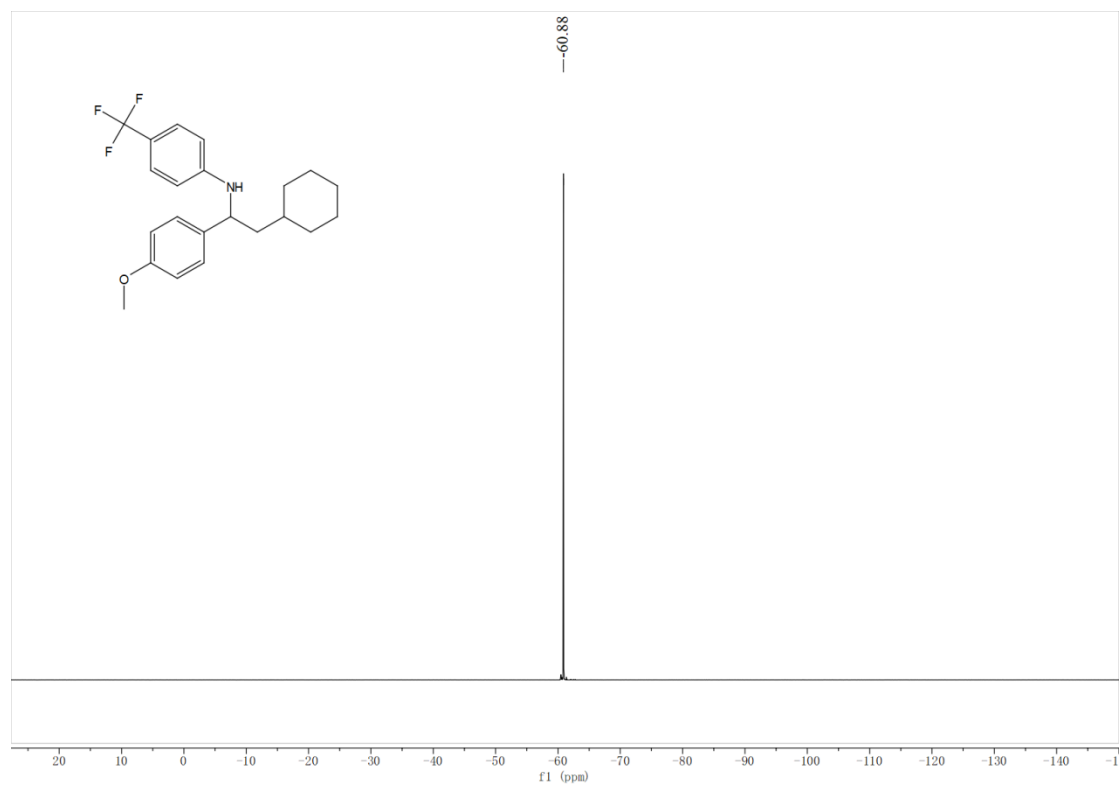

<sup>1</sup>H NMR (400 MHz) Spectrum of **4av'''a** in CDCl<sub>3</sub>

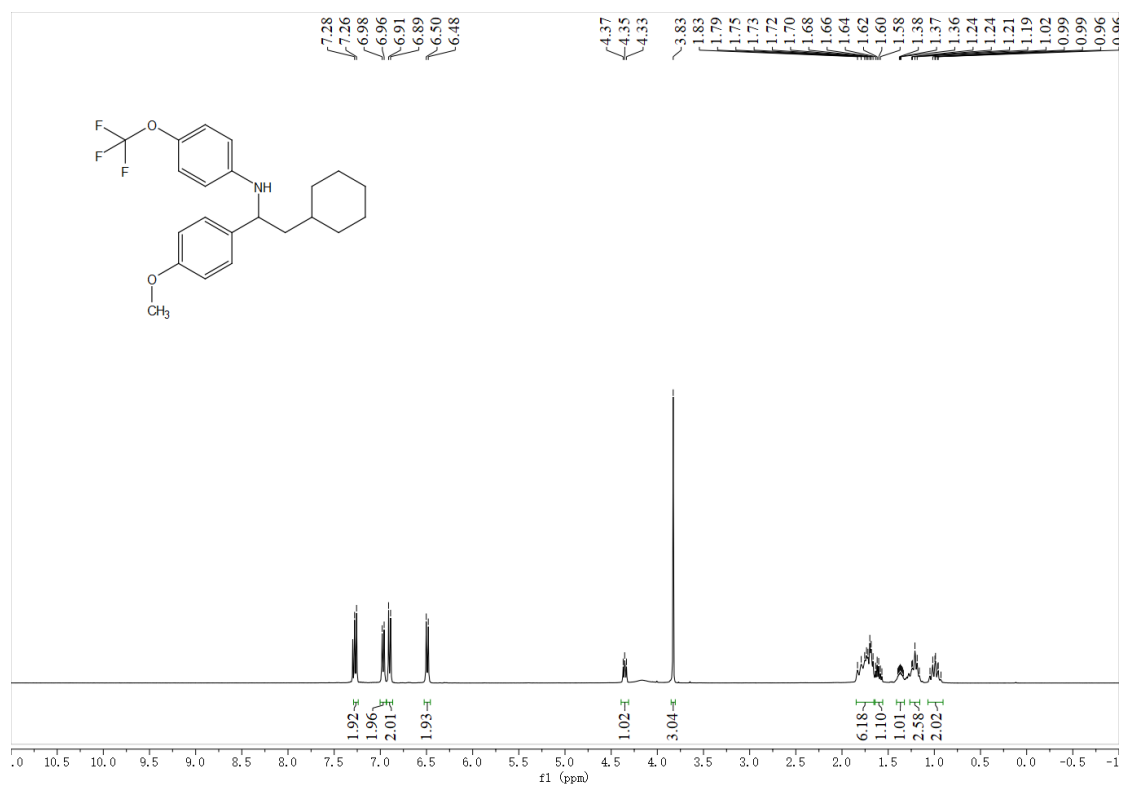

$^{13}\text{C}\{^1\text{H}\}$  NMR (101 MHz) Spectrum of **4av'''a** in  $\text{CDCl}_3$

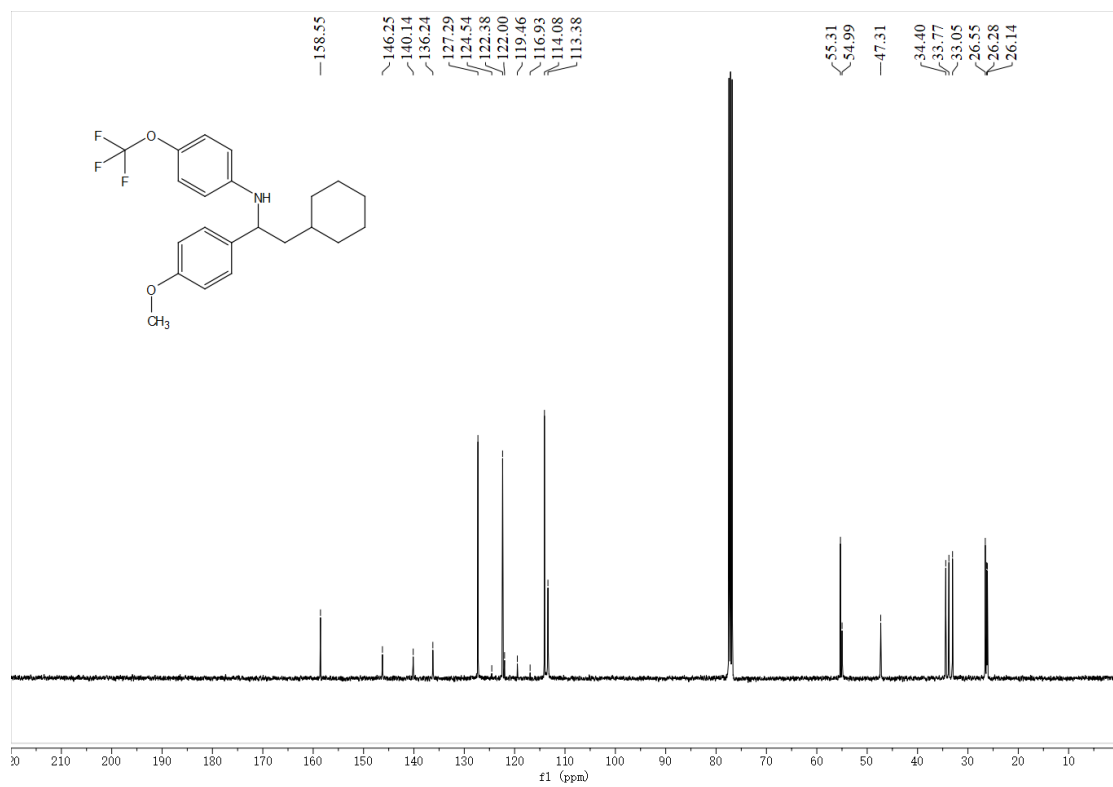

$^{19}\text{F}$  NMR (376 MHz) Spectrum of **4av'''a** in  $\text{CDCl}_3$

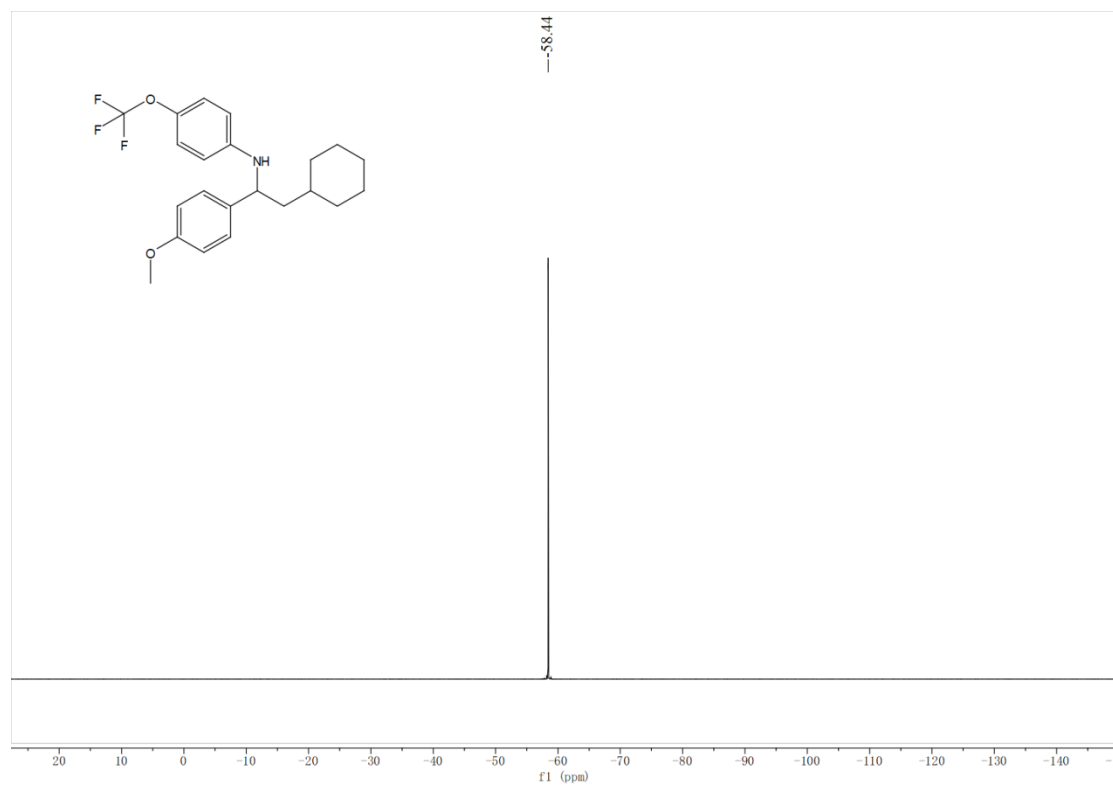

$^1\text{H}$  NMR (400 MHz) Spectrum of **4awa** in  $\text{CDCl}_3$

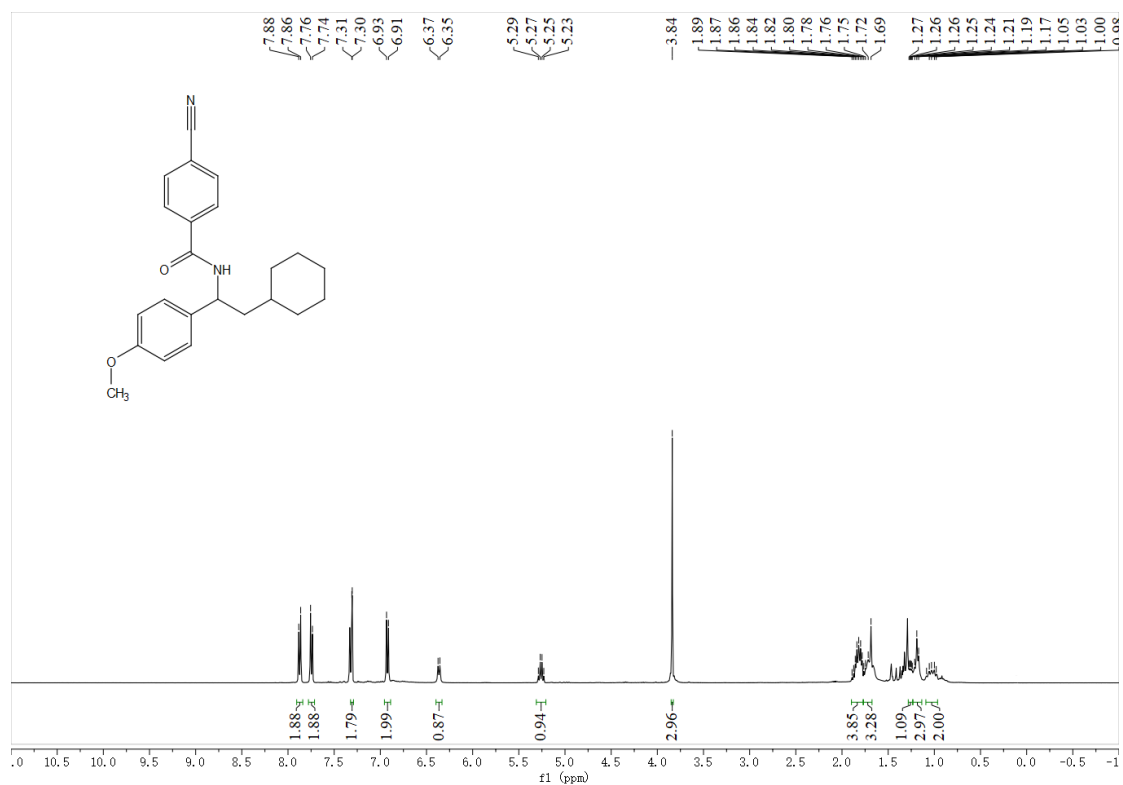

$^{13}\text{C}\{^1\text{H}\}$  NMR (101 MHz) Spectrum of **4awa** in  $\text{CDCl}_3$

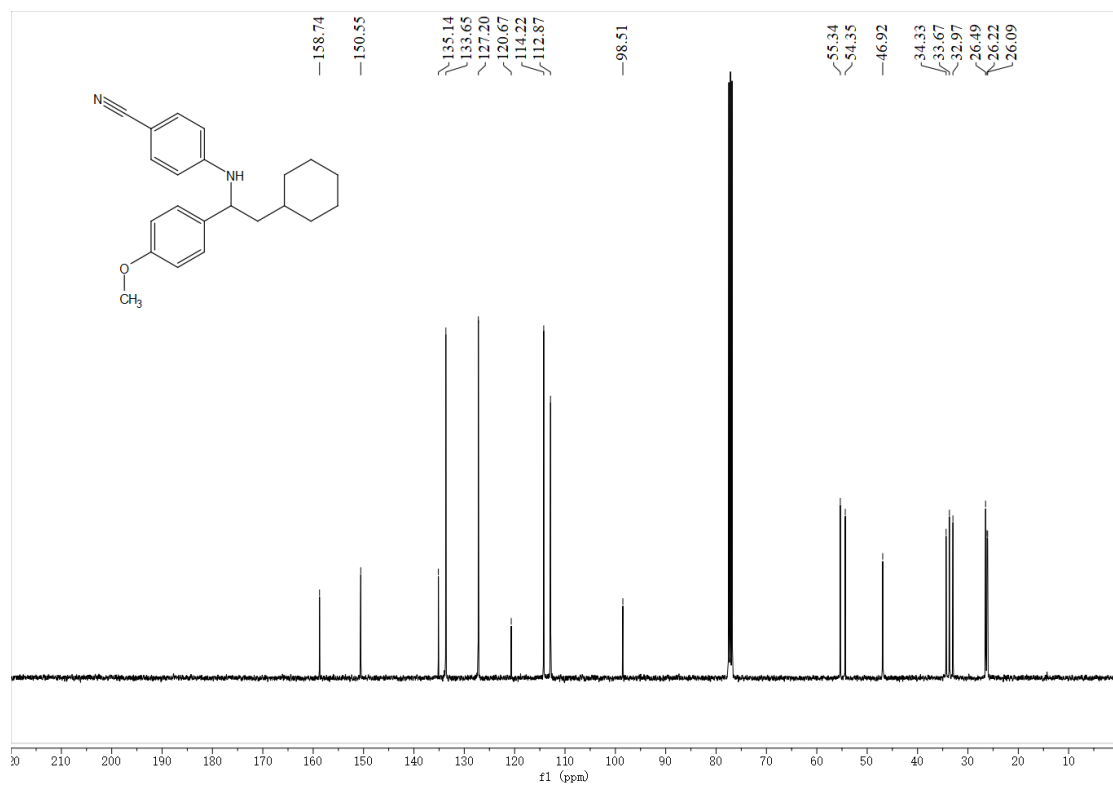

<sup>1</sup>H NMR (400 MHz) Spectrum of **4axa** in CDCl<sub>3</sub>

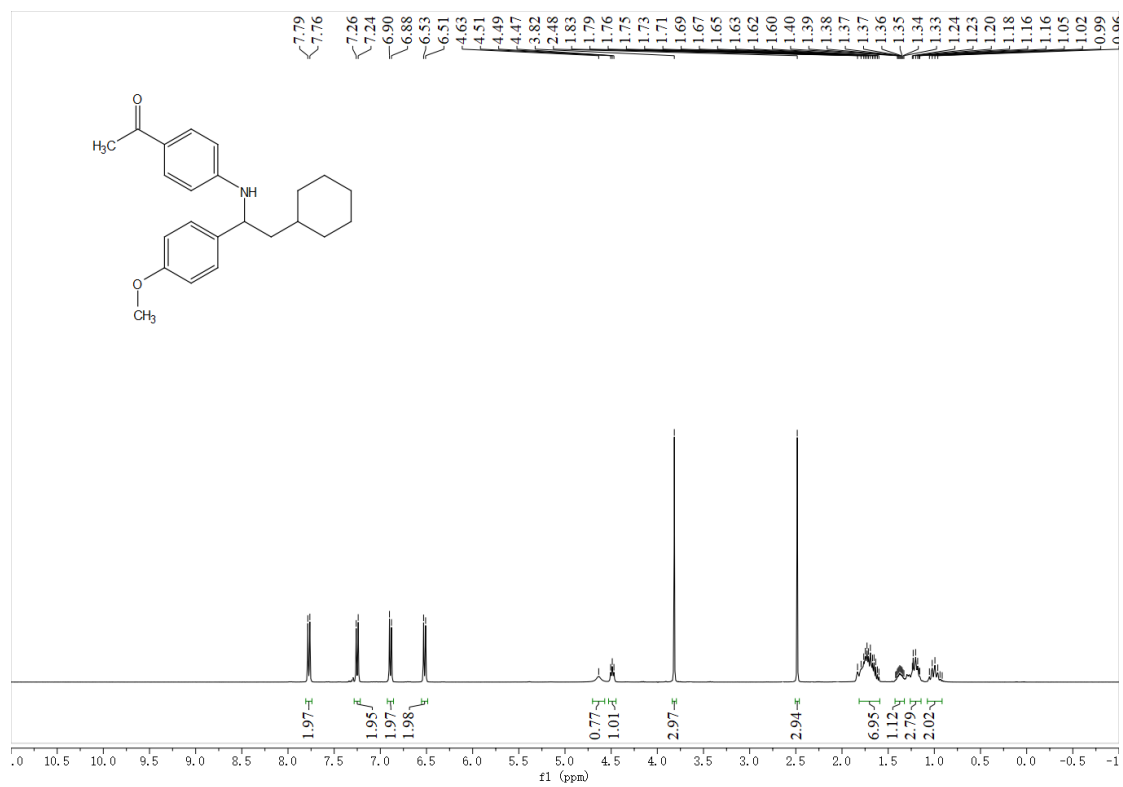

<sup>13</sup>C{<sup>1</sup>H} NMR (101 MHz) Spectrum of **4axa** in CDCl<sub>3</sub>

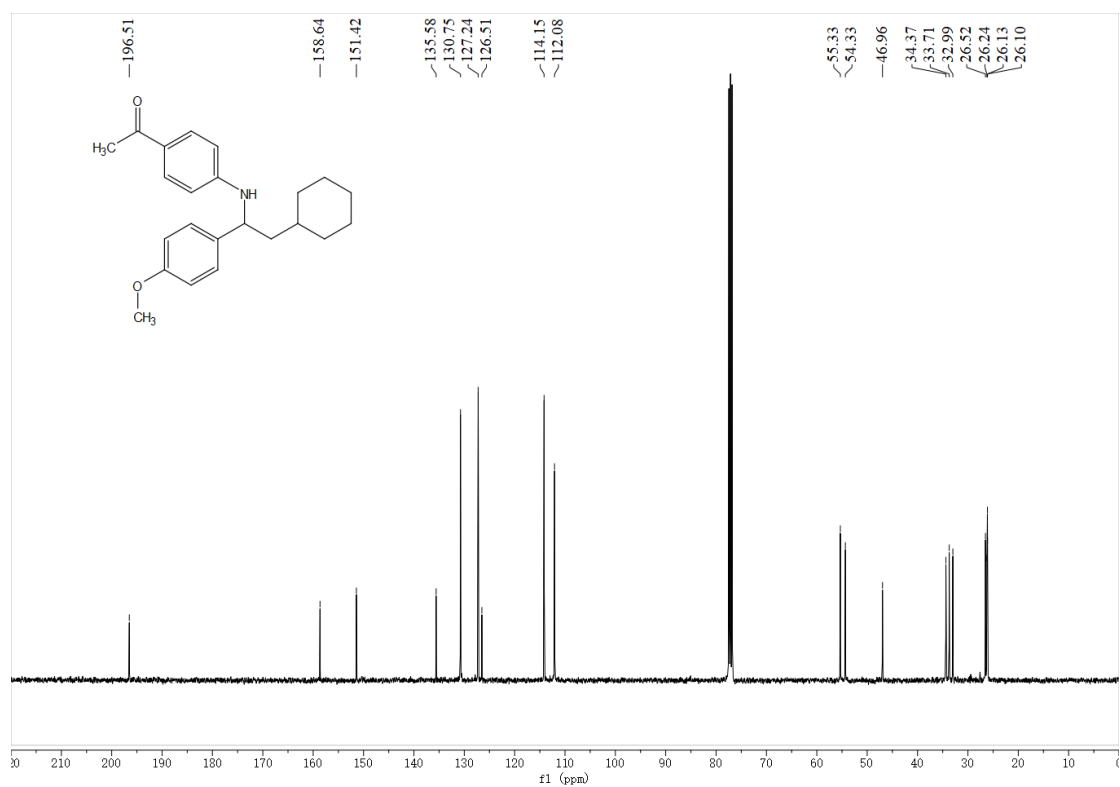



$^1\text{H}$  NMR (400 MHz) Spectrum of **4aab** in  $\text{CDCl}_3$

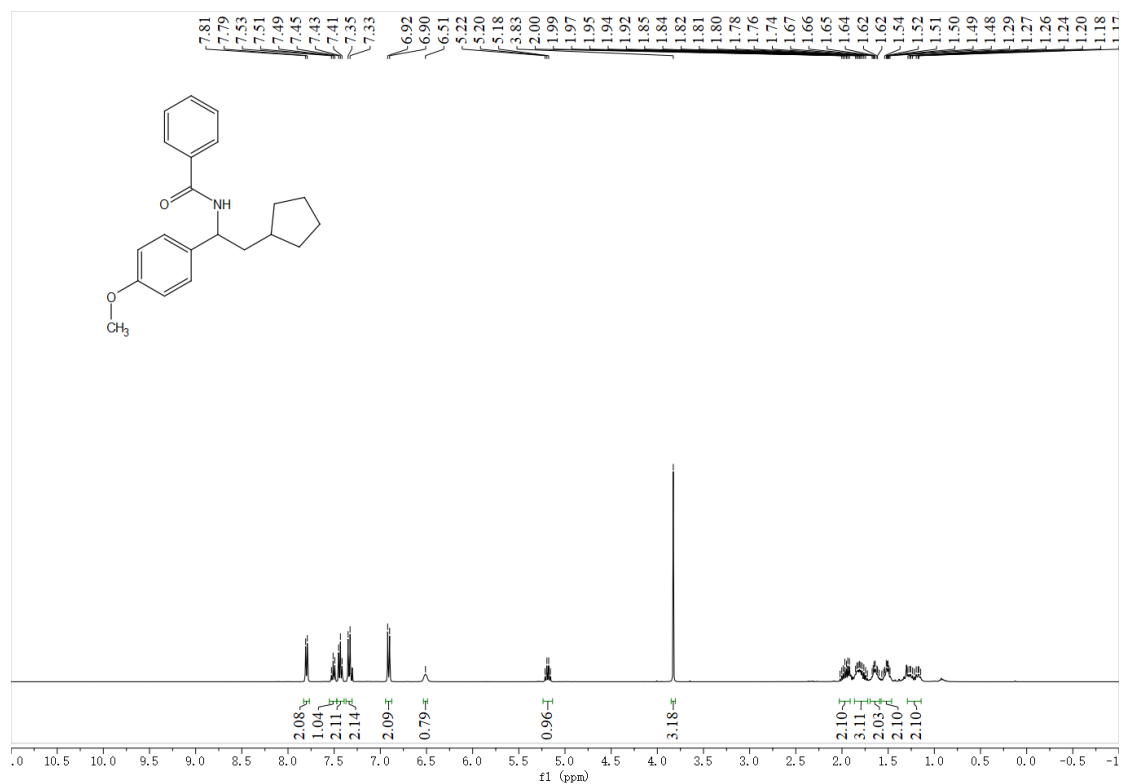

$^{13}\text{C}\{^1\text{H}\}$  NMR (101 MHz) Spectrum of **4aab** in  $\text{CDCl}_3$

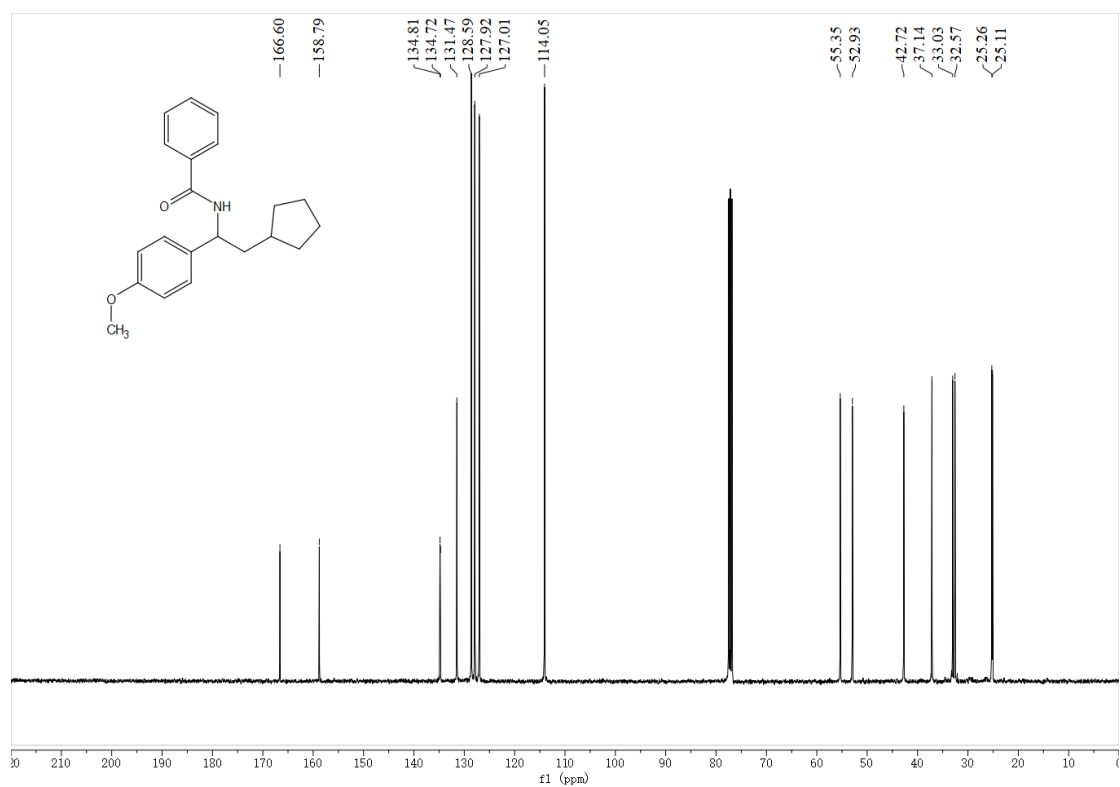

$^1\text{H}$  NMR (400 MHz) Spectrum of **4aac** in  $\text{CDCl}_3$

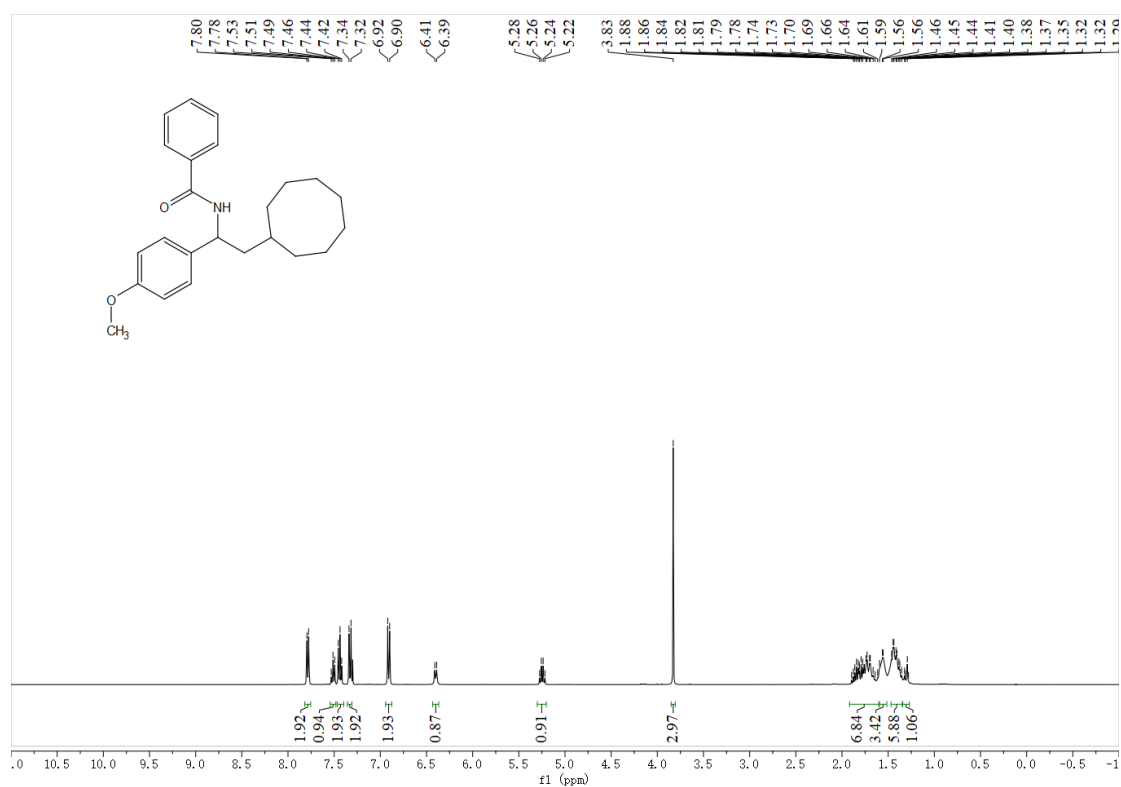

$^{13}\text{C}\{^1\text{H}\}$  NMR (101 MHz) Spectrum of **4aac** in  $\text{CDCl}_3$

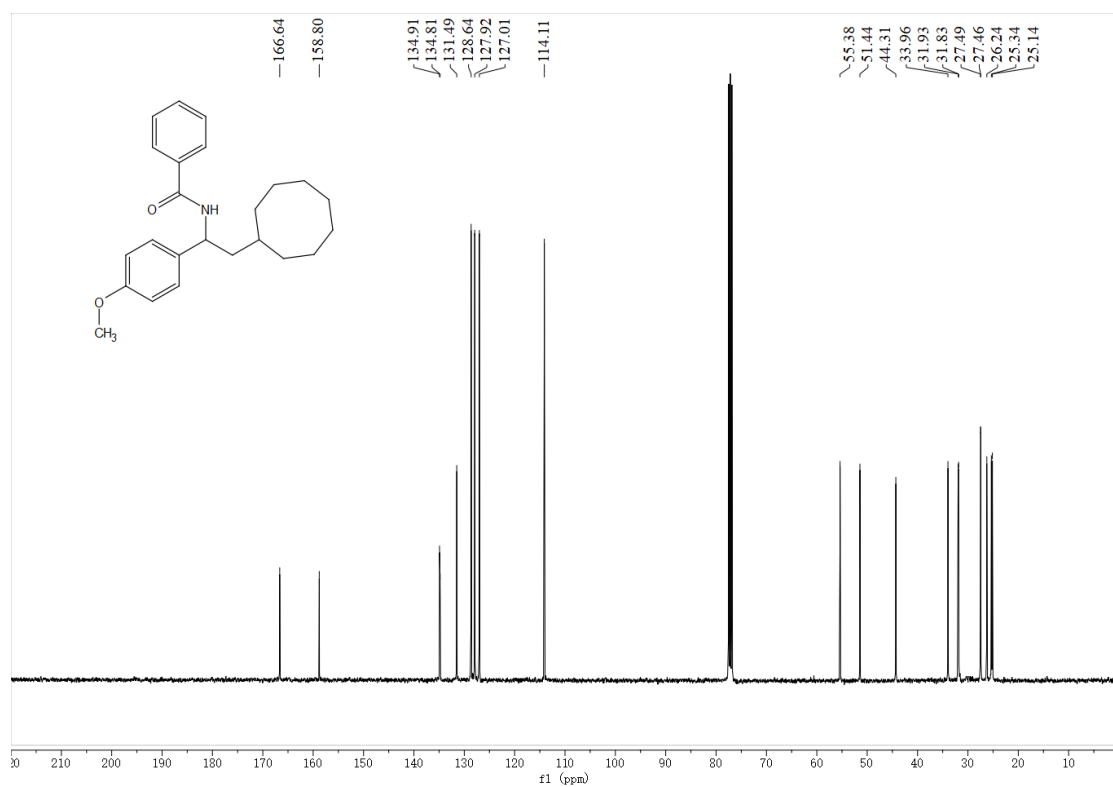

$^1\text{H}$  NMR (600 MHz) Spectrum of **4aad** in  $\text{CDCl}_3$

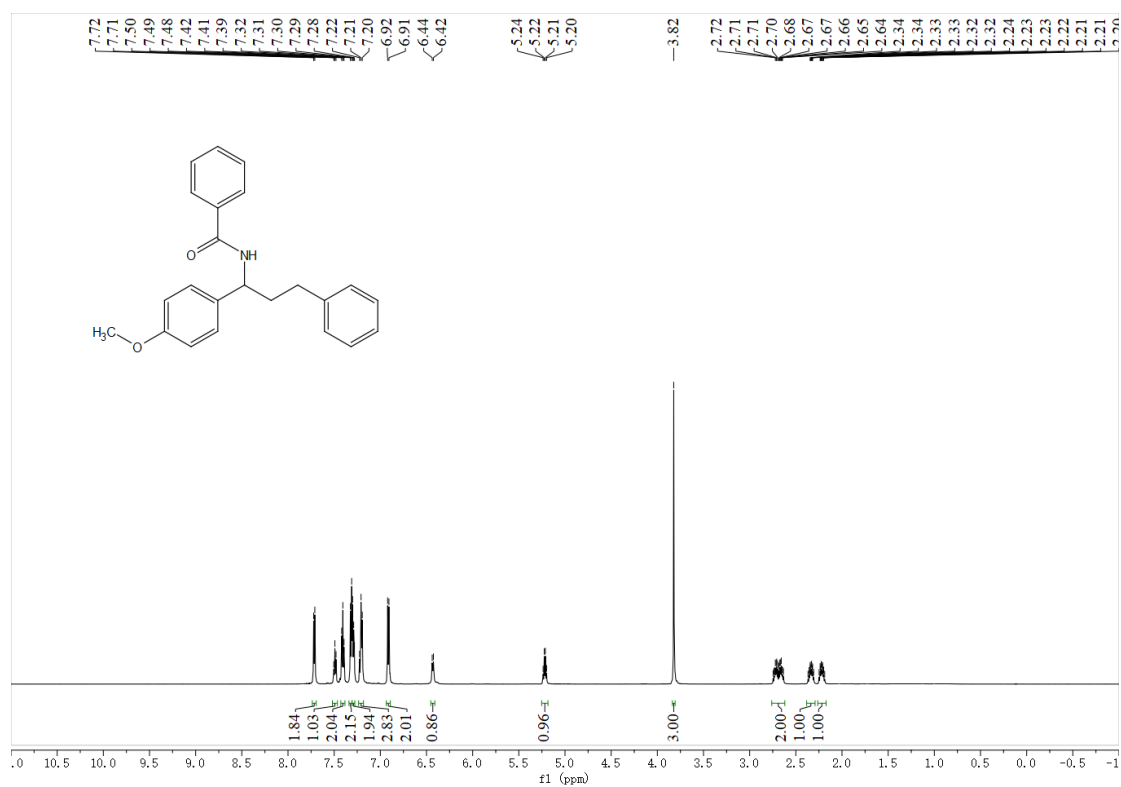

$^{13}\text{C}\{^1\text{H}\}$  NMR (151 MHz) Spectrum of **4aad** in  $\text{CDCl}_3$

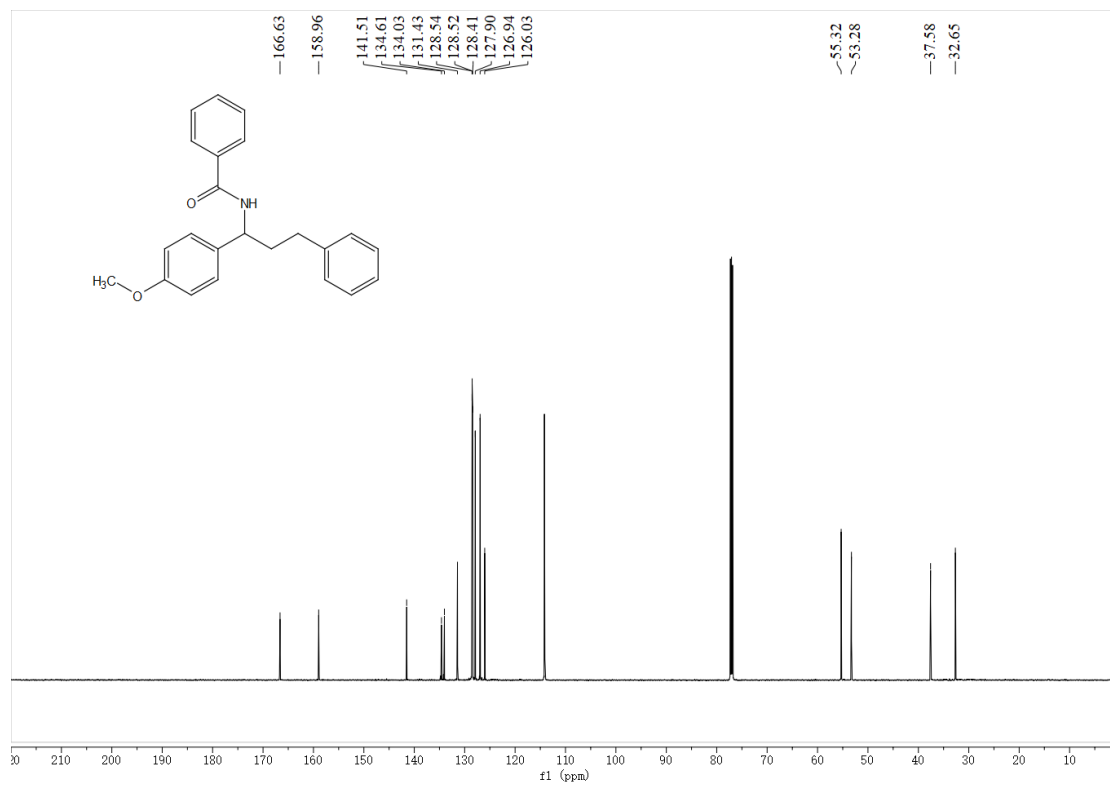

Supplement: d3qo01934a1.pdf [file d3qo01934a1.pdf]
